# Supplementary material
Source: PubMed Central journal article supplement (PMC7686561)
Supplement: zsaa086_suppl_supplementary_tables.pdf [file zsaa086_suppl_supplementary_tables.pdf]

## **Proteomic biomarkers of sleep apnea**

*Aditya Ambati<sup>1</sup>, Yo-El Ju<sup>2</sup>, Ling Lin<sup>1</sup>, Alexander N. Olesen<sup>1</sup>, Henriette Koch<sup>1</sup>, Julien Jacques Hedou<sup>1</sup>, Eileen B. Leary<sup>1</sup>, Vicente Peris Sempere<sup>1</sup>, Emmanuel Mignot<sup>1</sup>, Shahrad Taheri<sup>3</sup>*

1. Stanford University Center for Sleep Sciences and Medicine, 3165 Porter Drive, Palo Alto, CA94304, USA.
2. Department of Neurology, Washington University School of Medicine, 660 S Euclid Avenue, Box 8111, St. Louis MO 63110, USA.
3. Department of Medicine and Clinical Research Core, Weill Cornell Medicine – Qatar, Qatar Foundation – Education City, PO Box 24144, Doha, Qatar.

Correspondence:

Prof. Emmanuel Mignot MD PhD

Stanford University Center for Sleep Sciences and Medicine,  
3165 Porter Drive, Palo Alto, CA94304, [mignot@stanford.edu](mailto:mignot@stanford.edu)

or

Prof. Shahrad Taheri MD PhD

Department of Medicine and Clinical Research Core,  
Weill Cornell Medicine – Qatar, Qatar Foundation – Education City,  
PO Box 24144, Doha, Qatar, [staheri@me.com](mailto:staheri@me.com)

Table S1

| <b>Table S1: Full list of protein variables used in the SOMAscan panel</b> |               |                                                               |               |                |                     |                         |                 |
|----------------------------------------------------------------------------|---------------|---------------------------------------------------------------|---------------|----------------|---------------------|-------------------------|-----------------|
| <u>SegId</u>                                                               | <u>Somald</u> | <u>TargetFullName</u>                                         | <u>Target</u> | <u>UniProt</u> | <u>EntrezGeneID</u> | <u>EntrezGeneSymbol</u> | <u>Dilution</u> |
| 10336-3_3                                                                  | SL019100      | E3 ubiquitin-protein ligase CHIP                              | CHIP          | Q9UNE7         | 10273               | STUB1                   | 40              |
| 10337-83_3                                                                 | SL007136      | CCAAT/enhancer-binding protein beta                           | CEBPB         | P17676         | 1051                | CEBPB                   | 40              |
| 10339-48_3                                                                 | SL001731      | Gamma-enolase                                                 | NSE           | P09104         | 2026                | ENO2                    | 1               |
| 10342-55_3                                                                 | SL019096      | E3 SUMO-protein ligase PIAS4                                  | PIAS4         | Q8N2W9         | 51588               | PIAS4                   | 40              |
| 10344-334_3                                                                | SL005173      | Interleukin-10 receptor subunit alpha                         | IL-10 Ra      | Q13651         | 3587                | IL10RA                  | 1               |
| 10346-5_3                                                                  | SL007221      | Signal transducer and activator of transcription 3            | STAT3         | P40763         | 6774                | STAT3                   | 1               |
| 10351-51_3                                                                 | SL007108      | Interferon regulatory factor 1                                | IRF1          | P10914         | 3659                | IRF1                    | 1               |
| 10356-21_3                                                                 | SL000455      | Transcription factor AP-1                                     | c-Jun         | P05412         | 3725                | JUN                     | 40              |
| 10358-33_3                                                                 | SL003755      | Induced myeloid leukemia cell differentiation protein Mcl-1   | Mcl-1         | Q07820         | 4170                | MCL1                    | 40              |
| 10361-25_3                                                                 | SL014684      | 2'-5'-oligoadenylate synthase 1                               | OAS1          | P00973         | 4938                | OAS1                    | 40              |
| 10362-35_3                                                                 | SL002565      | Myc proto-oncogene protein                                    | c-Myc         | P01106         | 4609                | MYC                     | 40              |
| 10363-13_3                                                                 | SL004097      | Mothers against decapentaplegic homolog 3                     | SMAD3         | P84022         | 4088                | SMAD3                   | 1               |
| 10364-6_3                                                                  | SL004101      | Mothers against decapentaplegic homolog 2                     | SMAD2         | Q15796         | 4087                | SMAD2                   | 40              |
| 10365-132_3                                                                | SL005184      | Interleukin-23                                                | IL-23         | P29460, Q9NPF7 | 3593 51561          | IL12B IL23A             | 40              |
| 10366-11_3                                                                 | SL001728      | Platelet-derived growth factor receptor alpha                 | PDGFRA        | P16234         | 5156                | PDGFRA                  | 40              |
| 10367-62_3                                                                 | SL001716      | Interleukin-12                                                | IL-12         | P29459, P29460 | 3592 3593           | IL12A IL12B             | 40              |
| 10370-21_3                                                                 | SL004396      | Signal transducer and activator of transcription 1 alpha/beta | STAT1         | P42224         | 6772                | STAT1                   | 40              |
| 10372-18_3                                                                 | SL007229      | Signal transducer and activator of transcription 6            | STAT6         | P42226         | 6778                | STAT6                   | 1               |
| 10990-21_3                                                                 | SL017128      | Leucine-rich repeat serine/threonine-protein kinase 2         | LRRK2         | Q5S007         |                     | LRRK2                   | 1               |
| 11067-13_3                                                                 | SL001791      | Osteocalcin                                                   | Osteocalcin   | P02818         | 632                 | BGLAP                   | 1               |
| 11071-1_3                                                                  | SL000481      | Interleukin-5                                                 | IL-5          | P05113         | 3567                | IL5                     | 40              |
| 11081-1_3                                                                  | SL007151      | Glycerol-3-phosphate dehydrogenase [NAD(+)], cytoplasmic      | GPDA          | P21695         | 2819                | GPD1                    | 40              |
| 11089-7_3                                                                  | SL000459      | Immunoglobulin A                                              | IgA           | P01876 P01877  | 3493 3494           | IGHA1 IGH A2            | 0.005           |
| 11094-104_3                                                                | SL007361      | Galectin-10                                                   | LPPL          | Q05315         | 1178                | CLC                     | 40              |
| 11096-57_3                                                                 | SL018921      | HemK methyltransferase family member 2                        | HEMK2         | Q9Y5N5         | 29104               | N6AMT1                  | 1               |
| 11098-1_3                                                                  | SL007953      | Pyridoxal kinase                                              | PDXK          | O00764         | 8566                | PDXK                    | 40              |
| 11101-18_3                                                                 | SL004489      | Toll-like receptor 4                                          | TLR4          | O00206         | 7099                | TLR4                    | 40              |

Table S1

| <b>SeqId</b> | <b>Somald</b> | <b>TargetFullName</b>                             | <b>Target</b>                | <b>UniProt</b> | <b>EntrezGeneID</b> | <b>EntrezGeneSymbo</b> | <b>Dilution</b> |
|--------------|---------------|---------------------------------------------------|------------------------------|----------------|---------------------|------------------------|-----------------|
| 11102-22_3   | SL012561      | Regenerating islet-derived protein 4              | REG4                         | Q9BYZ8         | 83998               | REG4                   | 1               |
| 11103-24_3   | SL000448      | Heat shock protein beta-1                         | HSP 27                       | P04792         | 3315                | HSPB1                  | 40              |
| 11104-13_3   | SL003340      | Chitinase-3-like protein 1                        | YKL-40                       | P36222         | 1116                | CHI3L1                 | 1               |
| 11105-171_3  | SL003650      | Alpha-enolase                                     | Alpha enolase                | P06733         | 2023                | ENO1                   | 1               |
| 11510-31_3   | SL005699      | Apolipoprotein L1                                 | Apo L1                       | O14791         | 8542                | APOL1                  | 0.005           |
| 11513-92_3   | SL002722      | ADP-ribosyl cyclase/cyclic ADP-ribose hydrolase 1 | CD38                         | P28907         | 952                 | CD38                   | 40              |
| 11514-196_3  | SL004557      | CD59 glycoprotein                                 | CD59                         | P13987         | 966                 | CD59                   | 1               |
| 11516-7_3    | SL006131      | Fatty acid-binding protein, liver                 | FABPL                        | P07148         | 2168                | FABP1                  | 40              |
| 12060-28_3   | SL004345      | Growth/differentiation factor 11                  | GDF-11                       | O95390         | 10220               | GDF11                  | 40              |
| 13088-397_3  | SL000137      | Betacellulin                                      | BTC                          | P35070         | 685                 | BTC                    | 40              |
| 13089-6_3    | SL003349      | Hypoxia-inducible factor 1-alpha                  | HIF-1a                       | Q16665         | 3091                | HIF1A                  | 1               |
| 13090-17_3   | SL004827      | Protein S100-A6                                   | S100A6                       | P06703         | 6277                | S100A6                 | 1               |
| 13093-6_3    | SL005430      | Secreted and transmembrane protein 1              | SECTM1                       | Q8WVN6         | 6398                | SECTM1                 | 1               |
| 13094-75_3   | SL018509      | R-spondin-3                                       | RSPO3                        | Q9BXY4         | 84870               | RSPO3                  | 40              |
| 13095-51_3   | SL005357      | Lithostathine-1-alpha                             | PSP                          | P05451         | 5967                | REG1A                  | 0.005           |
| 13097-11_3   | SL003774      | Bcl-2-like protein 2                              | Apoptosis regulator<br>Bcl-W | Q92843         | 599                 | BCL2L2                 | 40              |
| 13098-93_3   | SL003320      | Vascular endothelial growth factor D              | VEGF-D                       | O43915         | 2277                | FIGF                   | 1               |
| 13101-60_3   | SL007631      | Sclerostin                                        | SOST                         | Q9BQB4         | 50964               | SOST                   | 40              |
| 13102-1_3    | SL012769      | Protein FAM3D                                     | FAM3D                        | Q96BQ1         | 131177              | FAM3D                  | 1               |
| 13103-125_3  | SL009328      | Chorionic somatomammotropin hormone               | CSH                          | P0DML2 P0DML3  | 1442 1443           | CSH1 CSH2              | 1               |
| 13104-32_3   | SL008614      | Ephrin-B1                                         | EFNB1                        | P98172         | 1947                | EFNB1                  | 1               |
| 13105-7_3    | SL007311      | Synaptosomal-associated protein 25                | SNP25                        | P60880         | 6616                | SNAP25                 | 1               |
| 13107-9_3    | SL008402      | Ly6/PLAUR domain-containing protein 3             | LYPD3                        | O95274         | 27076               | LYPD3                  | 1               |
| 13109-82_3   | SL008810      | Neuronal growth regulator 1                       | NEGR1                        | Q7Z3B1         | 257194              | NEGR1                  | 1               |
| 13111-79_3   | SL007223      | B-cell lymphoma 6 protein                         | BCL6                         | P41182         | 604                 | BCL6                   | 1               |
| 13112-179_3  | SL009349      | Follistatin-related protein 1                     | FSTL1                        | Q12841         | 11167               | FSTL1                  | 1               |
| 13113-7_3    | SL002688      | Osteopontin                                       | Osteopontin                  | P10451         | 6696                | SPP1                   | 1               |
| 13114-50_3   | SL006230      | Lumican                                           | Lumican                      | P51884         | 4060                | LUM                    | 0.005           |
| 13116-25_3   | SL008931      | CD177 antigen                                     | CD177                        | Q8N6Q3         | 57126               | CD177                  | 1               |

Table S1

| SeqId       | Somald   | TargetFullName                                                      | Target              | UniProt | EntrezGeneID | EntrezGeneSymbo | Dilution |
|-------------|----------|---------------------------------------------------------------------|---------------------|---------|--------------|-----------------|----------|
| 13117-232_3 | SL018256 | Choline/ethanolamine kinase                                         | CHKB                | Q9Y259  | 1120         | CHKB            | 1        |
| 13118-5_3   | SL011888 | SPARC-related modular calcium-binding protein                       | SMOC1               | Q9H4F8  | 64093        | SMOC1           | 1        |
| 13119-26_3  | SL004467 | Protein Z-dependent protease inhibitor                              | protein Z inhibitor | Q9UK55  | 51156        | SERPINA10       | 1        |
| 13122-19_3  | SL008360 | Leucine-rich repeat transmembrane protein FLRT2                     | FLRT2               | O43155  | 23768        | FLRT2           | 40       |
| 13123-3_3   | SL008372 | Leucine-rich repeat transmembrane protein FLRT3                     | FLRT3               | Q9NZU0  | 23767        | FLRT3           | 40       |
| 13124-20_3  | SL018587 | Immunoglobulin superfamily containing leucine-rich repeat protein 2 | ISLR2               | Q6UXK2  | 57611        | ISLR2           | 1        |
| 13125-45_3  | SL000616 | Vitronectin                                                         | Vitronectin         | P04004  | 7448         | VTN             | 1        |
| 13126-52_3  | SL008631 | Desmocollin-2                                                       | DSC2                | Q02487  | 1824         | DSC2            | 1        |
| 13129-40_3  | SL007070 | Low-density lipoprotein receptor                                    | LDLR                | P01130  | 3949         | LDLR            | 40       |
| 13130-150_3 | SL007272 | Hexokinase-2                                                        | HXK2                | P52789  | 3099         | HK2             | 40       |
| 13131-5_3   | SL011180 | Hexokinase-1                                                        | HXK1                | P19367  | 3098         | HK1             | 1        |
| 13132-14_3  | SL008522 | Semaphorin-5A                                                       | SEM5A               | Q13591  | 9037         | SEMA5A          | 1        |
| 13133-73_3  | SL007033 | Latent-transforming growth factor beta-binding protein 4            | LTBP4               | Q8N2S1  | 8425         | LTBP4           | 1        |
| 14114-18_3  | SL019019 | PILR alpha-associated neural protein                                | PIANP               | Q8IYJ0  | 196500       | PIANP           | 40       |
| 14115-34_3  | SL002782 | Adrenomedullin                                                      | Adrenomedullin      | P35318  | 133          | ADM             | 1        |
| 14116-129_3 | SL004821 | Protein S100-A4                                                     | S100A4              | P26447  | 6275         | S100A4          | 1        |
| 14120-2_3   | SL018629 | E3 ubiquitin-protein ligase RNF43                                   | RNF43               | Q68DV7  | 54894        | RNF43           | 1        |
| 14121-24_3  | SL004159 | Tumor necrosis factor receptor superfamily member 10D               | TRAIL R4            | Q9UBN6  | 8793         | TNFRSF10D       | 40       |
| 14122-132_3 | SL018971 | E3 ubiquitin-protein ligase ZNRF3                                   | ZNRF3               | Q9ULT6  | 84133        | ZNRF3           | 40       |
| 14123-34_3  | SL017424 | Platelet receptor Gi24                                              | GI24                | Q9H7M9  |              | C10orf54        | 1        |
| 14124-6_3   | SL004843 | Ephrin-A2                                                           | Ephrin-A2           | O43921  | 1943         | EFNA2           | 1        |
| 14125-5_3   | SL004747 | Apolipoprotein M                                                    | ApoM                | O95445  | 55937        | APOM            | 40       |
| 14127-240_3 | SL001880 | Interferon beta                                                     | IFN-b               | P01574  | 3456         | IFNB1           | 40       |
| 14128-121_3 | SL017106 | Interferon alpha-10                                                 | IFN10               | P01566  | 3446         | IFNA10          | 40       |
| 14129-1_3   | SL019978 | Interferon alpha-7                                                  | IFNA7               | P01567  |              | IFNA7           | 40       |
| 14131-37_3  | SL007274 | Ephrin-B2                                                           | EFNB2               | P52799  | 1948         | EFNB2           | 40       |

Table S1

| SeqId       | Somald   | TargetFullName                                | Target                    | UniProt       | EntrezGeneID | EntrezGeneSymbo | Dilution |
|-------------|----------|-----------------------------------------------|---------------------------|---------------|--------------|-----------------|----------|
| 14132-21_3  | SL020171 | HERV-H LTR-associating protein 2              | HHLA2                     | Q9UM44        |              | HHLA2           | 1        |
| 14133-93_3  | SL000145 | Interleukin-1 receptor type 2                 | IL-1 sRII                 | P27930        | 7850         | IL1R2           | 1        |
| 14134-49_3  | SL015046 | Amphoterin-induced protein 2                  | AMGO2                     | Q86SJ2        | 347902       | AMIGO2          | 40       |
| 14135-3_3   | SL020172 | Relaxin receptor 1                            | RXFP1                     | Q9HBX9        |              | RXFP1           | 40       |
| 14136-234_3 | SL007696 | Complement component C1q receptor             | C1QR1                     | Q9NPY3        | 22918        | CD93            | 1        |
| 14139-16_3  | SL007828 | Neuregulin-4                                  | NRG4                      | Q8WWG1        | 145957       | NRG4            | 40       |
| 14143-8_3   | SL014983 | Histone H2B type 2-E                          | H2B2E                     | Q16778        | 8349         | HIST2H2BE       | 40       |
| 14144-3_3   | SL019979 | Histone H2A type 3                            | H2A3                      | Q7L7L0        |              | HIST3H2A        | 1        |
| 14146-92_3  | SL008158 | Histone H3.1                                  | H31                       | P68431        | 8350         | HIST1H3A        | 40       |
| 14147-50_3  | SL001802 | Interferon gamma                              | IFN-g                     | P01579        | 3458         | IFNG            | 40       |
| 14149-9_3   | SL005179 | Interleukin-36 beta                           | IL-1F8                    | Q9NZH7        | 27177        | IL36B           | 40       |
| 14150-7_3   | SL005177 | Interleukin-36 alpha                          | IL-1F6                    | Q9UHA7        | 27179        | IL36A           | 1        |
| 14151-4_3   | SL015510 | Ubiquitin-like protein ISG15                  | UCRP                      | P05161        | 9636         | ISG15           | 40       |
| 14153-8_3   | SL004139 | Ephrin-A3                                     | Ephrin-A3                 | P52797        | 1944         | EFNA3           | 40       |
| 14156-33_3  | SL004815 | 14-3-3 protein beta/alpha                     | 14-3-3 protein beta/alpha | P31946        | 7529         | YWHAB           | 1        |
| 14157-21_3  | SL004984 | 14-3-3 protein epsilon                        | 14-3-3E                   | P62258        | 7531         | YWHAE           | 40       |
| 14158-17_3  | SL003848 | Annexin A5                                    | Annexin V                 | P08758        | 308          | ANXA5           | 40       |
| 14583-49_3  | SL004357 | Growth/differentiation factor 8               | Myostatin                 | O14793        | 2660         | MSTN            | 1        |
| 2182-54_1   | SL000318 | Complement C4b                                | C4b                       | P0C0L4 P0C0L5 | 720 721      | C4A C4B         | 0.005    |
| 2190-55_1   | SL002662 | Coagulation Factor XI                         | Coagulation Factor XI     | P03951        | 2160         | F11             | 0.005    |
| 2192-63_10  | SL003168 | C-C motif chemokine 27                        | CTACK                     | Q9Y4X3        | 10850        | CCL27           | 40       |
| 2201-17_6   | SL000403 | Endostatin                                    | Endostatin                | P39060        | 80781        | COL18A1         | 1        |
| 2211-9_6    | SL000591 | Metalloproteinase inhibitor 1                 | TIMP-1                    | P01033        | 7076         | TIMP1           | 0.005    |
| 2212-69_1   | SL000053 | Tissue-type plasminogen activator             | tPA                       | P00750        | 5327         | PLAT            | 1        |
| 2247-20_11  | SL004332 | Prokineticin-1                                | EG-VEGF                   | P58294        | 84432        | PROK1           | 40       |
| 2278-61_4   | SL000592 | Metalloproteinase inhibitor 2                 | TIMP-2                    | P16035        | 7077         | TIMP2           | 0.005    |
| 2333-72_1   | SL000584 | Transforming growth factor beta-1             | TGF-b1                    | P01137        | 7040         | TGFB1           | 40       |
| 2358-19_2   | SL003322 | Vascular endothelial growth factor receptor 3 | VEGF sR3                  | P35916        | 2324         | FLT4            | 1        |
| 2381-52_4   | SL000319 | Complement C5                                 | C5                        | P01031        | 727          | C5              | 0.005    |
| 2418-55_9   | SL000276 | Apolipoprotein E                              | Apo E                     | P02649        | 348          | APOE            | 0.005    |
| 2421-7_3    | SL003951 | Brain-derived neurotrophic factor             | BDNF                      | P23560        | 627          | BDNF            | 1        |

Table S1

| <u>SeqId</u> | <u>Somald</u> | <u>TargetFullName</u>                                    | <u>Target</u>       | <u>UniProt</u>    | <u>EntrezGeneID</u> | <u>EntrezGeneSymbo</u> | <u>Dilution</u> |
|--------------|---------------|----------------------------------------------------------|---------------------|-------------------|---------------------|------------------------|-----------------|
| 2429-27_4    | SL000324      | Complement component C8                                  | C8                  | P07357,P07358,P07 | 731 732 733         | C8A C8B C8G            | 40              |
| 2431-17_3    | SL000345      | Cathepsin G                                              | Cathepsin G         | P08311            | 1511                | CTSG                   | 40              |
| 2436-49_4    | SL004016      | C-X-C motif chemokine 16                                 | CXCL16,<br>soluble  | Q9H2A7            | 58191               | CXCL16                 | 1               |
| 2441-2_4     | SL004333      | Fibroblast growth factor 10                              | FGF-10              | O15520            | 2255                | FGF10                  | 40              |
| 2443-10_4    | SL004342      | Fibroblast growth factor 8 isoform B                     | FGF-8B              | P55075            | 2253                | FGF8                   | 40              |
| 2447-7_4     | SL004066      | Group IIE secretory phospholipase A2                     | GIIE                | Q9NZK7            | 30814               | PLA2G2E                | 40              |
| 2449-1_4     | SL004182      | Calcium-dependent phospholipase A2                       | GV                  | P39877            | 5322                | PLA2G5                 | 40              |
| 2468-62_3    | SL000133      | C-C motif chemokine 20                                   | MIP-3a              | P78556            | 6364                | CCL20                  | 40              |
| 2474-54_5    | SL000573      | Serum amyloid P-component                                | SAP                 | P02743            | 325                 | APCS                   | 0.005           |
| 2475-1_3     | SL004010      | Mast/stem cell growth factor receptor Kit                | SCF sR              | P10721            | 3815                | KIT                    | 1               |
| 2480-58_3    | SL003043      | Metalloproteinase inhibitor 3                            | TIMP-3              | P35625            | 7078                | TIMP3                  | 1               |
| 2500-2_3     | SL004643      | Angiopoietin-4                                           | Angiopoieti<br>n-4  | Q9Y264            | 51378               | ANGPT4                 | 40              |
| 2501-51_3    | SL000055      | Cadherin-1                                               | Cadherin E          | P12830            | 999                 | CDH1                   | 1               |
| 2505-49_3    | SL004144      | GDNF family receptor alpha-3                             | GFRa-3              | O60609            | 2676                | GFRA3                  | 40              |
| 2514-65_3    | SL004142      | Ephrin-B3                                                | Ephrin-B3           | Q15768            | 1949                | EFNB3                  | 40              |
| 2515-14_3    | SL004143      | GDNF family receptor alpha-2                             | GFRa-2              | O00451            | 2675                | GFRA2                  | 1               |
| 2516-57_3    | SL003193      | C-C motif chemokine 21                                   | 6Ckine              | O00585            | 6366                | CCL21                  | 1               |
| 2524-56_3    | SL003280      | High mobility group protein B1                           | HMG-1               | P09429            | 3146                | HMGB1                  | 1               |
| 2526-53_3    | SL002539      | Tumor necrosis factor receptor superfamily<br>member 11B | OPG                 | O00300            | 4982                | TNFRSF11B              | 40              |
| 2558-51_3    | SL000300      | Beta-endorphin                                           | b-Endorphin         | P01189            | 5443                | POMC                   | 40              |
| 2567-5_6     | SL003328      | Complement factor I                                      | Factor I            | P05156            | 3426                | CFI                    | 0.005           |
| 2571-12_3    | SL000045      | Insulin-like growth factor-binding protein 3             | IGFBP-3             | P17936            | 3486                | IGFBP3                 | 0.005           |
| 2578-67_2    | SL000038      | C-C motif chemokine 2                                    | MCP-1               | P13500            | 6347                | CCL2                   | 40              |
| 2579-17_5    | SL000527      | Matrix metalloproteinase-9                               | MMP-9               | P14780            | 4318                | MMP9                   | 0.005           |
| 2580-83_2    | SL001796      | Myeloperoxidase                                          | Myeloperox<br>idase | P05164            | 4353                | MPO                    | 1               |
| 2585-2_5     | SL000546      | Prolactin                                                | PRL                 | P01236            | 5617                | PRL                    | 1               |
| 2597-8_3     | SL000002      | Vascular endothelial growth factor A                     | VEGF                | P15692            | 7422                | VEGFA                  | 1               |

Table S1

| <u>SeqId</u> | <u>Somald</u> | <u>TargetFullName</u>                                                        | <u>Target</u>     | <u>UniProt</u> | <u>EntrezGeneID</u> | <u>EntrezGeneSymbol</u> | <u>Dilution</u> |
|--------------|---------------|------------------------------------------------------------------------------|-------------------|----------------|---------------------|-------------------------|-----------------|
| 2598-9_3     | SL004126      | Tumor necrosis factor receptor superfamily member 9                          | 4-1BB             | Q07011         | 3604                | TNFRSF9                 | 40              |
| 2599-51_2    | SL003735      | Tumor necrosis factor ligand superfamily member 9                            | 4-1BB ligand      | P41273         | 8744                | TNFSF9                  | 40              |
| 2602-2_2     | SL001996      | Angiopoietin-2                                                               | Angiopoietin-2    | O15123         | 285                 | ANGPT2                  | 1               |
| 2603-61_2    | SL003738      | T-lymphocyte activation antigen CD80                                         | B7                | P33681         | 941                 | CD80                    | 40              |
| 2605-49_2    | SL004180      | Tumor necrosis factor receptor superfamily member 8                          | CD30              | P28908         | 943                 | TNFRSF8                 | 40              |
| 2607-54_2    | SL004692      | Cytokine receptor-like factor 1:Cardiotrophin-like cytokine factor 1 Complex | CLF-1/CLC Complex | O75462 Q9UBD9  | 9244 23529          | CRLF1 CLCF1             | 40              |
| 2609-59_2    | SL001777      | Cystatin-C                                                                   | Cystatin C        | P01034         | 1471                | CST3                    | 0.005           |
| 2611-72_2    | SL004136      | Tyrosine-protein kinase receptor TYRO3                                       | Dtk               | Q06418         | 7301                | TYRO3                   | 40              |
| 2612-5_2     | SL004759      | Eukaryotic translation initiation factor 5                                   | eIF-5             | P55010         | 1983                | EIF5                    | 40              |
| 2614-28_2    | SL004140      | Ephrin-A4                                                                    | Ephrin-A4         | P52798         | 1945                | EFNA4                   | 40              |
| 2615-60_2    | SL004141      | Ephrin-A5                                                                    | Ephrin-A5         | P52803         | 1946                | EFNA5                   | 40              |
| 2616-23_18   | SL000009      | Receptor tyrosine-protein kinase erbB-2                                      | ERBB2             | P04626         | 2064                | ERBB2                   | 40              |
| 2617-56_35   | SL002519      | Receptor tyrosine-protein kinase erbB-3                                      | ERBB3             | P21860         | 2065                | ERBB3                   | 1               |
| 2618-10_2    | SL003803      | Receptor tyrosine-protein kinase erbB-4                                      | ERBB4             | Q15303         | 2066                | ERBB4                   | 40              |
| 2619-72_2    | SL001890      | Tumor-associated calcium signal transducer 2                                 | GA733-1 protein   | P09758         | 4070                | TACSTD2                 | 40              |
| 2620-4_2     | SL003872      | Interleukin-6 receptor subunit beta                                          | gp130, soluble    | P40189         | 3572                | IL6ST                   | 1               |
| 2622-18_1    | SL004751      | Heme oxygenase 2                                                             | HO-2              | P30519         | 3163                | HMOX2                   | 40              |
| 2625-53_4    | SL017612      | Heat shock protein HSP 90-alpha/beta                                         | HSP 90a/b         | P07900 P08238  |                     | HSP90AA1 HSP90A         | 1               |
| 2630-12_2    | SL004588      | Interleukin-1 Receptor accessory protein                                     | IL-1 R AcP        | Q9NPH3         | 3556                | IL1RAP                  | 1               |
| 2631-50_2    | SL004147      | Interleukin-10 receptor subunit beta                                         | IL-10 Rb          | Q08334         | 3588                | IL10RB                  | 40              |
| 2632-5_2     | SL004148      | Interleukin-12 receptor subunit beta-1                                       | IL-12 Rb1         | P42701         | 3594                | IL12RB1                 | 40              |
| 2633-52_2    | SL004149      | Interleukin-13 receptor subunit alpha-1                                      | IL-13 Ra1         | P78552         | 3597                | IL13RA1                 | 1               |
| 2634-2_2     | SL003307      | Cytokine receptor common subunit gamma                                       | IL-2 sRg          | P31785         | 3561                | IL2RG                   | 40              |
| 2635-61_2    | SL004646      | Layilin                                                                      | Layilin           | Q6UX15         | 143903              | LAYN                    | 40              |
| 2636-10_2    | SL000509      | Tumor necrosis factor receptor superfamily member 3                          | Lymphotoxin b R   | P36941         | 4055                | LTBR                    | 1               |

Table S1

| SeqId     | Somald   | TargetFullName                                             | Target                              | UniProt       | EntrezGeneID | EntrezGeneSymbo | Dilution |
|-----------|----------|------------------------------------------------------------|-------------------------------------|---------------|--------------|-----------------|----------|
| 2637-77_2 | SL004579 | Macrophage mannose receptor 1                              | Macrophage mannose receptor         | P22897        | 4360         | MRC1            | 1        |
| 2638-12_2 | SL004153 | Macrophage colony-stimulating factor 1 receptor            | GM-CSF R                            | P07333        | 1436         | CSF1R           | 0.005    |
| 2640-3_2  | SL004637 | Macrophage-stimulating protein receptor                    | MSP R                               | Q04912        | 4486         | MST1R           | 40       |
| 2642-4_1  | SL004760 | Platelet-activating factor acetylhydrolase IB subunit beta | PAFAH beta subunit                  | P68402        | 5049         | PAFAH1B2        | 40       |
| 2643-57_2 | SL004183 | Cadherin-3                                                 | P-Cadherin                          | P22223        | 1001         | CDH3            | 1        |
| 2644-11_2 | SL000551 | Protein kinase C alpha type                                | PKC-A                               | P17252        | 5578         | PRKCA           | 40       |
| 2645-54_1 | SL000557 | Protein kinase C zeta type                                 | PKC-Z                               | Q05513        | 5590         | PRKCZ           | 40       |
| 2647-66_2 | SL003648 | Rab GDP dissociation inhibitor beta                        | Rab GDP dissociation inhibitor beta | P50395        | 2665         | GDI2            | 1        |
| 2649-77_2 | SL003178 | Intercellular adhesion molecule 3                          | sICAM-3                             | P32942        | 3385         | ICAM3           | 40       |
| 2652-15_1 | SL002506 | Urokinase plasminogen activator surface receptor           | suPAR                               | Q03405        | 5329         | PLAUR           | 1        |
| 2654-19_1 | SL001992 | Tumor necrosis factor receptor superfamily member 1A       | TNF sR-I                            | P19438        | 7132         | TNFRSF1A        | 1        |
| 2658-27_1 | SL004639 | NT-3 growth factor receptor                                | TrkC                                | Q16288        | 4916         | NTRK3           | 40       |
| 2665-26_2 | SL004672 | Tumor necrosis factor receptor superfamily member 17       | BCMA                                | Q02223        | 608          | TNFRSF17        | 1        |
| 2666-53_2 | SL004081 | Decorin                                                    | Bone proteoglycan II                | P07585        | 1634         | DCN             | 40       |
| 2668-70_2 | SL000337 | Calpain I                                                  | Calpain I                           | P07384 P04632 | 823 826      | CAPN1 CAPNS1    | 1        |
| 2670-67_4 | SL000383 | Creatine kinase M-type                                     | CK-MM                               | P06732        | 1158         | CKM             | 1        |
| 2677-1_1  | SL002644 | Epidermal growth factor receptor                           | ERBB1                               | P00533        | 1956         | EGFR            | 1        |
| 2681-23_2 | SL000441 | Hepatocyte growth factor                                   | HGF                                 | P14210        | 3082         | HGF             | 40       |
| 2682-68_1 | SL000450 | 60 kDa heat shock protein, mitochondrial                   | HSP 60                              | P10809        | 3329         | HSPD1           | 1        |
| 2683-1_2  | SL000456 | Complement C3b, inactivated                                | iC3b                                | P01024        | 718          | C3              | 0.005    |
| 2685-21_2 | SL004676 | Insulin-like growth factor-binding protein 5               | IGFBP-5                             | P24593        | 3488         | IGFBP5          | 0.005    |



Table S1

| <u>SeqId</u> | <u>Somald</u> | <u>TargetFullName</u>                                 | <u>Target</u>              | <u>UniProt</u>     | <u>EntrezGeneID</u> | <u>EntrezGeneSymbo</u> | <u>Dilution</u> |
|--------------|---------------|-------------------------------------------------------|----------------------------|--------------------|---------------------|------------------------|-----------------|
| 2686-67_2    | SL005172      | Insulin-like growth factor-binding protein 6          | IGFBP-6                    | P24592             | 3489                | IGFBP6                 | 0.005           |
| 2687-2_1     | SL001947      | Melanoma-derived growth regulatory protein            | MIA                        | Q16674             | 8190                | MIA                    | 1               |
| 2692-74_2    | SL002528      | Phospholipase A2, membrane associated                 | NPS-PLA2                   | P14555             | 5320                | PLA2G2A                | 1               |
| 2693-20_3    | SL000530      | Oncostatin-M                                          | OSM                        | P13725             | 5008                | OSM                    | 1               |
| 2695-25_1    | SL001721      | Platelet endothelial cell adhesion molecule           | PECAM-1                    | P16284             | 5175                | PECAM1                 | 40              |
| 2696-87_2    | SL004685      | Persephin                                             | Persephin                  | O60542             | 5623                | PSPN                   | 40              |
| 2697-7_2     | SL003041      | Platelet factor 4                                     | PF-4                       | P02776             | 5196                | PF4                    | 0.005           |
| 2700-56_2    | SL000049      | Vitamin K-dependent protein S                         | Protein S                  | P07225             | 5627                | PROS1                  | 0.005           |
| 2704-74_1    | SL004364      | Tumor necrosis factor receptor superfamily member 13B | TACI                       | O14836             | 23495               | TNFRSF13B              | 40              |
| 2705-5_2     | SL003197      | C-C motif chemokine 25                                | TECK                       | O15444             | 6370                | CCL25                  | 40              |
| 2706-69_2    | SL000590      | Thyroxine-binding globulin                            | Thyroxine-Binding Globulin | P05543             | 6906                | SERPINA7               | 0.005           |
| 2708-54_2    | SL004326      | Tumor necrosis factor ligand superfamily member 18    | TNFSF18                    | Q9UNG2             | 8995                | TNFSF18                | 40              |
| 2711-6_2     | SL005153      | Ciliary neurotrophic factor receptor subunit alpha    | CNTFR alpha                | P26992             | 1271                | CNTFR                  | 40              |
| 2714-78_2    | SL003334      | Endothelial monocyte-activating polypeptide 2         | EMAP-2                     | Q12904             | 9255                | AIMP1                  | 1               |
| 2715-25_2    | SL005159      | Erythropoietin receptor                               | EPO-R                      | P19235             | 2057                | EPOR                   | 40              |
| 2719-3_4     | SL004591      | Granulocyte colony-stimulating factor receptor        | G-CSF-R                    | Q99062             | 1441                | CSF3R                  | 40              |
| 2723-9_2     | SL005178      | Interleukin-37                                        | IL-1F7                     | Q9NZH6             | 27178               | IL37                   | 40              |
| 2728-62_2    | SL000497      | Laminin                                               | Laminin                    | P25391, P07942, P1 | 284217 3912 3915    | LAMA1 LAMB1 LA         | 40              |
| 2730-58_2    | SL005199      | MHC class I polypeptide-related sequence A            | MICA                       | Q29983             | 4276                | MICA                   | 40              |
| 2731-29_2    | SL000528      | NADPH--cytochrome P450 reductase                      | NADPH-P450 Oxidoreductase  | P16435             | 5447                | POR                    | 40              |
| 2732-58_3    | SL005235      | Homeobox protein NANOG                                | NANOG                      | Q9H9S0             | 79923               | NANOG                  | 40              |
| 2734-49_4    | SL005206      | Natural cytotoxicity triggering receptor 2            | NKp44                      | O95944             | 9436                | NCR2                   | 40              |
| 2737-22_2    | SL005236      | Protein NOV homolog                                   | NovH                       | P48745             | 4856                | NOV                    | 40              |
| 2741-22_2    | SL005217      | Sialic acid-binding Ig-like lectin 6                  | Siglec-6                   | O43699             | 946                 | SIGLEC6                | 40              |
| 2742-68_2    | SL005218      | Sialic acid-binding Ig-like lectin 7                  | Siglec-7                   | Q9Y286             | 27036               | SIGLEC7                | 1               |

Table S1

| SeqId     | Somald   | TargetFullName                               | Target         | UniProt              | EntrezGeneID     | EntrezGeneSymbol  | Dilution |
|-----------|----------|----------------------------------------------|----------------|----------------------|------------------|-------------------|----------|
| 2743-5_2  | SL005220 | Sonic hedgehog protein                       | Sonic Hedgehog | Q15465               | 6469             | SHH               | 40       |
| 2744-57_2 | SL000467 | Immunoglobulin G                             | IgG            | P01857               | 3500 3501 3502 3 | IGHG1 IGHG2 IGHG3 | 0.005    |
| 2746-56_1 | SL005226 | Cytokine receptor-like factor 2              | TSLP R         | Q9HC73               | 64109            | CRLF2             | 40       |
| 2747-3_2  | SL005229 | NKG2D ligand 3                               | ULBP-3         | Q9BZM4               | 79465            | ULBP3             | 40       |
| 2748-3_2  | SL001938 | Inhibin beta A chain                         | Activin A      | P08476               | 3624             | INHBA             | 40       |
| 2750-3_2  | SL000019 | Apolipoprotein A-I                           | Apo A-I        | P02647               | 335              | APOA1             | 0.005    |
| 2751-16_2 | SL004589 | Azurocidin                                   | Azurocidin     | P20160               | 566              | AZU1              | 40       |
| 2752-62_2 | SL004329 | Growth/differentiation factor 5              | BMP-14         | P43026               | 8200             | GDF5              | 40       |
| 2753-2_2  | SL000309 | Complement C1q subcomponent                  | C1q            | P02745 P02746 P02747 | 712 713 714      | C1QA C1QB C1QC    | 0.005    |
| 2754-50_2 | SL000312 | Complement C3                                | C3             | P01024               | 718              | C3                | 0.005    |
| 2755-8_2  | SL003220 | C3a anaphylatoxin des Arginine               | C3adesArg      | P01024               | 718              | C3                | 0.005    |
| 2760-2_2  | SL004752 | Protein FAM107A                              | DRR1           | O95990               | 11170            | FAM107A           | 40       |
| 2761-49_2 | SL004336 | Fibroblast growth factor 18                  | FGF-18         | O76093               | 8817             | FGF18             | 40       |
| 2762-30_2 | SL004337 | Fibroblast growth factor 19                  | FGF-19         | O95750               | 9965             | FGF19             | 1        |
| 2763-66_2 | SL004338 | Fibroblast growth factor 20                  | FGF-20         | Q9NP95               | 26281            | FGF20             | 40       |
| 2764-20_2 | SL003849 | Fibroblast growth factor 9                   | FGF9           | P31371               | 2254             | FGF9              | 40       |
| 2765-4_3  | SL021043 | Growth/differentiation factor 11/8           | GDF-11/8       | O95390 O14793        |                  | GDF11 MSTN        | 1        |
| 2768-56_2 | SL000440 | Hemopexin                                    | Hemopexin      | P02790               | 3263             | HPX               | 0.005    |
| 2770-51_2 | SL003176 | C-C motif chemokine 1                        | I-309          | P22362               | 6346             | CCL1              | 1        |
| 2771-35_2 | SL000462 | Insulin-like growth factor-binding protein 1 | IGFBP-1        | P08833               | 3484             | IGFBP1            | 1        |
| 2773-50_2 | SL001717 | Interleukin-10                               | IL-10          | P22301               | 3586             | IL10              | 40       |
| 2774-10_3 | SL000474 | Interleukin-16                               | IL-16          | Q14005               | 3603             | IL16              | 1        |
| 2775-54_2 | SL004352 | Interleukin-17F                              | IL-17F         | Q96PD4               | 112744           | IL17F             | 40       |
| 2778-10_2 | SL004347 | Interleukin-22                               | IL-22          | Q9GZX6               | 50616            | IL22              | 1        |
| 2780-35_2 | SL000496 | Lactotransferrin                             | Lactoferrin    | P02788               | 4057             | LTF               | 0.005    |
| 2781-63_2 | SL004356 | C-C motif chemokine 4-like                   | LAG-1          | Q8NHW4               | 388372           | CCL4L1            | 40       |
| 2783-18_2 | SL004355 | C-C motif chemokine 3-like 1                 | LD78-beta      | P16619               | 414062           | CCL3L1            | 1        |
| 2785-15_2 | SL000515 | C-C motif chemokine 8                        | MCP-2          | P80075               | 6355             | CCL8              | 40       |
| 2788-55_1 | SL000524 | Stromelysin-1                                | MMP-3          | P08254               | 4314             | MMP3              | 1        |
| 2789-26_2 | SL000525 | Matrilysin                                   | MMP-7          | P09237               | 4316             | MMP7              | 1        |
| 2790-54_2 | SL003191 | Neutrophil-activating peptide 2              | NAP-2          | P02775               | 5473             | PPBP              | 0.005    |
| 2794-60_2 | SL000581 | Superoxide dismutase [Cu-Zn]                 | SOD            | P00441               | 6647             | SOD1              | 40       |
| 2796-62_2 | SL000424 | Fibrinogen                                   | Fibrinogen     | P02671 P02675 P02676 | 2243 2244 2266   | FGA FGB FGG       | 1        |

Table S1

| SeqId     | Somald   | TargetFullName                                                   | Target                  | UniProt       | EntrezGeneID | EntrezGeneSymbo | Dilution |
|-----------|----------|------------------------------------------------------------------|-------------------------|---------------|--------------|-----------------|----------|
| 2797-56_2 | SL000020 | Apolipoprotein B                                                 | Apo B                   | P04114        | 338          | APOB            | 40       |
| 2805-6_2  | SL004415 | Angiotensin-converting enzyme 2                                  | ACE2                    | Q9BYF1        | 59272        | ACE2            | 40       |
| 2806-49_2 | SL004128 | Activin receptor type-1B                                         | Activin RIB             | P36896        | 91           | ACVR1B          | 40       |
| 2809-25_2 | SL004625 | A disintegrin and metalloproteinase with thrombospondin motifs 4 | ADAMTS-4                | O75173        | 9507         | ADAMTS4         | 40       |
| 2811-27_1 | SL001995 | Angiopoietin-1                                                   | Angiopoietin-1          | Q15389        | 284          | ANGPT1          | 1        |
| 2813-11_2 | SL006924 | Agouti-related protein                                           | ART                     | O00253        | 181          | AGRP            | 40       |
| 2816-50_2 | SL001902 | Basal Cell Adhesion Molecule                                     | BCAM                    | P50895        | 4059         | BCAM            | 40       |
| 2819-23_2 | SL002081 | Cadherin-5                                                       | Cadherin-5              | P33151        | 1003         | CDH5            | 1        |
| 2822-56_2 | SL004726 | CD97 antigen                                                     | CD97                    | P48960        | 976          | CD97            | 40       |
| 2823-7_1  | SL004704 | COMM domain-containing protein 7                                 | COMMD7                  | Q86VX2        | 149951       | COMMD7          | 40       |
| 2826-53_2 | SL004644 | Ectodysplasin-A, secreted form                                   | EDA                     | Q92838        | 1896         | EDA             | 40       |
| 2827-23_2 | SL000427 | Fractalkine                                                      | Fractalkine/<br>CX3CL-1 | P78423        | 6376         | CX3CL1          | 40       |
| 2828-82_2 | SL004645 | Kunitz-type protease inhibitor 1                                 | HAI-1                   | O43278        | 6692         | SPINT1          | 40       |
| 2829-19_2 | SL006915 | Interleukin-27                                                   | IL-27                   | Q8NEV9 Q14213 | 246778 10148 | IL27 EBI3       | 40       |
| 2831-29_1 | SL002763 | Kallikrein-11                                                    | Kallikrein 11           | Q9UBX7        | 11012        | KLK11           | 40       |
| 2833-20_1 | SL003800 | Kallikrein-4                                                     | Kallikrein 4            | Q9Y5K2        | 9622         | KLK4            | 40       |
| 2834-54_1 | SL003915 | Kallikrein-8                                                     | kallikrein 8            | O60259        | 11202        | KLK8            | 40       |
| 2835-1_4  | SL004301 | X-ray repair cross-complementing protein 6                       | Ku70                    | P12956        | 2547         | XRCC6           | 40       |
| 2836-68_2 | SL000695 | Neutrophil gelatinase-associated lipocalin                       | Lipocalin 2             | P80188        | 3934         | LCN2            | 0.005    |
| 2837-3_2  | SL000134 | Hepatocyte growth factor receptor                                | Met                     | P08581        | 4233         | MET             | 1        |
| 2838-53_1 | SL003332 | Matrix metalloproteinase-17                                      | MMP-17                  | Q9ULZ9        | 4326         | MMP17           | 40       |
| 2839-2_1  | SL004649 | Tumor necrosis factor ligand superfamily member 4                | OX40<br>Ligand          | P23510        | 7292         | TNFSF4          | 40       |
| 2841-13_2 | SL004650 | Secreted frizzled-related protein 3                              | sFRP-3                  | Q92765        | 2487         | FRZB            | 1        |
| 2843-13_2 | SL001897 | Kunitz-type protease inhibitor 2                                 | SPINT2                  | O43291        | 10653        | SPINT2          | 40       |
| 2844-53_2 | SL003199 | Tyrosine-protein kinase receptor Tie-1, soluble                  | sTie-1                  | P35590        | 7075         | TIE1            | 1        |
| 2846-24_2 | SL000605 | Ubiquitin+1, truncated mutation for UbB                          | Ubiquitin+1             | P62979        | 6233         | RPS27A          | 1        |
| 2848-2_2  | SL004652 | Wnt inhibitory factor 1                                          | WIF-1                   | Q9Y5W5        | 11197        | WIF1            | 40       |
| 2849-49_1 | SL004768 | Allograft inflammatory factor 1                                  | AIF1                    | P55008        | 199          | AIF1            | 1        |
| 2851-63_3 | SL000320 | C5a anaphylatoxin                                                | C5a                     | P01031        | 727          | C5              | 1        |

Table S1

| SeqId     | Somald   | TargetFullName                                      | Target                  | UniProt | EntrezGeneID | EntrezGeneSymbol | Dilution |
|-----------|----------|-----------------------------------------------------|-------------------------|---------|--------------|------------------|----------|
| 2853-68_2 | SL006911 | Serine/threonine-protein kinase Chk1                | CHK1                    | O14757  | 1111         | CHEK1            | 40       |
| 2855-49_2 | SL000409 | Mitogen-activated protein kinase 3                  | ERK-1                   | P27361  | 5595         | MAPK3            | 1        |
| 2857-70_2 | SL006914 | Glucocorticoid receptor                             | Glucocorticoid receptor | P04150  | 2908         | NR3C1            | 1        |
| 2858-29_2 | SL004725 | Histone acetyltransferase type B catalytic subunit  | Hat1                    | O14929  | 8520         | HAT1             | 40       |
| 2859-69_2 | SL004723 | Histone deacetylase 8                               | HDAC8                   | Q9BY41  | 55869        | HDAC8            | 1        |
| 2860-19_2 | SL004718 | Importin subunit alpha-1                            | Karyopherin alpha2      | P52292  | 3838         | KPNA2            | 1        |
| 2864-2_3  | SL003793 | Dual specificity mitogen-activated protein kinase 1 | MEK1                    | Q02750  | 5604         | MAP2K1           | 40       |
| 2865-77_2 | SL004724 | Histone acetyltransferase KAT6A                     | MOZ                     | Q92794  | 7994         | KAT6A            | 40       |
| 2869-68_3 | SL000554 | Protein kinase C delta type                         | PKC-D                   | Q05655  | 5580         | PRKCD            | 40       |
| 2870-29_2 | SL004009 | Ras-related C3 botulinum toxin substrate 1          | RAC1                    | P63000  | 5879         | RAC1             | 1        |
| 2871-73_2 | SL006922 | DNA repair protein RAD51 homolog 1                  | RAD51                   | Q06609  | 5888         | RAD51            | 40       |
| 2875-15_2 | SL006923 | TATA-box-binding protein                            | TBP                     | P20226  | 6908         | TBP              | 40       |
| 2876-74_2 | SL004305 | DNA topoisomerase 1                                 | Topoisomerase I         | P11387  | 7150         | TOP1             | 40       |
| 2877-3_1  | SL004306 | SUMO-conjugating enzyme UBC9                        | UBC9                    | P63279  | 7329         | UBE2I            | 1        |
| 2878-66_2 | SL006372 | Tyrosine-protein kinase Yes                         | YES                     | P07947  | 7525         | YES1             | 40       |
| 2879-9_2  | SL000248 | Alpha-1-antichymotrypsin                            | alpha1-Antichymotrypsin | P01011  | 12           | SERPINA3         | 0.005    |
| 2888-49_2 | SL000323 | Complement component C7                             | C7                      | P10643  | 730          | C7               | 0.005    |
| 2889-37_2 | SL002783 | Cardiotrophin-1                                     | Cardiotrophin-1         | Q16619  | 1489         | CTF1             | 40       |
| 2890-59_2 | SL003303 | C-C motif chemokine 28                              | CCL28                   | Q9NRJ3  | 56477        | CCL28            | 40       |
| 2891-1_3  | SL004330 | B-cell receptor CD22                                | CD22                    | P20273  | 933          | CD22             | 40       |
| 2900-53_3 | SL003329 | C-C motif chemokine 14                              | HCC-1                   | Q16627  | 6358         | CCL14            | 1        |
| 2906-55_3 | SL000480 | Interleukin-4                                       | IL-4                    | P05112  | 3565         | IL4              | 40       |
| 2911-27_2 | SL002621 | Midkine                                             | Midkine                 | P21741  | 4192         | MDK              | 40       |
| 2913-1_2  | SL003302 | C-C motif chemokine 23                              | MPIF-1                  | P55773  | 6368         | CCL23            | 1        |
| 2915-6_2  | SL000131 | Proliferating cell nuclear antigen                  | PCNA                    | P12004  | 5111         | PCNA             | 40       |

Table S1

| SeqId     | Somald   | TargetFullName                                     | Target                  | UniProt        | EntrezGeneID | EntrezGeneSymbo | Dilution |
|-----------|----------|----------------------------------------------------|-------------------------|----------------|--------------|-----------------|----------|
| 2917-3_2  | SL002541 | Tumor necrosis factor ligand superfamily member 11 | sRANKL                  | O14788         | 8600         | TNFSF11         | 40       |
| 2925-9_1  | SL000006 | Plasminogen activator inhibitor 1                  | PAI-1                   | P05121         | 5054         | SERPINE1        | 1        |
| 2937-10_2 | SL004668 | Apolipoprotein E (isoform E3)                      | Apo E3                  | P02649         | 348          | APOE            | 0.005    |
| 2938-55_2 | SL004669 | Apolipoprotein E (isoform E4)                      | Apo E4                  | P02649         | 348          | APOE            | 0.005    |
| 2939-10_2 | SL004670 | Artemin                                            | Artemin                 | Q5T4W7         | 9048         | ARTN            | 40       |
| 2942-50_2 | SL000396 | Cytochrome c                                       | Cytochrome c            | P99999         | 54205        | CYCS            | 1        |
| 2943-5_2  | SL000398 | Cytochrome P450 3A4                                | Cytochrome P450 3A4     | P08684         | 1576         | CYP3A4          | 0.005    |
| 2944-66_2 | SL005156 | Neuroblastoma suppressor of tumorigenicity 1       | DAN                     | P41271         | 4681         | NBL1            | 40       |
| 2945-25_1 | SL000007 | Estrogen receptor                                  | ER                      | P03372         | 2099         | ESR1            | 40       |
| 2946-52_2 | SL003327 | Complement factor D                                | Factor D                | P00746         | 1675         | CFD             | 0.005    |
| 2948-58_2 | SL005168 | Growth hormone receptor                            | Growth hormone receptor | P10912         | 2690         | GHR             | 1        |
| 2949-6_2  | SL004067 | Group 10 secretory phospholipase A2                | GX                      | O15496         | 8399         | PLA2G10         | 40       |
| 2950-57_2 | SL005171 | Insulin-like growth factor-binding protein 4       | IGFBP-4                 | P22692         | 3487         | IGFBP4          | 0.005    |
| 2952-75_2 | SL000047 | Insulin-like growth factor I                       | IGF-I                   | P05019         | 3479         | IGF1            | 0.005    |
| 2953-31_2 | SL000506 | Luteinizing hormone                                | Luteinizing hormone     | P01215, P01229 | 1081 3972    | CGA LHB         | 1        |
| 2960-66_2 | SL003192 | Properdin                                          | Properdin               | P27918         | 5199         | CFP             | 0.005    |
| 2961-1_2  | SL000048 | Vitamin K-dependent protein C                      | Protein C               | P04070         | 5624         | PROC            | 0.005    |
| 2962-50_2 | SL002561 | Parathyroid hormone-related protein                | PTHrP                   | P12272         | 5744         | PTHLH           | 40       |
| 2966-65_2 | SL004362 | Stem Cell Growth Factor-beta                       | SCGF-beta               | Q9Y240         | 6320         | CLEC11A         | 1        |
| 2967-8_1  | SL001720 | Vascular cell adhesion protein 1                   | VCAM-1                  | P19320         | 7412         | VCAM1           | 1        |
| 2968-61_1 | SL004686 | Tumor necrosis factor ligand superfamily member 15 | TNFSF15                 | O95150         | 9966         | TNFSF15         | 40       |
| 2969-11_1 | SL004851 | Serine/threonine-protein kinase receptor R3        | ALK-1                   | P37023         | 94           | ACVRL1          | 40       |
| 2970-60_2 | SL000136 | Amphiregulin                                       | AREG                    | P15514         | 374          | AREG            | 40       |
| 2972-57_2 | SL004078 | Bone morphogenetic protein 7                       | BMP-7                   | P18075         | 655          | BMP7            | 40       |
| 2973-15_2 | SL000668 | Platelet glycoprotein 4                            | CD36<br>ANTIGEN         | P16671         | 948          | CD36            | 40       |
| 2974-61_2 | SL004855 | Contactin-1                                        | contactin-1             | Q12860         | 1272         | CNTN1           | 1        |

Table S1

| SeqId     | Somald   | TargetFullName                                         | Target                 | UniProt       | EntrezGeneID | EntrezGeneSymbo | Dilution |
|-----------|----------|--------------------------------------------------------|------------------------|---------------|--------------|-----------------|----------|
| 2975-19_2 | SL002655 | Connective tissue growth factor                        | CTGF                   | P29279        | 1490         | CTGF            | 40       |
| 2976-58_2 | SL004856 | Desmoglein-1                                           | Desmoglein-1           | Q02413        | 1828         | DSG1            | 1        |
| 2977-7_2  | SL004872 | Tumor necrosis factor receptor superfamily member EDAR | EDAR                   | Q9UNE0        | 10913        | EDAR            | 40       |
| 2979-8_2  | SL003169 | C-X-C motif chemokine 5                                | ENA-78                 | P42830        | 6374         | CXCL5           | 40       |
| 2981-9_3  | SL005160 | Endothelial cell-selective adhesion molecule           | ESAM                   | Q96AP7        | 90952        | ESAM            | 1        |
| 2982-82_2 | SL005165 | Galectin-4                                             | Galectin-4             | P56470        | 3960         | LGALS4          | 40       |
| 2985-35_1 | SL003173 | Growth-regulated alpha protein                         | Gro-a                  | P09341        | 2919         | CXCL1           | 1        |
| 2986-49_2 | SL017610 | Gro-beta/gamma                                         | Gro-b/g                | P19876 P19875 |              | CXCL3 CXCL2     | 1        |
| 2987-37_3 | SL005256 | Histone H1.2                                           | Histone H1.2           | P16403        | 3006         | HIST1H1C        | 40       |
| 2988-57_2 | SL005170 | Inducible T-cell costimulator                          | ICOS                   | Q9Y6W8        | 29851        | ICOS            | 40       |
| 2991-9_2  | SL001997 | Interleukin-1 receptor type 1                          | IL-1 sRI               | P14778        | 3554         | IL1R1           | 40       |
| 2992-59_2 | SL004850 | Interleukin-17 receptor A                              | IL-17 sR               | Q96F46        | 23765        | IL17RA          | 1        |
| 2993-1_2  | SL004861 | Interleukin-18 receptor accessory protein              | IL-18 Rb               | Q95256        | 8807         | IL18RAP         | 40       |
| 2994-71_2 | SL004875 | Interleukin-1 receptor-like 2                          | IL-1Rrp2               | Q9HB29        | 8808         | IL1RL2          | 40       |
| 2997-8_1  | SL005193 | Junctional adhesion molecule B                         | JAM-B                  | P57087        | 58494        | JAM2            | 1        |
| 2998-53_2 | SL005194 | Junctional adhesion molecule C                         | JAM-C                  | Q9BX67        | 83700        | JAM3            | 40       |
| 2999-6_2  | SL005196 | Limbic system-associated membrane protein              | LSAMP                  | Q13449        | 4045         | LSAMP           | 1        |
| 3000-66_1 | SL004516 | Mannose-binding protein C                              | MBL                    | P11226        | 4153         | MBL2            | 1        |
| 3003-29_2 | SL005205 | Natural cytotoxicity triggering receptor 3             | NKp30                  | O14931        | 259197       | NCR3            | 40       |
| 3004-67_2 | SL004862 | Programmed cell death 1 ligand 2                       | PD-L2                  | Q9BQ51        | 80380        | PDCD1LG2        | 40       |
| 3005-5_2  | SL004939 | Tyrosine-protein phosphatase non-receptor type 1       | PTP-1B                 | P18031        | 5770         | PTPN1           | 1        |
| 3007-7_2  | SL005219 | Sialic acid-binding Ig-like lectin 9                   | Siglec-9               | Q9Y336        | 27180        | SIGLEC9         | 1        |
| 3009-3_2  | SL005059 | Transforming growth factor beta receptor type 3        | TGF- $\beta$ R III     | Q03167        | 7049         | TGFB3           | 1        |
| 3010-53_2 | SL004687 | Thymic stromal lymphopoietin                           | TSLP                   | Q969D9        | 85480        | TSLP            | 40       |
| 3022-4_2  | SL000384 | Cytotoxic T-lymphocyte protein 4                       | CTLA-4                 | P16410        | 1493         | CTLA4           | 40       |
| 3024-18_2 | SL000250 | Alpha-2-antiplasmin                                    | $\alpha$ 2-Antiplasmin | P08697        | 5345         | SERPINF2        | 0.005    |
| 3025-50_1 | SL000004 | Fibroblast growth factor 2                             | bFGF                   | P09038        | 2247         | FGF2            | 40       |

Table S1

| <b>SeqId</b> | <b>Somald</b> | <b>TargetFullName</b>                                           | <b>Target</b>           | <b>UniProt</b> | <b>EntrezGeneID</b> | <b>EntrezGeneSymbo</b> | <b>Dilution</b> |
|--------------|---------------|-----------------------------------------------------------------|-------------------------|----------------|---------------------|------------------------|-----------------|
| 3026-5_2     | SL000338      | Calpastatin                                                     | Calpastatin             | P20810         | 831                 | CAST                   | 1               |
| 3028-36_2    | SL003301      | Ck-beta-8-1                                                     | Ck-b-8-1                | P55773         | 6368                | CCL23                  | 40              |
| 3029-52_2    | SL005157      | CD209 antigen                                                   | DC-SIGN                 | Q9NNX6         | 30835               | CD209                  | 1               |
| 3030-3_2     | SL005158      | C-type lectin domain family 4 member M                          | DC-SIGNR                | Q9H2X3         | 10332               | CLEC4M                 | 0.005           |
| 3032-11_2    | SL000428      | Follicle stimulating hormone                                    | FSH                     | P01215, P01225 | 1081 2488           | CGA FSHB               | 1               |
| 3033-57_1    | SL005164      | Galectin-2                                                      | Galectin-2              | P05162         | 3957                | LGALS2                 | 40              |
| 3034-1_2     | SL004271      | Glial fibrillary acidic protein                                 | GFAP                    | P14136         | 2670                | GFAP                   | 40              |
| 3035-80_2    | SL004354      | Interleukin-19                                                  | IL-19                   | Q9UHD0         | 29949               | IL19                   | 1               |
| 3037-62_1    | SL001795      | Interleukin-1 beta                                              | IL-1b                   | P01584         | 3553                | IL1B                   | 1               |
| 3038-9_2     | SL003326      | C-X-C motif chemokine 11                                        | I-TAC                   | O14625         | 6373                | CXCL11                 | 40              |
| 3040-59_1    | SL000519      | C-C motif chemokine 3                                           | MIP-1a                  | P10147         | 6348                | CCL3                   | 40              |
| 3041-55_2    | SL008416      | C-type mannose receptor 2                                       | MRC2                    | Q9UBG0         | 9902                | MRC2                   | 1               |
| 3042-7_2     | SL000164      | Myoglobin                                                       | Myoglobin               | P02144         | 4151                | MB                     | 1               |
| 3043-49_2    | SL000532      | SPARC                                                           | ON                      | P09486         | 6678                | SPARC                  | 0.005           |
| 3044-3_2     | SL003323      | C-C motif chemokine 18                                          | PARC                    | P55774         | 6362                | CCL18                  | 0.005           |
| 3045-72_2    | SL002704      | Pleiotrophin                                                    | PTN                     | P21246         | 5764                | PTN                    | 1               |
| 3046-31_1    | SL004260      | Resistin                                                        | resistin                | Q9HD89         | 56729               | RETN                   | 1               |
| 3049-61_2    | SL000603      | Trypsin-1                                                       | Trypsin                 | P07477         | 5644                | PRSS1                  | 1               |
| 3050-7_2     | SL000017      | von Willebrand factor                                           | vWF                     | P04275         | 7450                | VWF                    | 0.005           |
| 3052-8_2     | SL000633      | Tumor necrosis factor ligand superfamily member 6, soluble form | Fas ligand, soluble     | P48023         | 356                 | FASLG                  | 40              |
| 3053-49_2    | SL004343      | Fms-related tyrosine kinase 3 ligand                            | Flt3 ligand             | P49771         | 2323                | FLT3LG                 | 40              |
| 3054-3_2     | SL000437      | Haptoglobin                                                     | Haptoglobin, Mixed Type | P00738         | 3240                | HP                     | 0.005           |
| 3055-54_2    | SL003308      | Interleukin-4 receptor subunit alpha                            | IL-4 sR                 | P24394         | 3566                | IL4R                   | 40              |
| 3056-11_1    | SL005204      | NKG2-D type II integral membrane protein                        | NKG2D                   | P26718         | 22914               | KLRK1                  | 40              |
| 3057-55_1    | SL004689      | WNT1-inducible-signaling pathway protein 1                      | WISP-1                  | O95388         | 8840                | WISP1                  | 0.005           |
| 3059-50_2    | SL004327      | Tumor necrosis factor ligand superfamily member 13B             | BAFF                    | Q9Y275         | 10673               | TNFSF13B               | 40              |
| 3060-43_2    | SL000325      | Complement component C9                                         | C9                      | P02748         | 735                 | C9                     | 0.005           |
| 3061-61_2    | SL000343      | Cathepsin B                                                     | Cathepsin B             | P07858         | 1508                | CTSB                   | 1               |
| 3065-65_1    | SL004339      | Fibroblast growth factor 5                                      | FGF-5                   | P12034         | 2250                | FGF5                   | 40              |
| 3066-12_1    | SL003744      | Galectin-3                                                      | Galectin-3              | P17931         | 3958                | LGALS3                 | 1               |

Table S1

| <u>SeqId</u> | <u>Somald</u> | <u>TargetFullName</u>                                               | <u>Target</u>                   | <u>UniProt</u> | <u>EntrezGeneID</u> | <u>EntrezGeneSymbol</u> | <u>Dilution</u> |
|--------------|---------------|---------------------------------------------------------------------|---------------------------------|----------------|---------------------|-------------------------|-----------------|
| 3067-67_1    | SL005234      | Growth/differentiation factor 9                                     | GDF-9                           | O60383         | 2661                | GDF9                    | 40              |
| 3069-52_3    | SL000468      | Immunoglobulin M                                                    | IgM                             | P01871         | 3507 3512 50802     | IGHM IGJ IGK@ IGL       | 0.005           |
| 3070-1_2     | SL000478      | Interleukin-2                                                       | IL-2                            | P60568         | 3558                | IL2                     | 40              |
| 3072-4_2     | SL001718      | Interleukin-13                                                      | IL-13                           | P35225         | 3596                | IL13                    | 40              |
| 3073-51_2    | SL002508      | Interleukin-18-binding protein                                      | IL-18 BPa                       | O95998         | 10068               | IL18BP                  | 40              |
| 3074-6_2     | SL003309      | Lipopolysaccharide-binding protein                                  | LBP                             | P18428         | 3929                | LBP                     | 0.005           |
| 3077-66_2    | SL003324      | Coagulation factor Xa                                               | Coagulation<br>Factor Xa        | P00742         | 2159                | F10                     | 0.005           |
| 3078-1_2     | SL002640      | Placenta growth factor                                              | PIGF                            | P49763         | 5228                | PGF                     | 40              |
| 3079-62_2    | SL005152      | Retinoic acid receptor responder protein 2                          | TIG2                            | Q99969         | 5919                | RARRES2                 | 0.005           |
| 3081-70_2    | SL005227      | NKG2D ligand 1                                                      | ULBP-1                          | Q9BZM6         | 80329               | ULBP1                   | 40              |
| 3082-9_2     | SL005228      | NKG2D ligand 2                                                      | ULBP-2                          | Q9BZM5         | 80328               | ULBP2                   | 40              |
| 3083-71_1    | SL005233      | Tumor necrosis factor receptor superfamily<br>member 27             | XEDAR                           | Q9HAV5         | 60401               | EDA2R                   | 40              |
| 3091-70_2    | SL004771      | Aurora kinase A                                                     | Aurora<br>kinase A              | O14965         | 6790                | AURKA                   | 40              |
| 3115-64_2    | SL006918      | Mitogen-activated protein kinase 1                                  | MK01                            | P28482         | 5594                | MAPK1                   | 40              |
| 3122-6_2     | SL003733      | Diablo homolog, mitochondrial                                       | SMAC                            | Q9NR28         | 56616               | DIABLO                  | 1               |
| 3132-1_1     | SL004486      | Vascular endothelial growth factor C                                | VEGF-C                          | P49767         | 7424                | VEGFC                   | 40              |
| 3143-3_1     | SL002524      | T-cell surface glycoprotein CD4                                     | sCD4                            | P01730         | 920                 | CD4                     | 40              |
| 3151-6_1     | SL003305      | Interleukin-2 receptor subunit alpha                                | IL-2 sRa                        | P01589         | 3559                | IL2RA                   | 40              |
| 3152-57_1    | SL001800      | Tumor necrosis factor receptor superfamily<br>member 1B             | TNF sR-II                       | P20333         | 7133                | TNFRSF1B                | 1               |
| 3166-92_1    | SL005215      | Myeloid cell surface antigen CD33                                   | Siglec-3                        | P20138         | 945                 | CD33                    | 40              |
| 3168-8_2     | SL004626      | A disintegrin and metalloproteinase with<br>thrombospondin motifs 5 | ADAMTS-5                        | Q9UNA0         | 11096               | ADAMTS5                 | 40              |
| 3169-70_2    | SL010368      | Alpha-L-iduronidase                                                 | IDUA                            | P35475         | 3425                | IDUA                    | 1               |
| 3170-6_1     | SL007261      | Methionine aminopeptidase 2                                         | AMPM2                           | P50579         | 10988               | METAP2                  | 40              |
| 3171-57_2    | SL004469      | Amyloid beta A4 protein                                             | amyloid<br>precursor<br>protein | P05067         | 351                 | APP                     | 0.005           |
| 3172-28_2    | SL008956      | Arylsulfatase B                                                     | ARSB                            | P15848         | 411                 | ARSB                    | 1               |
| 3173-49_2    | SL008611      | N-acylethanolamine-hydrolyzing acid amidase                         | ASAHL                           | Q02083         | 27163               | NAAA                    | 40              |



Table S1

| SeqId     | Somald   | TargetFullName                                                         | Target                     | UniProt | EntrezGeneID | EntrezGeneSymbo | Dilution |
|-----------|----------|------------------------------------------------------------------------|----------------------------|---------|--------------|-----------------|----------|
| 3174-2_1  | SL008421 | A disintegrin and metalloproteinase with thrombospondin motifs 1       | ATS1                       | Q9UHI8  | 9510         | ADAMTS1         | 40       |
| 3175-51_5 | SL006610 | A disintegrin and metalloproteinase with thrombospondin motifs 13      | ATS13                      | Q76LX8  | 11093        | ADAMTS13        | 1        |
| 3177-49_2 | SL010369 | Carbonic anhydrase 4                                                   | Carbonic Anhydrase IV      | P22748  | 762          | CA4             | 40       |
| 3178-5_2  | SL007280 | Dipeptidyl peptidase 1                                                 | CATC                       | P53634  | 1075         | CTSC            | 40       |
| 3179-51_2 | SL009213 | Lysosomal protective protein                                           | Cathepsin A                | P10619  | 5476         | CTSA            | 1        |
| 3181-50_2 | SL004673 | Cathepsin S                                                            | Cathepsin S                | P25774  | 1520         | CTSS            | 1        |
| 3182-38_2 | SL010371 | Ectonucleoside triphosphate diphosphohydrolase 1                       | CD39                       | P49961  | 953          | ENTPD1          | 1        |
| 3184-25_2 | SL000358 | Coagulation factor VII                                                 | Coagulation Factor VII     | P08709  | 2155         | F7              | 0.005    |
| 3186-2_2  | SL002525 | Complement C2                                                          | C2                         | P06681  | 717          | C2              | 0.005    |
| 3187-52_2 | SL007284 | Cysteine-rich secretory protein 3                                      | CRIS3                      | P54108  | 10321        | CRISP3          | 40       |
| 3189-61_2 | SL010372 | Enteropeptidase                                                        | Enterokinase               | P98073  | 5651         | TMPRSS15        | 40       |
| 3191-50_2 | SL012783 | WAP, kazal, immunoglobulin, kunitz and NTR domain-containing protein 1 | WFKN1                      | Q96NZ8  | 117166       | WFIKKN1         | 40       |
| 3192-3_2  | SL002695 | Cytosolic non-specific dipeptidase                                     | Glutamate carboxypeptidase | Q96KP4  | 55748        | CNDP2           | 40       |
| 3194-36_2 | SL008759 | Platelet glycoprotein VI                                               | GPVI                       | Q9HCN6  | 51206        | GP6             | 1        |
| 3195-50_2 | SL000678 | Granulysin                                                             | Granulysin                 | P22749  | 10578        | GNLY            | 1        |
| 3196-6_2  | SL008023 | Hyaluronan and proteoglycan link protein 1                             | HPLN1                      | P10915  | 1404         | HAPLN1          | 40       |
| 3197-70_2 | SL007122 | Insulin-degrading enzyme                                               | IDE                        | P14735  | 3416         | IDE             | 40       |
| 3198-4_1  | SL008639 | Iduronate 2-sulfatase                                                  | IDS                        | P22304  | 3423         | IDS             | 1        |
| 3199-54_2 | SL003916 | Kallikrein-12                                                          | kallikrein 12              | Q9UKR0  | 43849        | KLK12           | 1        |
| 3200-49_2 | SL003918 | Kallikrein-13                                                          | kallikrein 13              | Q9UKR3  | 26085        | KLK13           | 40       |
| 3201-49_2 | SL003863 | Kallikrein-5                                                           | kallikrein 5               | Q9Y337  | 25818        | KLK5            | 0.005    |

Table S1

| SeqId     | Somald   | TargetFullName                                                         | Target               | UniProt | EntrezGeneID | EntrezGeneSymbo | Dilution |
|-----------|----------|------------------------------------------------------------------------|----------------------|---------|--------------|-----------------|----------|
| 3202-28_2 | SL010393 | Kremen protein 2                                                       | KREM2                | Q8NCW0  | 79412        | KREMEN2         | 40       |
| 3204-2_2  | SL007100 | Leukotriene A-4 hydrolase                                              | LKHA4                | P09960  | 4048         | LTA4H           | 40       |
| 3206-4_2  | SL008904 | Lymphatic vessel endothelial hyaluronic acid receptor 1                | LYVE1                | Q9Y5Y7  | 10894        | LYVE1           | 0.005    |
| 3208-2_4  | SL006992 | Matrilin-3                                                             | MATN3                | O15232  | 4148         | MATN3           | 40       |
| 3209-69_1 | SL005437 | Matrix extracellular phosphoglycoprotein                               | MEPE                 | Q9NQ76  | 56955        | MEPE            | 40       |
| 3210-1_2  | SL010374 | Methionine aminopeptidase 1                                            | METAP1               | P53582  | 23173        | METAP1          | 40       |
| 3212-30_3 | SL010375 | Neutral ceramidase                                                     | ASAH2                | Q9NR71  | 56624        | ASAH2           | 40       |
| 3213-65_2 | SL000640 | Nidogen-1                                                              | Nidogen              | P14543  | 4811         | NID1            | 1        |
| 3216-2_2  | SL005797 | Polymeric immunoglobulin receptor                                      | PIGR                 | P01833  | 5284         | PIGR            | 1        |
| 3217-74_2 | SL004457 | Glia-derived nexin                                                     | Protease nexin I     | P07093  | 5270         | SERPINE2        | 0.005    |
| 3220-40_2 | SL010378 | Proto-oncogene tyrosine-protein kinase receptor Ret                    | RET                  | P07949  | 5979         | RET             | 1        |
| 3221-54_1 | SL003770 | Secreted frizzled-related protein 1                                    | SARP-2               | Q8N474  | 6422         | SFRP1           | 40       |
| 3222-11_2 | SL010379 | Semaphorin-3A                                                          | Semaphorin 3A        | Q14563  | 10371        | SEMA3A          | 40       |
| 3232-28_2 | SL004118 | Tartrate-resistant acid phosphatase type 5                             | TrATPase             | P13686  | 54           | ACP5            | 1        |
| 3234-23_2 | SL010390 | Coiled-coil domain-containing protein 80                               | URB                  | Q76M96  | 151887       | CCDC80          | 1        |
| 3235-50_2 | SL010391 | WAP, Kazal, immunoglobulin, Kunitz and NTR domain-containing protein 2 | WFKN2                | Q8TEU8  | 124857       | WFIKKN2         | 40       |
| 3280-49_2 | SL004661 | Aggrecan core protein                                                  | Aggrecan             | P16112  | 176          | ACAN            | 40       |
| 3281-19_1 | SL006803 | Angiopoietin-related protein 3                                         | ANGL3                | Q9Y5C1  | 27329        | ANGPTL3         | 40       |
| 3283-21_1 | SL006544 | Transforming growth factor-beta-induced protein ig-h3                  | BGH3                 | Q15582  | 7045         | TGFBI           | 1        |
| 3284-75_1 | SL007804 | Biglycan                                                               | BGN                  | P21810  | 633          | BGN             | 40       |
| 3285-23_2 | SL000310 | Complement C1r subcomponent                                            | C1r                  | P00736  | 715          | C1R             | 0.005    |
| 3289-19_2 | SL010449 | Carbonic anhydrase-related protein 10                                  | Carbonic Anhydrase X | Q9NS85  | 56934        | CA10            | 40       |
| 3290-50_2 | SL008773 | CD109 antigen                                                          | CD109                | Q6YHK3  | 135228       | CD109           | 40       |
| 3291-30_2 | SL002706 | Low affinity immunoglobulin epsilon Fc receptor                        | CD23                 | P06734  | 2208         | FCER2           | 1        |
| 3292-75_1 | SL010450 | CD48 antigen                                                           | CD48                 | P09326  | 962          | CD48            | 1        |

Table S1

| <u>SeqId</u> | <u>Somald</u> | <u>TargetFullName</u>                                          | <u>Target</u>         | <u>UniProt</u> | <u>EntrezGeneID</u> | <u>EntrezGeneSymbo</u> | <u>Dilution</u> |
|--------------|---------------|----------------------------------------------------------------|-----------------------|----------------|---------------------|------------------------|-----------------|
| 3293-2_4     | SL006108      | CD5 antigen-like                                               | CD5L                  | O43866         | 922                 | CD5L                   | 0.005           |
| 3294-55_2    | SL010451      | Cryptic protein                                                | CFC1                  | P0CG37         | 55997               | CFC1                   | 40              |
| 3296-92_2    | SL008623      | Contactin-2                                                    | CNTN2                 | Q02246         | 6900                | CNTN2                  | 40              |
| 3298-52_2    | SL010454      | Contactin-4                                                    | Contactin-4           | Q8I WV2        | 152330              | CNTN4                  | 1               |
| 3299-29_2    | SL010455      | Contactin-5                                                    | Contactin-5           | O94779         | 53942               | CNTN5                  | 40              |
| 3302-58_1    | SL007049      | Cystatin-F                                                     | CYTF                  | O76096         | 8530                | CST7                   | 1               |
| 3303-23_2    | SL004438      | Cystatin-M                                                     | Cystatin M            | Q15828         | 1474                | CST6                   | 1               |
| 3305-6_1     | SL010457      | Delta-like protein 4                                           | DLL4                  | Q9NR61         | 54567               | DLL4                   | 1               |
| 3309-2_2     | SL010459      | Low affinity immunoglobulin gamma Fc region receptor II-a      | FCG2A                 | P12318         | 2212                | FCGR2A                 | 1               |
| 3310-62_1    | SL010460      | Low affinity immunoglobulin gamma Fc region receptor II-b      | FCG2B                 | P31994         | 2213                | FCGR2B                 | 1               |
| 3311-27_1    | SL008609      | Low affinity immunoglobulin gamma Fc region receptor III-B     | FCG3B                 | O75015         | 2215                | FCGR3B                 | 0.005           |
| 3312-64_1    | SL010461      | High affinity immunoglobulin gamma Fc receptor I               | FCGR1                 | P12314         | 2209                | FCGR1A                 | 40              |
| 3313-21_2    | SL006542      | Ficolin-2                                                      | FCN2                  | Q15485         | 2220                | FCN2                   | 1               |
| 3314-74_2    | SL004858      | GDNF family receptor alpha-1                                   | GFRA-1                | P56159         | 2674                | GFRA1                  | 40              |
| 3315-15_1    | SL010463      | Glypican-2                                                     | GPC2                  | Q8N158         | 221914              | GPC2                   | 40              |
| 3316-58_1    | SL004466      | Heparin cofactor 2                                             | Heparin cofactor II   | P05546         | 3053                | SERPIND1               | 0.005           |
| 3317-33_1    | SL004860      | Serine protease HTRA2, mitochondrial                           | HTRA2                 | O43464         | 27429               | HTRA2                  | 40              |
| 3320-49_2    | SL005087      | Insulin-like growth factor-binding protein 7                   | IGFBP-7               | Q16270         | 3490                | IGFBP7                 | 1               |
| 3321-2_2     | SL007385      | Interleukin-24                                                 | IL24                  | Q13007         | 11009               | IL24                   | 40              |
| 3322-52_2    | SL010464      | Leucine-rich repeats and immunoglobulin-like domains protein 3 | LRIG3                 | Q6UXM1         | 121227              | LRIG3                  | 40              |
| 3323-37_1    | SL004610      | Low-density lipoprotein receptor-related protein 8             | LRP8                  | Q14114         | 7804                | LRP8                   | 40              |
| 3324-51_1    | SL007674      | T-lymphocyte surface antigen Ly-9                              | LY9                   | Q9HBG7         | 4063                | LY9                    | 40              |
| 3325-2_2     | SL010465      | Matrilin-2                                                     | MATN2                 | O00339         | 4147                | MATN2                  | 1               |
| 3326-58_2    | SL004805      | Cell adhesion molecule 1                                       | Nectin-like protein 2 | Q9BY67         | 23705               | CADM1                  | 40              |
| 3327-27_1    | SL007673      | Netrin-4                                                       | NET4                  | Q9HB63         | 59277               | NTN4                   | 1               |
| 3329-14_2    | SL004515      | Peptidoglycan recognition protein 1                            | PGRP-S                | O75594         | 8993                | PGLYRP1                | 1               |

Table S1

| <u>SeqId</u> | <u>Somald</u> | <u>TargetFullName</u>                                                   | <u>Target</u>          | <u>UniProt</u> | <u>EntrezGeneID</u> | <u>EntrezGeneSymbo</u> | <u>Dilution</u> |
|--------------|---------------|-------------------------------------------------------------------------|------------------------|----------------|---------------------|------------------------|-----------------|
| 3331-8_1     | SL010468      | RGM domain family member B                                              | RGMB                   | Q6NW40         | 285704              | RGMB                   | 1               |
| 3332-57_1    | SL010469      | Hemojuvelin                                                             | RGM-C                  | Q6ZVN8         | 148738              | HFE2                   | 1               |
| 3336-50_1    | SL001998      | Tissue factor pathway inhibitor                                         | TFPI                   | P10646         | 7035                | TFPI                   | 1               |
| 3339-33_1    | SL007206      | Thrombospondin-2                                                        | TSP2                   | P35442         | 7058                | THBS2                  | 1               |
| 3340-53_1    | SL007207      | Thrombospondin-4                                                        | TSP4                   | P35443         | 7060                | THBS4                  | 1               |
| 3341-33_4    | SL006892      | Tyrosine-protein kinase ABL1                                            | ABL1                   | P00519         | 25                  | ABL1                   | 40              |
| 3343-1_4     | SL005574      | Aminoacylase-1                                                          | Aminoacylase-1         | Q03154         | 95                  | ACY1                   | 1               |
| 3344-60_4    | SL000272      | Antithrombin-III                                                        | Antithrombin III       | P01008         | 462                 | SERPINC1               | 0.005           |
| 3346-72_2    | SL010520      | Aurora kinase B                                                         | AURKB                  | Q96GD4         | 9212                | AURKB                  | 40              |
| 3347-9_2     | SL002792      | beta-adrenergic receptor kinase 1                                       | BARK1                  | P25098         | 156                 | ADRBK1                 | 40              |
| 3348-49_2    | SL003994      | Bone morphogenetic protein 1                                            | BMP-1                  | P13497         | 649                 | BMP1                   | 1               |
| 3350-53_2    | SL010491      | Calcium/calmodulin-dependent protein kinase type II subunit alpha       | CAMK2A                 | Q9UQM7         | 815                 | CAMK2A                 | 40              |
| 3351-1_1     | SL010492      | Calcium/calmodulin-dependent protein kinase type II subunit beta        | CAMK2B                 | Q13554         | 816                 | CAMK2B                 | 40              |
| 3352-80_3    | SL010288      | Carbonic anhydrase 6                                                    | Carbonic anhydrase 6   | P23280         | 765                 | CA6                    | 1               |
| 3356-50_1    | SL004868      | Carbonic anhydrase 7                                                    | Carbonic anhydrase VII | P43166         | 766                 | CA7                    | 40              |
| 3357-67_2    | SL010495      | Cyclin-dependent kinase 2:Cyclin-A2 complex                             | CDK2/cyclin A          | P24941 P20248  | 1017 890            | CDK2 CCNA2             | 40              |
| 3358-51_2    | SL010496      | Cyclin-dependent kinase 5:Cyclin-dependent kinase 5 activator 1 complex | CDK5/p35               | Q00535 Q15078  | 1020 8851           | CDK5 CDK5R1            | 40              |
| 3359-11_2    | SL010522      | Cyclin-dependent kinase 8:Cyclin-C complex                              | CDK8/cyclin C          | P49336 P24863  | 1024 892            | CDK8 CCNC              | 40              |
| 3360-50_4    | SL003726      | Serine/threonine-protein kinase Chk2                                    | Chk2                   | O96017         | 11200               | CHEK2                  | 40              |
| 3361-26_2    | SL010610      | C-type lectin domain family 4 member K                                  | CLC4K                  | Q9UJ71         | 50489               | CD207                  | 40              |
| 3362-61_2    | SL009400      | Chordin-like protein 1                                                  | CRDL1                  | Q9BU40         | 91851               | CHRD1                  | 1               |
| 3363-31_4    | SL004781      | Tyrosine-protein kinase CSK                                             | CSK                    | P41240         | 1445                | CSK                    | 1               |

Table S1

| SeqId     | Somald   | TargetFullName                                                                 | Target        | UniProt           | EntrezGeneID  | EntrezGeneSymbo | Dilution |
|-----------|----------|--------------------------------------------------------------------------------|---------------|-------------------|---------------|-----------------|----------|
| 3364-76_2 | SL006910 | Cathepsin L2                                                                   | Cathepsin V   | O60911            | 1515          | CTSV            | 40       |
| 3365-7_2  | SL010612 | Dickkopf-related protein 4                                                     | Dkk-4         | Q9UBT3            | 27121         | DKK4            | 1        |
| 3366-51_2 | SL006550 | Extracellular matrix protein 1                                                 | ECM1          | Q16610            | 1893          | ECM1            | 0.005    |
| 3367-8_3  | SL006777 | Fetuin-B                                                                       | FETUB         | Q9UGM5            | 26998         | FETUB           | 0.005    |
| 3373-5_2  | SL004654 | Granzyme H                                                                     | Granzyme H    | P20718            | 2999          | GZMH            | 40       |
| 3374-49_2 | SL010499 | Tyrosine-protein kinase HCK                                                    | HCK           | P08631            | 3055          | HCK             | 40       |
| 3376-49_2 | SL010613 | Interleukin-17 receptor D                                                      | IL-17 RD      | Q8NFM7            | 54756         | IL17RD          | 40       |
| 3378-49_2 | SL000064 | Kallikrein-7                                                                   | Kallikrein 7  | P49862            | 5650          | KLK7            | 0.005    |
| 3379-29_1 | SL007228 | Protein kinase C iota type                                                     | KPCI          | P41743            | 5584          | PRKCI           | 40       |
| 3381-24_2 | SL010500 | Tyrosine-protein kinase Lyn, isoform B                                         | LYNB          | P07948            | 4067          | LYN             | 1        |
| 3387-1_2  | SL010508 | Serine/threonine-protein kinase PAK 3                                          | PAK3          | O75914            | 5063          | PAK3            | 40       |
| 3388-58_2 | SL010510 | Serine/threonine-protein kinase PAK 7                                          | PAK7          | Q9P286            | 57144         | PAK7            | 40       |
| 3389-7_2  | SL000550 | Plasma serine protease inhibitor                                               | PCI           | P05154            | 5104          | SERPINA5        | 0.005    |
| 3390-72_2 | SL010512 | PIK3CA/PIK3R1                                                                  | PIK3CA/PIK3R1 | P42336 P27986     | 5290 5295     | PIK3CA PIK3R1   | 40       |
| 3391-10_2 | SL007250 | Phosphatidylinositol 4,5-bisphosphate 3-kinase catalytic subunit gamma isoform | PK3CG         | P48736            | 5294          | PIK3CG          | 1        |
| 3392-68_2 | SL017614 | RAC-alpha/beta/gamma serine/threonine-protein kinase                           | PKB a/b/g     | P31749 P31751 Q9Y | 207 208 10000 | AKT1 AKT2 AKT3  | 1        |
| 3394-81_2 | SL005258 | Serine/threonine-protein kinase PLK1                                           | PLK-1         | P53350            | 5347          | PLK1            | 40       |
| 3396-54_2 | SL000565 | Renin                                                                          | Renin         | P00797            | 5972          | REN             | 1        |
| 3397-7_4  | SL010616 | Tyrosine-protein phosphatase non-receptor type 11                              | SHP-2         | Q06124            | 5781          | PTPN11          | 40       |
| 3399-31_2 | SL007560 | Stabilin-2                                                                     | STAB2         | Q8WWQ8            | 55576         | STAB2           | 1        |
| 3400-49_2 | SL007747 | Serine/threonine-protein kinase TBK1                                           | TBK1          | Q9UHD2            | 29110         | TBK1            | 40       |
| 3401-8_2  | SL005261 | Tyrosine-protein phosphatase non-receptor type 2                               | TCPTP         | P17706            | 5771          | PTPN2           | 40       |
| 3403-1_2  | SL010617 | Tryptase beta-2                                                                | TPSB2         | P20231            | 64499         | TPSB2           | 1        |
| 3404-51_2 | SL010619 | Tryptase gamma                                                                 | TPSG1         | Q9NRR2            | 25823         | TPSG1           | 40       |
| 3405-6_2  | SL010529 | Ubiquitin-fold modifier-conjugating enzyme 1                                   | UFC1          | Q9Y3C8            | 51506         | UFC1            | 40       |
| 3412-7_1  | SL000104 | Apoptosis regulator Bcl-2                                                      | Bcl-2         | P10415            | 596           | BCL2            | 40       |
| 3413-50_2 | SL003703 | Bcl-2-related protein A1                                                       | BFL1          | Q16548            | 597           | BCL2A1          | 1        |

Table S1

| SeqId     | Somald   | TargetFullName                                                    | Target                  | UniProt       | EntrezGeneID | EntrezGeneSymbo | Dilution |
|-----------|----------|-------------------------------------------------------------------|-------------------------|---------------|--------------|-----------------|----------|
| 3414-40_2 | SL006374 | Cytoplasmic tyrosine-protein kinase BMX                           | BMX                     | P51813        | 660          | BMX             | 40       |
| 3415-61_2 | SL004660 | Bone sialoprotein 2                                               | BSP                     | P21815        | 3381         | IBSP            | 40       |
| 3416-2_2  | SL010521 | Tyrosine-protein kinase BTK                                       | BTK                     | Q06187        | 695          | BTK             | 1        |
| 3418-12_2 | SL010490 | Calcium/calmodulin-dependent protein kinase type 1D               | CAMK1D                  | Q8IU85        | 57118        | CAMK1D          | 1        |
| 3419-49_2 | SL010493 | Calcium/calmodulin-dependent protein kinase type II subunit delta | CAMK2D                  | Q13557        | 817          | CAMK2D          | 40       |
| 3420-21_2 | SL004869 | Carbonic anhydrase 13                                             | Carbonic anhydrase XIII | Q8N1Q1        | 377677       | CA13            | 40       |
| 3421-54_2 | SL004635 | Tumor necrosis factor ligand superfamily member 8                 | CD30 Ligand             | P32971        | 944          | TNFSF8          | 40       |
| 3422-4_2  | SL010494 | Cyclin-dependent kinase 1:G2/mitotic-specific cyclin-B1 complex   | CDK1/cyclin B           | P06493 P14635 | 983 891      | CDC2 CCNB1      | 40       |
| 3423-59_2 | SL005250 | Chymase                                                           | Chymase                 | P23946        | 1215         | CMA1            | 40       |
| 3427-63_2 | SL007324 | Casein kinase II subunit alpha                                    | CSK21                   | P68400        | 1457         | CSNK2A1         | 40       |
| 3431-54_2 | SL004137 | Ephrin type-A receptor 1                                          | EphA1                   | P21709        | 2041         | EPHA1           | 1        |
| 3432-21_2 | SL010498 | Ephrin type-A receptor 3                                          | EPHA3                   | P29320        | 2042         | EPHA3           | 40       |
| 3434-34_1 | SL010349 | Fibronectin Fragment 3                                            | FN1.3                   | P02751        | 2335         | FN1             | 0.005    |
| 3435-53_2 | SL010348 | Fibronectin Fragment 4                                            | FN1.4                   | P02751        | 2335         | FN1             | 0.005    |
| 3437-80_3 | SL004636 | Receptor-type tyrosine-protein kinase FLT3                        | Flt-3                   | P36888        | 2322         | FLT3            | 1        |
| 3438-10_2 | SL009324 | Follistatin-related protein 3                                     | FSTL3                   | O95633        | 10272        | FSTL3           | 1        |
| 3440-7_2  | SL004298 | Granzyme A                                                        | granzyme A              | P12544        | 3001         | GZMA            | 40       |
| 3441-64_2 | SL017188 | Glycogen synthase kinase-3 alpha/beta                             | GSK-3 alpha/beta        | P49840 P49841 | 2931 2932    | GSK3A GSK3B     | 40       |
| 3443-61_2 | SL010523 | Homeodomain-interacting protein kinase 3                          | HIPK3                   | Q9H422        | 10114        | HIPK3           | 40       |
| 3445-53_2 | SL004151 | Interleukin-15 receptor subunit alpha                             | IL-15 Ra                | Q13261        | 3601         | IL15RA          | 40       |
| 3446-7_2  | SL004152 | Interleukin-18 receptor 1                                         | IL-18 Ra                | Q13478        | 8809         | IL18R1          | 1        |
| 3447-64_2 | SL000039 | Interleukin-8                                                     | IL-8                    | P10145        | 3576         | CXCL8           | 40       |
| 3448-13_2 | SL004125 | Insulin receptor                                                  | IR                      | P06213        | 3643         | INSR            | 40       |
| 3449-58_2 | SL004876 | Kallistatin                                                       | Kallistatin             | P29622        | 5267         | SERPINA4        | 0.005    |
| 3450-4_2  | SL001797 | Kallikrein-6                                                      | Kallikrein 6            | Q92876        | 5653         | KLK6            | 1        |
| 3452-17_2 | SL006916 | Tyrosine-protein kinase Lck                                       | LCK                     | P06239        | 3932         | LCK             | 40       |

Table S1

| SeqId     | Somald   | TargetFullName                                        | Target                  | UniProt        | EntrezGeneID | EntrezGeneSymbo | Dilution |
|-----------|----------|-------------------------------------------------------|-------------------------|----------------|--------------|-----------------|----------|
| 3453-87_2 | SL006917 | Tyrosine-protein kinase Lyn                           | LYN                     | P07948         | 4067         | LYN             | 40       |
| 3457-57_1 | SL005084 | Periostin                                             | Periostin               | Q15063         | 10631        | POSTN           | 40       |
| 3459-49_2 | SL004155 | Platelet-derived growth factor receptor beta          | PDGF Rb                 | P09619         | 5159         | PDGFRB          | 40       |
| 3461-58_1 | SL009089 | Brevican core protein                                 | PGCB                    | Q96GW7         | 63827        | BCAN            | 40       |
| 3466-8_2  | SL010513 | cAMP-dependent protein kinase catalytic subunit alpha | PRKACA                  | P17612         | 5566         | PRKACA          | 40       |
| 3469-74_1 | SL010515 | Ribosomal protein S6 kinase alpha-3                   | RPS6KA3                 | P51812         | 6197         | RPS6KA3         | 40       |
| 3470-1_2  | SL001945 | E-selectin                                            | sE-Selectin             | P16581         | 6401         | SELE            | 1        |
| 3471-49_1 | SL010517 | Serine/threonine-protein kinase 16                    | STK16                   | O75716         | 8576         | STK16           | 1        |
| 3472-40_2 | SL000582 | Baculoviral IAP repeat-containing protein 5           | Survivin                | O15392         | 332          | BIRC5           | 40       |
| 3473-78_2 | SL005224 | Thrombopoietin Receptor                               | Thrombopoietin Receptor | P40238         | 4352         | MPL             | 40       |
| 3474-19_2 | SL002705 | Thrombospondin-1                                      | Thrombospondin-1        | P07996         | 7057         | THBS1           | 0.005    |
| 3477-63_2 | SL005225 | High affinity nerve growth factor receptor            | TrkA                    | P04629         | 4914         | NTRK1           | 40       |
| 3479-71_2 | SL006480 | Trypsin-3                                             | TRY3                    | P35030         | 5646         | PRSS3           | 40       |
| 3480-7_1  | SL008122 | Dual specificity protein phosphatase 3                | DUS3                    | P51452         | 1845         | DUSP3           | 40       |
| 3481-87_1 | SL011073 | Xaa-Pro aminopeptidase 1                              | XPNPEP1                 | Q9NQW7         | 7511         | XPNPEP1         | 40       |
| 3484-60_2 | SL000271 | Angiotensinogen                                       | Angiotensinogen         | P01019         | 183          | AGT             | 0.005    |
| 3485-28_2 | SL000283 | Beta-2-microglobulin                                  | b2-Microglobulin        | P61769         | 567          | B2M             | 0.005    |
| 3486-58_2 | SL000299 | Fibroblast growth factor 1                            | b-ECGF                  | P05230         | 2246         | FGF1            | 40       |
| 3487-32_2 | SL003167 | C-X-C motif chemokine 13                              | BLC                     | O43927         | 10563        | CXCL13          | 40       |
| 3488-64_2 | SL000342 | Catalase                                              | Catalase                | P04040         | 847          | CAT             | 1        |
| 3489-9_2  | SL004331 | Ciliary neurotrophic factor                           | CNTF                    | P26441         | 1270         | CNTF            | 40       |
| 3494-71_3 | SL004335 | Fibroblast growth factor 17                           | FGF-17                  | O60258         | 8822         | FGF17           | 40       |
| 3495-15_2 | SL003172 | C-X-C motif chemokine 6                               | GCP-2                   | P80162         | 6372         | CXCL6           | 40       |
| 3497-13_2 | SL002075 | Interferon alpha-2                                    | IFN-aA                  | P01563         | 3440         | IFNA2           | 40       |
| 3499-77_2 | SL004350 | Interleukin-17B                                       | IL-17B                  | Q9UHF5         | 27190        | IL17B           | 40       |
| 3503-4_2  | SL003179 | Integrin alpha-I: beta-1 complex                      | Integrin a1b1           | P56199, P05556 | 3672 3688    | ITGA1 ITGB1     | 1        |

Table S1

| SeqId     | Somald   | TargetFullName                      | Target                        | UniProt        | EntrezGeneID | EntrezGeneSymbo | Dilution |
|-----------|----------|-------------------------------------|-------------------------------|----------------|--------------|-----------------|----------|
| 3504-58_2 | SL004536 | Hepcidin                            | LEAP-1                        | P81172         | 57817        | HAMP            | 1        |
| 3505-6_2  | SL000507 | Lymphotoxin alpha1:beta2            | Lymphotoxin a1/b2             | P01374, Q06643 | 4049 4050    | LTA LTB         | 40       |
| 3506-49_1 | SL000508 | Lymphotoxin alpha2:beta1            | Lymphotoxin a2/b1             | P01374, Q06643 | 4049 4050    | LTA LTB         | 40       |
| 3508-78_3 | SL003187 | C-C motif chemokine 22              | MDC                           | O00626         | 6367         | CCL22           | 1        |
| 3509-1_1  | SL003190 | C-C motif chemokine 15              | MIP-5                         | Q16663         | 6359         | CCL15           | 1        |
| 3514-49_2 | SL004008 | Myeloblastin                        | Proteinase-3                  | P24158         | 5657         | PRTN3           | 1        |
| 3516-60_2 | SL004712 | Stromal cell-derived factor 1       | SDF-1                         | P48061         | 6387         | CXCL12          | 1        |
| 3518-54_2 | SL004015 | Carboxypeptidase B2                 | TAFI                          | Q96IY4         | 1361         | CPB2            | 0.005    |
| 3519-3_2  | SL003196 | C-C motif chemokine 17              | TARC                          | Q92583         | 6361         | CCL17           | 1        |
| 3520-58_1 | SL000089 | Transforming growth factor beta-3   | TGF-b3                        | P10600         | 7043         | TGFB3           | 40       |
| 3521-16_2 | SL000589 | Thyroid Stimulating Hormone         | TSH                           | P01215 P01222  | 1081 12372   | CGA TSHB        | 40       |
| 3522-57_1 | SL000615 | Vasoactive Intestinal Peptide       | Vasoactive Intestinal Peptide | P01282         | 7432         | VIP             | 40       |
| 3534-14_2 | SL003862 | CD40 ligand                         | CD40 ligand, soluble          | P29965         | 959          | CD40LG          | 40       |
| 3535-84_1 | SL004367 | Dickkopf-related protein 1          | DKK1                          | O94907         | 22943        | DKK1            | 1        |
| 3538-26_1 | SL009216 | Aromatic-L-amino-acid decarboxylase | dopa decarboxylase            | P20711         | 1644         | DDC             | 40       |
| 3554-24_1 | SL004258 | Adiponectin                         | Adiponectin                   | Q15848         | 9370         | ADIPOQ          | 0.005    |
| 3580-25_8 | SL000249 | Alpha-1-antitrypsin                 | a1-Antitrypsin                | P01009         | 5265         | SERPINA1        | 0.005    |
| 3581-53_3 | SL000251 | Alpha-2-HS-glycoprotein             | a2-HS-Glycoprotein            | P02765         | 197          | AHSG            | 0.005    |
| 3583-54_4 | SL005392 | Arylsulfatase A                     | Arylsulfatase A               | P15289         | 410          | ARSA            | 1        |
| 3585-54_4 | SL009341 | Basigin                             | BASI                          | P35613         | 682          | BSG             | 1        |



Table S1

| SeqId     | Somald   | TargetFullName                                      | Target                         | UniProt | EntrezGeneID | EntrezGeneSymbo | Dilution |
|-----------|----------|-----------------------------------------------------|--------------------------------|---------|--------------|-----------------|----------|
| 3587-53_2 | SL007056 | Bone morphogenetic protein 10                       | BMP10                          | O95393  | 27302        | BMP10           | 1        |
| 3591-51_3 | SL004865 | Cadherin-6                                          | Cadherin-6                     | P55285  | 1004         | CDH6            | 1        |
| 3592-4_3  | SL010489 | Calcium/calmodulin-dependent protein kinase type 1  | CAMK1                          | Q14012  | 8536         | CAMK1           | 1        |
| 3593-72_3 | SL003711 | Caspase-3                                           | Caspase-3                      | P42574  | 836          | CASP3           | 40       |
| 3594-6_5  | SL007121 | Cathepsin E                                         | CATE                           | P14091  | 1510         | CTSE            | 40       |
| 3600-2_3  | SL006029 | Chitotriosidase-1                                   | Chitotriosidase-1              | Q13231  | 1118         | CHIT1           | 1        |
| 3601-54_3 | SL008936 | Neural cell adhesion molecule L1-like protein       | CHL1                           | O00533  | 10752        | CHL1            | 1        |
| 3603-60_5 | SL007640 | C-type lectin domain family 7 member A              | CLC7A                          | Q9BXN2  | 64581        | CLEC7A          | 1        |
| 3605-77_4 | SL011049 | Mannan-binding lectin serine protease 1             | MASP3                          | P48740  | 5648         | MASP1           | 1        |
| 3606-2_5  | SL004120 | Discoidin domain-containing receptor 2              | Discoidin domain receptor 2    | Q16832  | 4921         | DDR2            | 1        |
| 3607-71_1 | SL009412 | Dickkopf-related protein 3                          | DKK3                           | Q9UBP4  | 27122        | DKK3            | 1        |
| 3608-12_5 | SL008916 | Dipeptidyl peptidase 2                              | DPP2                           | Q9UHL4  | 29952        | DPP7            | 1        |
| 3611-70_4 | SL004060 | Endothelin-converting enzyme 1                      | Endothelin-converting enzyme 1 | P42892  | 1889         | ECE1            | 1        |
| 3612-6_4  | SL004845 | Ephrin type-B receptor 4                            | EphB4                          | P54760  | 2050         | EPHB4           | 1        |
| 3613-62_5 | SL010462 | Ficolin-1                                           | FCN1                           | O00602  | 2219         | FCN1            | 1        |
| 3616-3_5  | SL008504 | N-acetylglucosamine-6-sulfatase                     | GNS                            | P15586  | 2799         | GNS             | 40       |
| 3617-80_4 | SL006512 | Hepatocyte growth factor activator                  | HGFA                           | Q04756  | 3083         | HGFAC           | 0.005    |
| 3620-67_2 | SL007806 | Interleukin-22 receptor subunit alpha-1             | IL22RA1                        | Q8N6P7  | 58985        | IL22RA1         | 40       |
| 3622-33_4 | SL008909 | Legumain                                            | LGMN                           | Q99538  | 5641         | LGMN            | 1        |
| 3623-84_4 | SL007059 | Lymphocyte antigen 86                               | LY86                           | O95711  | 9450         | LY86            | 1        |
| 3624-3_4  | SL011069 | Serine protease 27                                  | Marapsin                       | Q9BQR3  | 83886        | PRSS27          | 1        |
| 3627-71_4 | SL010376 | Membrane metallo-endopeptidase-like 1               | MMEL2                          | Q495T6  | 79258        | MMEL1           | 1        |
| 3628-3_4  | SL010501 | Dual specificity mitogen-activated protein kinase 2 | MP2K2                          | P36507  | 5605         | MAP2K2          | 1        |
| 3629-60_4 | SL006805 | Serine/threonine-protein kinase MRCK beta           | MRCKB                          | Q9Y5S2  | 9578         | CDC42BPB        | 1        |
| 3630-27_4 | SL004804 | Cell adhesion molecule 3                            | Nectin-like protein 1          | Q8N126  | 57863        | CADM3           | 1        |
| 3633-70_5 | SL008193 | Nidogen-2                                           | NID2                           | Q14112  | 22795        | NID2            | 1        |

Table S1

| SeqId     | Somald   | TargetFullName                                     | Target                        | UniProt       | EntrezGeneID | EntrezGeneSymbo | Dilution |
|-----------|----------|----------------------------------------------------|-------------------------------|---------------|--------------|-----------------|----------|
| 3634-5_4  | SL005491 | Opioid-binding protein/cell adhesion molecule      | OBCAM                         | Q14982        | 4978         | OPCML           | 1        |
| 3635-76_4 | SL010530 | OCIA domain-containing protein 1                   | OCAD1                         | Q9NX40        | 54940        | OCIAD1          | 1        |
| 3636-37_4 | SL007327 | Oxidized low-density lipoprotein receptor 1        | OLR1                          | P78380        | 4973         | OLR1            | 1        |
| 3640-14_3 | SL005263 | alpha-2-macroglobulin receptor-associated protein  | RAP                           | P30533        | 4043         | LRPAP1          | 1        |
| 3642-4_1  | SL008588 | SLAM family member 5                               | SLAF5                         | Q9UIB8        | 8832         | CD84            | 1        |
| 3643-90_2 | SL008760 | SLIT and NTRK-like protein 1                       | SLIK1                         | Q96PX8        | 114798       | SLITRK1         | 1        |
| 3644-5_4  | SL010381 | Dickkopf-like protein 1                            | Soggy-1                       | Q9UK85        | 27120        | DKKL1           | 1        |
| 3646-7_4  | SL010518 | Tyrosine-protein kinase Tec                        | TEC                           | P42680        | 7006         | TEC             | 1        |
| 3647-49_4 | SL018625 | Toll-like receptor 4:Lymphocyte antigen 96 complex | TLR4:MD-2 complex             | O00206 Q9Y6Y9 | 7099 23643   | TLR4 LY96       | 1        |
| 3651-50_5 | SL003201 | Vascular endothelial growth factor receptor 2      | VEGF sR2                      | P35968        | 3791         | KDR             | 1        |
| 3654-27_5 | SL007531 | BMP-binding endothelial regulator protein          | BMPER                         | Q8N8U9        | 168667       | BMPER           | 40       |
| 3656-9_1  | SL004864 | Cadherin-12                                        | Cadherin-12                   | P55289        | 1010         | CDH12           | 40       |
| 3657-74_3 | SL004720 | Calcineurin subunit B type 1                       | Calcineurin B a               | P63098        | 5534         | PPP3R1          | 1        |
| 3666-17_4 | SL006830 | Complement factor H-related protein 5              | complement factor H-related 5 | Q9BXR6        | 81494        | CFHR5           | 0.005    |
| 3676-15_3 | SL003679 | Cation-independent mannose-6-phosphate receptor    | IGF-II receptor               | P11717        | 3482         | IGF2R           | 1        |
| 3681-87_3 | SL003919 | Kallikrein-14                                      | kallikrein 14                 | Q9P0G3        | 43847        | KLK14           | 1        |
| 3684-78_3 | SL004580 | Macrophage scavenger receptor types I and II       | Macrophage scavenger receptor | P21757        | 4481         | MSR1            | 40       |
| 3685-53_1 | SL010466 | Membrane frizzled-related protein                  | MFRP                          | Q9BY79        | 83552        | MFRP            | 1        |
| 3707-12_2 | SL000254 | Serum albumin                                      | Albumin                       | P02768        | 213          | ALB             | 0.005    |
| 3708-62_1 | SL000252 | Alpha-2-macroglobulin                              | a2-Macroglobulin              | P01023        | 2            | A2M             | 1        |
| 3709-4_2  | SL000617 | Alanine aminotransferase 1                         | ALT                           | P24298        | 2875         | GPT             | 1        |

Table S1

| SeqId     | Somald   | TargetFullName                                                | Target                 | UniProt       | EntrezGeneID | EntrezGeneSymbo | Dilution |
|-----------|----------|---------------------------------------------------------------|------------------------|---------------|--------------|-----------------|----------|
| 3710-49_2 | SL000268 | Angiostatin                                                   | Angiostatin            | P00747        | 5340         | PLG             | 1        |
| 3714-49_2 | SL000382 | Creatine kinase M-type:Creatine kinase B-type heterodimer     | CK-MB                  | P12277 P06732 | 1152 1158    | CKB CKM         | 1        |
| 3719-2_2  | SL000076 | Cyclin-dependent kinase inhibitor 1B                          | p27Kip1                | P46527        | 1027         | CDKN1B          | 40       |
| 3723-1_2  | SL000306 | Brain natriuretic peptide 32                                  | BNP-32                 | P16860        | 4879         | NPPB            | 40       |
| 3727-35_1 | SL011509 | Peptide YY                                                    | PYY                    | P10082        | 5697         | PYY             | 40       |
| 3728-52_2 | SL000570 | Secretin                                                      | Secretin               | P09683        | 6343         | SCT             | 40       |
| 3730-81_2 | SL011448 | Tumor necrosis factor receptor superfamily member 4           | TNR4                   | P43489        | 7293         | TNFRSF4         | 40       |
| 3738-54_4 | SL002684 | Macrophage colony-stimulating factor 1                        | CSF-1                  | P09603        | 1435         | CSF1            | 40       |
| 3758-68_3 | SL003974 | Activated Protein C                                           | Activated Protein C    | P04070        | 5624         | PROC            | 1        |
| 3761-4_2  | SL000027 | Prostaglandin G/H synthase 2                                  | COX-2                  | P35354        | 5743         | PTGS2           | 40       |
| 3766-51_4 | SL004304 | Syntaxin-1A                                                   | STX1a                  | Q16623        | 6804         | STX1A           | 40       |
| 3773-15_4 | SL003200 | Angiotensin-1 receptor, soluble                               | sTie-2                 | Q02763        | 7010         | TEK             | 40       |
| 3795-6_2  | SL004642 | Disintegrin and metalloproteinase domain-containing protein 9 | ADAM 9                 | Q13443        | 8754         | ADAM9           | 40       |
| 3796-79_2 | SL007642 | Angiotensin-related protein 4                                 | ANGL4                  | Q9BY76        | 51129        | ANGPTL4         | 40       |
| 3797-1_1  | SL000638 | Cadherin-2                                                    | Cadherin-2             | P19022        | 1000         | CDH2            | 40       |
| 3798-71_1 | SL005508 | Carbonic anhydrase 9                                          | Carbonic anhydrase 9   | Q16790        | 768          | CA9             | 40       |
| 3799-11_2 | SL004867 | Carbonic anhydrase 3                                          | Carbonic anhydrase III | P07451        | 761          | CA3             | 1        |
| 3800-71_2 | SL000377 | Creatine kinase B-type                                        | CK-BB                  | P12277        | 1152         | CKB             | 40       |
| 3802-50_1 | SL007888 | Cystatin-S                                                    | Cystatin-S             | P01036        | 1472         | CST4            | 40       |
| 3803-10_2 | SL008382 | Cystatin-D                                                    | CYTD                   | P28325        | 1473         | CST5            | 40       |
| 3805-16_2 | SL010458 | Endothelial cell-specific molecule 1                          | Endocan                | Q9NQ30        | 11082        | ESM1            | 1        |
| 3806-55_1 | SL004844 | Ephrin type-A receptor 5                                      | EphA5                  | P54756        | 2044         | EPHA5           | 40       |
| 3807-1_2  | SL007651 | Fibroblast growth factor 23                                   | FGF23                  | Q9GZV9        | 8074         | FGF23           | 40       |
| 3808-76_2 | SL003990 | Fibroblast growth factor receptor 2                           | FGFR-2                 | P21802        | 2263         | FGFR2           | 40       |
| 3809-1_2  | SL004063 | Fibroblast growth factor receptor 3                           | FGFR-3                 | P22607        | 2261         | FGFR3           | 40       |
| 3810-50_2 | SL006912 | Tyrosine-protein kinase Fgr                                   | FGR                    | P09769        | 2268         | FGR             | 40       |

Table S1

| SeqId     | Somald   | TargetFullName                                                                                       | Target          | UniProt | EntrezGeneID | EntrezGeneSymbo | Dilution |
|-----------|----------|------------------------------------------------------------------------------------------------------|-----------------|---------|--------------|-----------------|----------|
| 3813-3_2  | SL006913 | Tyrosine-protein kinase Fyn                                                                          | FYN             | P06241  | 2534         | FYN             | 40       |
| 3815-14_1 | SL007620 | Interleukin-12 receptor subunit beta-2                                                               | IL-12 RB2       | Q99665  | 3595         | IL12RB2         | 40       |
| 3817-18_1 | SL007358 | Protein kinase C theta type                                                                          | KPCT            | Q04759  | 5588         | PRKCQ           | 40       |
| 3820-68_2 | SL010503 | MAP kinase-activated protein kinase 2                                                                | MAPK2           | P49137  | 9261         | MAPKAPK2        | 40       |
| 3821-28_1 | SL010504 | MAP kinase-activated protein kinase 5                                                                | MAPK5           | Q8IW41  | 8550         | MAPKAPK5        | 40       |
| 3822-54_2 | SL004765 | MAP kinase-activated protein kinase 3                                                                | MAPKAPK3        | Q16644  | 7867         | MAPKAPK3        | 1        |
| 3823-9_1  | SL010505 | Megakaryocyte-associated tyrosine-protein kinase                                                     | MATK            | P42679  | 4145         | MATK            | 40       |
| 3825-18_2 | SL010502 | Mitogen-activated protein kinase 8                                                                   | MK08            | P45983  | 5599         | MAPK8           | 40       |
| 3827-22_1 | SL010509 | Serine/threonine-protein kinase PAK 6                                                                | PAK6            | Q9NQU5  | 56924        | PAK6            | 40       |
| 3828-54_2 | SL011071 | Platelet-derived growth factor C                                                                     | PDGF-CC         | Q9NRA1  | 56034        | PDGFC           | 40       |
| 3831-21_1 | SL003761 | Phosphatidylinositol 3,4,5-trisphosphate 3-phosphatase and dual-specificity protein phosphatase PTEN | pTEN            | P60484  | 5728         | PTEN            | 40       |
| 3832-51_1 | SL010514 | Protein-tyrosine kinase 6                                                                            | PTK6            | Q13882  | 5753         | PTK6            | 40       |
| 3835-11_2 | SL004492 | Toll-like receptor 2                                                                                 | TLR2            | O60603  | 7097         | TLR2            | 40       |
| 3836-51_2 | SL010528 | Ubiquitin-fold modifier 1                                                                            | UFM1            | P61960  | 51569        | UFM1            | 40       |
| 3839-60_2 | SL011629 | AH receptor-interacting protein                                                                      | AIP             | O00170  | 9049         | AIP             | 40       |
| 3844-2_1  | SL004823 | Peptidyl-prolyl cis-trans isomerase A                                                                | Cyclophilin A   | P62937  | 5478         | PPIA            | 1        |
| 3845-51_2 | SL011530 | Dynein light chain roadblock-type 1                                                                  | DLRB1           | Q9NP97  | 83658        | DYNLRB1         | 40       |
| 3847-56_2 | SL011532 | Persulfide dioxygenase ETHE1, mitochondrial                                                          | ETHE1           | O95571  | 23474        | ETHE1           | 1        |
| 3848-14_2 | SL003785 | Glyceraldehyde-3-phosphate dehydrogenase                                                             | GAPDH, liver    | P04406  | 2597         | GAPDH           | 1        |
| 3852-19_2 | SL000449 | DnaJ homolog subfamily B member 1                                                                    | HSP 40          | P25685  | 3337         | DNAJB1          | 40       |
| 3853-56_1 | SL008102 | Malate dehydrogenase, cytoplasmic                                                                    | MDHC            | P40925  | 4190         | MDH1            | 1        |
| 3854-24_1 | SL011631 | Nascent polypeptide-associated complex subunit alpha                                                 | NACA            | Q13765  | 4666         | NACA            | 40       |
| 3855-56_1 | SL004919 | Peroxiredoxin-1                                                                                      | Peroxiredoxin-1 | Q06830  | 5052         | PRDX1           | 1        |
| 3858-5_1  | SL008063 | Low molecular weight phosphotyrosine protein phosphatase                                             | PPAC            | P24666  | 52           | ACP1            | 40       |
| 3859-50_2 | SL010973 | Proteasome subunit alpha type-1                                                                      | PSA1            | P25786  | 5682         | PSMA1           | 40       |
| 3860-7_2  | SL005630 | Proteasome subunit alpha type-6                                                                      | PSA6            | P60900  | 5687         | PSMA6           | 40       |

Table S1

| SeqId     | Somald   | TargetFullName                                                         | Target                    | UniProt | EntrezGeneID | EntrezGeneSymbo | Dilution |
|-----------|----------|------------------------------------------------------------------------|---------------------------|---------|--------------|-----------------|----------|
| 3864-5_2  | SL011528 | 40S ribosomal protein S7                                               | RS7                       | P62081  | 6201         | RPS7            | 40       |
| 3865-53_1 | SL006919 | Ribosomal protein S6 kinase alpha-5                                    | RSK-like protein kinase   | O75582  | 9252         | RPS6KA5         | 40       |
| 3866-7_2  | SL011529 | Ribosome maturation protein SBDS                                       | SBDS                      | Q9Y3A5  | 51119        | SBDS            | 40       |
| 3867-49_1 | SL011630 | Seizure 6-like protein 2                                               | SE6L2                     | Q6UXD5  | 26470        | SEZ6L2          | 40       |
| 3868-8_1  | SL011533 | Small glutamine-rich tetratricopeptide repeat-containing protein alpha | SGTA                      | O43765  | 6449         | SGTA            | 40       |
| 3872-2_1  | SL005679 | Translationally-controlled tumor protein                               | TCTP                      | P13693  | 7178         | TPT1            | 1        |
| 3873-51_2 | SL000588 | Thyroid peroxidase                                                     | TMA                       | P07202  | 7173         | TPO             | 40       |
| 3874-8_1  | SL008157 | Ubiquitin-conjugating enzyme E2 L3                                     | UB2L3                     | P68036  | 7332         | UBE2L3          | 40       |
| 3875-62_1 | SL011549 | AT-rich interactive domain-containing protein 3                        | AARI3A                    | Q99856  | 1820         | ARID3A          | 40       |
| 3877-67_2 | SL004938 | Calcium/calmodulin-dependent protein kinase kinase 1                   | CaMKK alpha               | Q8N5S9  | 84254        | CAMKK1          | 1        |
| 3879-50_1 | SL011232 | Hsp90 co-chaperone Cdc37                                               | CDC37                     | Q16543  | 11140        | CDC37           | 40       |
| 3881-49_2 | SL003753 | Dynein light chain 1, cytoplasmic                                      | DLC8                      | P63167  | 8655         | DYNLL1          | 40       |
| 3887-90_2 | SL010927 | Importin subunit beta-1                                                | IMB1                      | Q14974  | 3837         | KPNB1           | 40       |
| 3888-8_1  | SL009628 | Inhibitor of growth protein 1                                          | ING1                      | Q9UK53  | 3621         | ING1            | 1        |
| 3889-64_2 | SL006132 | Lamin-B1                                                               | Lamin-B1                  | P20700  | 4001         | LMNB1           | 40       |
| 3890-8_2  | SL000493 | L-lactate dehydrogenase B chain                                        | LDH-H 1                   | P07195  | 3945         | LDHB            | 0.005    |
| 3891-56_1 | SL009629 | Methyl-CpG-binding domain protein 4                                    | MBD4                      | O95243  | 8930         | MBD4            | 40       |
| 3893-64_1 | SL001905 | Mesothelin                                                             | Mesothelin                | Q13421  | 10232        | MSLN            | 40       |
| 3894-15_2 | SL005629 | N-acetyl-D-glucosamine kinase                                          | NAGK                      | Q9UJ70  | 55577        | NAGK            | 1        |
| 3896-5_2  | SL004820 | Phosphoglycerate mutase 1                                              | Phosphoglycerate mutase 1 | P18669  | 5223         | PGAM1           | 40       |
| 3897-61_1 | SL011709 | Pyridoxal phosphate phosphatase                                        | PLPP                      | Q96GD0  | 57026        | PDXP            | 40       |
| 3898-5_2  | SL007266 | 26S proteasome non-ATPase regulatory subunit 7                         | PSD7                      | P51665  | 5713         | PSMD7           | 40       |
| 3902-21_2 | SL008808 | S-phase kinase-associated protein 1                                    | SKP1                      | P63208  | 6500         | SKP1            | 1        |
| 3903-49_2 | SL005372 | Sorting nexin-4                                                        | Sorting nexin 4           | O95219  | 8723         | SNX4            | 40       |
| 3905-62_1 | SL008143 | Ubiquitin-conjugating enzyme E2 N                                      | UBE2N                     | P61088  | 7334         | UBE2N           | 1        |

Table S1

| SeqId     | Somald   | TargetFullName                                                | Target                      | UniProt | EntrezGeneID    | EntrezGeneSymbo | Dilution |
|-----------|----------|---------------------------------------------------------------|-----------------------------|---------|-----------------|-----------------|----------|
| 4122-12_2 | SL004119 | Epithelial discoidin domain-containing receptor               | discoidin domain receptor 1 | Q08345  | 780             | DDR1            | 40       |
| 4123-60_2 | SL003171 | Fibroblast growth factor 4                                    | FGF-4                       | P08620  | 2249            | FGF4            | 40       |
| 4124-24_2 | SL000451 | Heat shock 70 kDa protein 1A                                  | HSP 70                      | P0DMV8  | 3303            | HSPA1A          | 40       |
| 4125-52_2 | SL003680 | Advanced glycosylation end product-specific receptor, soluble | sRAGE                       | Q15109  | 177             | AGER            | 1        |
| 4126-22_1 | SL004511 | Bactericidal permeability-increasing protein                  | BPI                         | P17213  | 671             | BPI             | 1        |
| 4127-75_1 | SL000322 | Complement component C6                                       | C6                          | P13671  | 729             | C6              | 0.005    |
| 4128-27_2 | SL003104 | C-C motif chemokine 24                                        | Eotaxin-2                   | O00175  | 6369            | CCL24           | 40       |
| 4129-72_1 | SL000414 | Complement factor B                                           | Factor B                    | P00751  | 629             | CFB             | 0.005    |
| 4130-71_1 | SL004340 | Fibroblast growth factor 6                                    | FGF-6                       | P10767  | 2251            | FGF6            | 40       |
| 4131-72_2 | SL000426 | Fibronectin                                                   | Fibronectin                 | P02751  | 2335            | FN1             | 0.005    |
| 4132-27_2 | SL000674 | Follistatin                                                   | FST                         | P19883  | 10468           | FST             | 40       |
| 4133-54_2 | SL004068 | Granzyme B                                                    | Granzyme B                  | P10144  | 3002            | GZMB            | 40       |
| 4134-4_2  | SL000138 | Heparin-binding EGF-like growth factor                        | HB-EGF                      | Q99075  | 1839            | HBEGF           | 40       |
| 4135-84_2 | SL000461 | Immunoglobulin E                                              | IgE                         | P01854  | 3497 50802 3535 | IGHE IGK@ IGL@  | 1        |
| 4136-40_2 | SL004353 | Interleukin-17D                                               | IL-17D                      | Q8TAD2  | 53342           | IL17D           | 40       |
| 4137-57_2 | SL004351 | Interleukin-25                                                | IL-17E                      | Q9H293  | 64806           | IL25            | 40       |
| 4138-25_2 | SL004346 | Interleukin-20                                                | IL-20                       | Q9NYY1  | 50604           | IL20            | 40       |
| 4139-71_2 | SL001943 | Interleukin-6 receptor subunit alpha                          | IL-6 sRa                    | P08887  | 3570            | IL6R            | 1        |
| 4140-3_2  | SL000483 | Interleukin-7                                                 | IL-7                        | P13232  | 3574            | IL7             | 40       |
| 4141-79_1 | SL003183 | C-X-C motif chemokine 10                                      | IP-10                       | P02778  | 3627            | CXCL10          | 40       |
| 4143-74_2 | SL003186 | Lymphotactin                                                  | Lymphotactin                | P47992  | 6375            | XCL1            | 40       |
| 4144-13_1 | SL000517 | C-C motif chemokine 13                                        | MCP-4                       | Q99616  | 6357            | CCL13           | 40       |
| 4145-58_2 | SL004359 | Neurotrophin-3                                                | Neurotrophin-3              | P20783  | 4908            | NTF3            | 40       |
| 4146-58_2 | SL004360 | Neurotrophin-4                                                | Neurotrophin-5              | P34130  | 4909            | NTF4            | 40       |
| 4148-49_2 | SL002755 | Pappalysin-1                                                  | PAPP-A                      | Q13219  | 5069            | PAPPA           | 1        |
| 4149-8_2  | SL000537 | Platelet-derived growth factor subunit B                      | PDGF-BB                     | P01127  | 5155            | PDGFB           | 1        |
| 4150-75_2 | SL000540 | Plasmin                                                       | Plasmin                     | P00747  | 5340            | PLG             | 40       |

Table S1

| <u>SeqId</u> | <u>Somald</u> | <u>TargetFullName</u>                                         | <u>Target</u>                    | <u>UniProt</u>     | <u>EntrezGeneID</u> | <u>EntrezGeneSymbol</u> | <u>Dilution</u> |
|--------------|---------------|---------------------------------------------------------------|----------------------------------|--------------------|---------------------|-------------------------|-----------------|
| 4151-6_2     | SL000541      | Plasminogen                                                   | Plasminogen                      | P00747             | 5340                | PLG                     | 0.005           |
| 4152-58_2    | SL000545      | Plasma kallikrein                                             | Prekallikrein                    | P03952             | 3818                | KLKB1                   | 0.005           |
| 4153-11_2    | SL018548      | Alpha-1-antichymotrypsin complex                              | alpha-1-antichymotrypsin complex | P01011             | 12                  | SERPINA3                | 0.005           |
| 4154-57_2    | SL000560      | P-selectin                                                    | P-Selectin                       | P16109             | 6403                | SELP                    | 1               |
| 4155-3_2     | SL003198      | Tenascin                                                      | Tenascin                         | P24821             | 3371                | TNC                     | 1               |
| 4156-74_1    | SL000088      | Transforming growth factor beta-2                             | TGF-b2                           | P61812             | 7042                | TGFB2                   | 40              |
| 4157-2_1     | SL000586      | Thrombin                                                      | Thrombin                         | P00734             | 2147                | F2                      | 1               |
| 4158-54_2    | SL000613      | Urokinase-type plasminogen activator                          | uPA                              | P00749             | 5328                | PLAU                    | 40              |
| 4159-130_1   | SL000415      | Complement factor H                                           | Factor H                         | P08603             | 3075                | CFH                     | 0.005           |
| 4160-49_1    | SL000124      | 72 kDa type IV collagenase                                    | MMP-2                            | P08253             | 4313                | MMP2                    | 1               |
| 4162-54_2    | SL000601      | Serotransferrin                                               | Transferrin                      | P02787             | 7018                | TF                      | 0.005           |
| 4163-5_2     | SL002093      | Histone H2A.z                                                 | Histone H2A.z                    | P0C055             | 3015                | H2AFZ                   | 40              |
| 4165-2_1     | SL000587      | Thyroglobulin                                                 | Thyroglobulin                    | P01266             | 7038                | TG                      | 40              |
| 4179-57_3    | SL017611      | 14-3-3 protein family                                         | 14-3-3                           | P31946, P62258, P6 | 7529, 7531, 7532,   | YWHAB, YWHAE, YW        | 1               |
| 4184-43_3    | SL008378      | Eukaryotic translation initiation factor 4E-binding protein 2 | 4EBP2                            | Q13542             | 1979                | EIF4EBP2                | 40              |
| 4187-49_2    | SL000247      | 6-phosphogluconate dehydrogenase, decarboxylating             | 6-Phosphogluconate dehydrogenase | P52209             | 5226                | PGD                     | 1               |
| 4188-1_2     | SL003658      | Aflatoxin B1 aldehyde reductase member 2                      | Aflatoxin B1 aldehyde reductase  | O43488             | 8574                | AKR7A2                  | 40              |
| 4192-10_2    | SL008039      | Alcohol dehydrogenase [NADP(+)]                               | AK1A1                            | P14550             | 10327               | AKR1A1                  | 1               |

Table S1

| <u>SeqId</u> | <u>Somald</u> | <u>TargetFullName</u>                                         | <u>Target</u>             | <u>UniProt</u> | <u>EntrezGeneID</u> | <u>EntrezGeneSymbo</u> | <u>Dilution</u> |
|--------------|---------------|---------------------------------------------------------------|---------------------------|----------------|---------------------|------------------------|-----------------|
| 4194-26_3    | SL011769      | Acidic leucine-rich nuclear phosphoprotein 32 family member B | AN32B                     | Q92688         | 10541               | ANP32B                 | 1               |
| 4203-50_2    | SL004920      | Cofilin-1                                                     | Cofilin-1                 | P23528         | 1072                | CFL1                   | 1               |
| 4209-60_2    | SL004757      | Vacuolar protein sorting-associated protein VTA homolog       | DRG-1                     | Q9NP79         | 51534               | VTA1                   | 1               |
| 4212-5_3     | SL012188      | Epidermal growth factor receptor substrate 15-like 1          | EP15R                     | Q9UBC2         | 58513               | EPS15L1                | 40              |
| 4217-49_3    | SL004795      | 3-hydroxyacyl-CoA dehydrogenase type-2                        | ERAB                      | Q99714         | 3028                | HSD17B10               | 40              |
| 4220-39_2    | SL005588      | Tyrosine-protein kinase Fer                                   | FER                       | P16591         | 2241                | FER                    | 40              |
| 4224-7_2     | SL007022      | Heterogeneous nuclear ribonucleoprotein Q                     | HNRPQ                     | O60506         | 10492               | SYNCRIP                | 40              |
| 4230-1_2     | SL011211      | Eukaryotic translation initiation factor 4 gamma 2            | IF4G2                     | P78344         | 1982                | EIF4G2                 | 40              |
| 4232-19_2    | SL003304      | Insulin-like growth factor 1 receptor                         | IGF-I sR                  | P08069         | 3480                | IGF1R                  | 40              |
| 4234-8_2     | SL004146      | Interleukin-1 receptor-like 1                                 | IL-1 R4                   | Q01638         | 9173                | IL1RL1                 | 1               |
| 4237-70_3    | SL011770      | Leucine carboxyl methyltransferase 1                          | LCMT1                     | Q9UIC8         | 51451               | LCMT1                  | 40              |
| 4238-4_2     | SL012168      | Protein lin-7 homolog B                                       | LIN7B                     | Q9HAP6         | 64130               | LIN7B                  | 40              |
| 4240-31_2    | SL002650      | Pyruvate kinase PKM                                           | M2-PK                     | P14618         | 5315                | PKM2                   | 1               |
| 4245-80_2    | SL001999      | E3 ubiquitin-protein ligase Mdm2                              | MDM2                      | Q00987         | 4193                | MDM2                   | 40              |
| 4246-40_2    | SL004154      | Neural cell adhesion molecule L1                              | NCAM-L1                   | P32004         | 3897                | L1CAM                  | 1               |
| 4249-64_2    | SL004921      | Nucleoside diphosphate kinase B                               | NDP kinase B              | P22392         | 4831                | NME2                   | 40              |
| 4250-23_3    | SL006268      | NSFL1 cofactor p47                                            | NSF1C                     | Q9UNZ2         | 55968               | NSFL1C                 | 40              |
| 4254-6_2     | SL011768      | NudC domain-containing protein 3                              | NUDC3                     | Q8IVD9         | 23386               | NUDCD3                 | 40              |
| 4258-15_2    | SL008331      | Proliferation-associated protein 2G4                          | PA2G4                     | Q9UQ80         | 5036                | PA2G4                  | 1               |
| 4261-55_2    | SL005493      | Serum paraoxonase/arylesterase 1                              | paraoxonase 1             | P27169         | 5444                | PON1                   | 40              |
| 4267-81_3    | SL011772      | Pescadillo homolog                                            | PESC                      | O00541         | 23481               | PES1                   | 40              |
| 4271-75_2    | SL006705      | Prefoldin subunit 5                                           | PFD5                      | Q99471         | 5204                | PFDN5                  | 40              |
| 4272-46_2    | SL000539      | Glucose-6-phosphate isomerase                                 | PHI                       | P06744         | 2821                | GPI                    | 1               |
| 4276-10_2    | SL005358      | Phosphatidylethanolamine-binding protein 1                    | prostatic binding protein | P30086         | 5037                | PEBP1                  | 1               |



Table S1

| <u>SeqId</u> | <u>Somald</u> | <u>TargetFullName</u>                                      | <u>Target</u>                            | <u>UniProt</u> | <u>EntrezGeneID</u> | <u>EntrezGeneSymbo</u> | <u>Dilution</u> |
|--------------|---------------|------------------------------------------------------------|------------------------------------------|----------------|---------------------|------------------------|-----------------|
| 4278-14_3    | SL004901      | Protein disulfide-isomerase                                | Protein disulfide-isomerase              | P07237         | 5034                | P4HB                   | 40              |
| 4280-47_2    | SL008865      | Proteasome subunit alpha type-2                            | PSA2                                     | P25787         | 5683                | PSMA2                  | 40              |
| 4282-3_2     | SL005034      | GTP-binding nuclear protein Ran                            | RAN                                      | P62826         | 5901                | RAN                    | 1               |
| 4284-18_3    | SL011535      | RNA-binding protein 39                                     | RBM39                                    | Q14498         | 9584                | RBM39                  | 40              |
| 4292-5_3     | SL011202      | Alpha-soluble NSF attachment protein                       | SNAA                                     | P54920         | 8775                | NAPA                   | 1               |
| 4294-16_2    | SL006088      | Sphingosine kinase 1                                       | Sphingosine kinase 1                     | Q9NYA1         | 8877                | SPHK1                  | 40              |
| 4297-62_3    | SL005115      | Spondin-1                                                  | Spondin-1                                | Q9HCB6         | 10418               | SPON1                  | 1               |
| 4301-58_2    | SL000057      | Thymidine kinase, cytosolic                                | Thymidine kinase                         | P04183         | 7083                | TK1                    | 40              |
| 4304-18_2    | SL006698      | Ligand-dependent nuclear receptor corepressor like protein | transcription factor MLR1, isoform CRA_b | Q8N3X6         | 254251              | LCORL                  | 40              |
| 4306-4_2     | SL003655      | Transketolase                                              | Transketolase                            | P29401         | 7086                | TKT                    | 1               |
| 4309-59_3    | SL004812      | Triosephosphate isomerase                                  | Triosephosphate isomerase                | P60174         | 7167                | TPI1                   | 1               |
| 4314-12_2    | SL011809      | dCTP pyrophosphatase 1                                     | XTP3A                                    | Q9H773         | 79077               | DCTPP1                 | 1               |
| 4318-12_3    | SL004940      | Tyrosine-protein phosphatase non-receptor type 6           | PTP-1C                                   | P29350         | 5777                | PTPN6                  | 40              |
| 4322-28_3    | SL013489      | Protein amnionless                                         | AMNLS                                    | Q9BXJ7         | 81693               | AMN                    | 40              |
| 4324-33_2    | SL008516      | Cystatin-SA                                                | CYTT                                     | P09228         | 1470                | CST2                   | 40              |
| 4328-2_2     | SL013490      | Brother of CDO                                             | BOC                                      | Q9BWV1         | 91653               | BOC                    | 40              |
| 4332-6_2     | SL013488      | C-type lectin domain family 1 member B                     | CLC1B                                    | Q9P126         | 51266               | CLEC1B                 | 1               |
| 4336-2_1     | SL000572      | Serum amyloid A-1 protein                                  | SAA                                      | P0DJ18         | 6288                | SAA1                   | 1               |
| 4337-49_2    | SL000051      | C-reactive protein                                         | CRP                                      | P02741         | 1401                | CRP                    | 1               |
| 4342-10_3    | SL002922      | Intercellular adhesion molecule 1                          | sICAM-1                                  | P05362         | 3383                | ICAM1                  | 1               |
| 4355-13_1    | SL007752      | Death-associated protein kinase 2                          | DAPK2                                    | Q9UIK4         | 23604               | DAPK2                  | 1               |

Table S1

| SeqId     | Somald   | TargetFullName                                                   | Target                 | UniProt | EntrezGeneID | EntrezGeneSymbo | Dilution |
|-----------|----------|------------------------------------------------------------------|------------------------|---------|--------------|-----------------|----------|
| 4359-87_1 | SL013570 | Dual specificity tyrosine-phosphorylation-regulated kinase 3     | DYRK3                  | O43781  | 8444         | DYRK3           | 1        |
| 4374-45_2 | SL003869 | Growth/differentiation factor 15                                 | MIC-1                  | Q99988  | 9518         | GDF15           | 1        |
| 4389-2_1  | SL007003 | Desert hedgehog protein N-product                                | DHH                    | O43323  | 50846        | DHH             | 40       |
| 4392-54_2 | SL005161 | Fibroblast growth factor 12                                      | FGF-12                 | P61328  | 2257         | FGF12           | 40       |
| 4393-3_1  | SL004334 | Fibroblast growth factor 16                                      | FGF-16                 | O43320  | 8823         | FGF16           | 40       |
| 4394-71_2 | SL014308 | Fibroblast growth factor 8 isoform A                             | FGF-8A                 | P55075  | 2253         | FGF8            | 40       |
| 4396-54_1 | SL004348 | Interferon lambda-1                                              | IFN-lambda<br>1        | Q8IU54  | 282618       | IFNL1           | 40       |
| 4397-26_2 | SL004349 | Interferon lambda-2                                              | IFN-lambda<br>2        | Q8IZJ0  | 282616       | IFNL2           | 40       |
| 4407-10_1 | SL005202 | Hepatocyte growth factor-like protein                            | MSP                    | P26927  | 4485         | MST1            | 0.005    |
| 4413-3_2  | SL001888 | Antileukoproteinase                                              | SLPI                   | P03973  | 6590         | SLPI            | 1        |
| 4414-69_2 | SL004484 | Pulmonary surfactant-associated protein D                        | SP-D                   | P35247  | 6441         | SFTPD           | 1        |
| 4420-7_2  | SL009988 | Disintegrin and metalloproteinase domain-containing protein 12   | ADAM12                 | O43184  | 8038         | ADAM12          | 40       |
| 4423-77_2 | SL003674 | Bcl-2-like protein 1                                             | BCL2-like 1<br>protein | Q07817  | 598          | BCL2L1          | 40       |
| 4428-1_2  | SL013988 | Carbohydrate sulfotransferase 2                                  | CHST2                  | Q9Y4C5  | 9435         | CHST2           | 40       |
| 4429-51_2 | SL014130 | Carbohydrate sulfotransferase 6                                  | CHST6                  | Q9GZX3  | 4166         | CHST6           | 40       |
| 4430-44_3 | SL006713 | Collectin-11                                                     | Collectin<br>Kidney 1  | Q9BWP8  | 78989        | COLEC11         | 1        |
| 4435-66_2 | SL009045 | Ectonucleotide pyrophosphatase/phosphodiesterase family member 7 | ENPP7                  | Q6UWV6  | 339221       | ENPP7           | 40       |
| 4436-1_2  | SL014093 | Ectonucleoside triphosphate diphosphohydrolase 3                 | ENTP3                  | O75355  | 956          | ENTPD3          | 40       |
| 4437-56_3 | SL014028 | Ectonucleoside triphosphate diphosphohydrolase 5                 | ENTP5                  | O75356  | 957          | ENTPD5          | 1        |
| 4440-15_2 | SL014088 | Fc receptor-like protein 3                                       | FCRL3                  | Q96P31  | 115352       | FCRL3           | 40       |
| 4449-67_3 | SL007024 | Gremlin-1                                                        | GREM1                  | O60565  | 26585        | GREM1           | 40       |
| 4450-26_2 | SL009791 | Heterogeneous nuclear ribonucleoprotein A/B                      | hnRNP A/B              | Q99729  | 3182         | HNRNPAB         | 1        |
| 4452-9_2  | SL014096 | Leucine-rich repeat transmembrane neuronal protein 1             | LRRT1                  | Q86UE6  | 347730       | LRRTM1          | 40       |

Table S1

| SeqId     | Somald   | TargetFullName                                       | Target                | UniProt        | EntrezGeneID | EntrezGeneSymbo | Dilution |
|-----------|----------|------------------------------------------------------|-----------------------|----------------|--------------|-----------------|----------|
| 4453-83_3 | SL014108 | Leucine-rich repeat transmembrane neuronal protein 3 | LRRT3                 | Q86VH5         | 347731       | LRRTM3          | 40       |
| 4455-89_2 | SL006523 | Lactadherin                                          | MFGM                  | Q08431         | 4240         | MFGE8           | 40       |
| 4459-68_2 | SL014069 | Proprotein convertase subtilisin/kexin type 7        | PCSK7                 | Q16549         | 9159         | PCSK7           | 40       |
| 4460-8_2  | SL006998 | 3-phosphoinositide-dependent protein kinase 1        | PDPK1                 | O15530         | 5170         | PDPK1           | 40       |
| 4464-10_2 | SL001753 | Sialoadhesin                                         | Sialoadhesin          | Q9BZZ2         | 6614         | SIGLEC1         | 40       |
| 4467-49_2 | SL005488 | SPARC-like protein 1                                 | SPARCL1               | Q14515         | 8404         | SPARCL1         | 1        |
| 4468-21_2 | SL014029 | Sphingosine kinase 2                                 | SPHK2                 | Q9NRA0         | 56848        | SPHK2           | 40       |
| 4469-78_2 | SL007502 | Carbohydrate sulfotransferase 15                     | ST4S6                 | Q7LFX5         | 51363        | CHST15          | 1        |
| 4471-50_2 | SL008945 | Protein-glutamine gamma-glutamyltransferase E        | TGM3                  | Q08188         | 7053         | TGM3            | 40       |
| 4472-5_2  | SL004908 | Tropomyosin beta chain                               | Tropomyosin 2         | P07951         | 7169         | TPM2            | 40       |
| 4474-19_2 | SL004070 | Ubiquitin                                            | Ubiquitin             | P62979         | 6233         | RPS27A          | 1        |
| 4476-22_2 | SL010519 | Tyrosine-protein kinase ZAP-70                       | ZAP70                 | P43403         | 7535         | ZAP70           | 1        |
| 4479-14_2 | SL000308 | Plasma protease C1 inhibitor                         | C1-Esterase Inhibitor | P05155         | 710          | SERPING1        | 1        |
| 4480-59_2 | SL000314 | Complement C3b                                       | C3b                   | P01024         | 718          | C3              | 40       |
| 4481-34_2 | SL000316 | Complement C4                                        | C4                    | P0C0L4, P0C0L5 | 720 721      | C4A C4B         | 0.005    |
| 4482-66_2 | SL000321 | Complement C5b-C6 complex                            | C5b, 6 Complex        | P01031,P13671  | 727 729      | C5 C6           | 0.005    |
| 4487-1_1  | SL001691 | Fibroblast growth factor 7                           | FGF7                  | P21781         | 2252         | FGF7            | 40       |
| 4490-65_2 | SL005187 | Interleukin-3 receptor subunit alpha                 | IL-3 Ra               | P26951         | 3563         | IL3RA           | 40       |
| 4491-4_2  | SL005188 | Interleukin-5 receptor subunit alpha                 | IL-5 Ra               | Q01344         | 3568         | IL5RA           | 40       |
| 4493-92_1 | SL000470 | Interleukin-11                                       | IL-11                 | P20809         | 3589         | IL11            | 40       |
| 4495-33_2 | SL017189 | Kininogen-1                                          | Kininogen, HMW        | P01042         | 3827         | KNG1            | 0.005    |
| 4496-60_2 | SL000522 | Macrophage metalloelastase                           | MMP-12                | P39900         | 4321         | MMP12           | 40       |
| 4498-62_2 | SL003764 | Neural cell adhesion molecule 1, 120 kDa isoform     | NCAM-120              | P13591         | 4684         | NCAM1           | 1        |
| 4499-21_1 | SL000535 | Platelet-derived growth factor subunit A             | PDGF-AA               | P04085         | 5154         | PDGFA           | 1        |
| 4500-50_2 | SL004363 | Stem cell growth factor-alpha                        | SCGF-alpha            | Q9Y240         | 6320         | CLEC11A         | 1        |

Table S1

| SeqId     | Somald   | TargetFullName                                                    | Target               | UniProt | EntrezGeneID | EntrezGeneSymbo | Dilution |
|-----------|----------|-------------------------------------------------------------------|----------------------|---------|--------------|-----------------|----------|
| 4533-76_2 | SL012740 | A disintegrin and metalloproteinase with thrombospondin motifs 15 | ATS15                | Q8TE58  | 170689       | ADAMTS15        | 40       |
| 4534-10_2 | SL012822 | Brain-specific serine protease 4                                  | BSSP4                | Q9GZN4  | 64063        | PRSS22          | 40       |
| 4535-50_2 | SL008644 | ADP-ribosyl cyclase/cyclic ADP-ribose hydrolase 2                 | BST1                 | Q10588  | 683          | BST1            | 40       |
| 4540-11_2 | SL009768 | Chromobox protein homolog 5                                       | CBX5                 | P45973  | 23468        | CBX5            | 40       |
| 4541-49_2 | SL014092 | Cell adhesion molecule-related/down-regulated by oncogenes        | CDON                 | Q4KMG0  | 50937        | CDON            | 1        |
| 4542-24_2 | SL001896 | Clusterin                                                         | Clusterin            | P10909  | 1191         | CLU             | 0.005    |
| 4543-65_2 | SL014048 | Collagen alpha-1(XXIII) chain                                     | CONA1                | Q86Y22  | 91522        | COL23A1         | 40       |
| 4544-4_3  | SL004708 | Connective tissue-activating peptide III                          | CTAP-III             | P02775  | 5473         | PPBP            | 0.005    |
| 4545-53_3 | SL006197 | Mitochondrial import inner membrane translocase subunit TIM14     | DnaJ homolog         | Q96DA6  | 131118       | DNAJC19         | 40       |
| 4546-27_3 | SL008822 | Adhesion G protein-coupled receptor E2                            | EMR2                 | Q9UHX3  | 30817        | ADGRE2          | 1        |
| 4547-59_2 | SL014071 | Leucine-rich repeat transmembrane protein FLRT1                   | FLRT1                | Q9NZU1  | 23769        | FLRT1           | 40       |
| 4548-4_2  | SL005575 | Galactoside 3(4)-L-fucosyltransferase                             | Fucosyltransferase 3 | P21217  | 2525         | FUT3            | 40       |
| 4549-78_2 | SL014008 | Alpha-(1,3)-fucosyltransferase 5                                  | FUT5                 | Q11128  | 2527         | FUT5            | 40       |
| 4551-72_3 | SL014094 | Adhesion G-protein coupled receptor G5                            | GP114                | Q8IZF4  | 221188       | ADGRG5          | 40       |
| 4553-65_3 | SL014009 | Hepatoma-derived growth factor-related protein 2                  | HDGR2                | Q7Z4V5  | 84717        | HDGFRP2         | 40       |
| 4556-10_2 | SL013548 | Interleukin-34                                                    | IL-34                | Q6ZMJ4  | 146433       | IL34            | 40       |
| 4557-61_2 | SL014111 | Kin of IRRE-like protein 3                                        | KIRR3                | Q8IZU9  | 84623        | KIRREL3         | 40       |
| 4559-64_2 | SL013969 | Kynureninase                                                      | KYNU                 | Q16719  | 8942         | KYNU            | 40       |
| 4561-65_2 | SL004299 | Baculoviral IAP repeat-containing protein 7 Isoform beta          | Livin B              | Q96CA5  | 79444        | BIRC7           | 40       |
| 4562-1_2  | SL012457 | Neurexophilin-1                                                   | NXPH1                | P58417  | 30010        | NXPH1           | 1        |
| 4563-61_2 | SL012108 | 1-phosphatidylinositol 4,5-bisphosphate phosphodiesterase gamma-1 | PLCG1                | P19174  | 5335         | PLCG1           | 40       |
| 4564-2_2  | SL006406 | Plexin-C1                                                         | PLXC1                | O60486  | 10154        | PLXNC1          | 1        |
| 4566-24_3 | SL013989 | R-spondin-2                                                       | RSPO2                | Q6UXX9  | 340419       | RSPO2           | 40       |
| 4567-82_2 | SL014468 | SH2 domain-containing protein 1A                                  | SH21A                | O60880  | 4068         | SH2D1A          | 40       |
| 4568-17_2 | SL014070 | SLIT and NTRK-like protein 5                                      | SLIK5                | O94991  | 26050        | SLITRK5         | 40       |

Table S1

| <b>SeqId</b> | <b>Somald</b> | <b>TargetFullName</b>                             | <b>Target</b>                  | <b>UniProt</b> | <b>EntrezGeneID</b> | <b>EntrezGeneSymbo</b> | <b>Dilution</b> |
|--------------|---------------|---------------------------------------------------|--------------------------------|----------------|---------------------|------------------------|-----------------|
| 4569-52_2    | SL014091      | VPS10 domain-containing receptor SorCS2           | SORC2                          | Q96PQ0         | 57537               | SORCS2                 | 40              |
| 4588-1_2     | SL011499      | Pancreatic hormone                                | PH                             | P01298         | 5539                | PPY                    | 40              |
| 4673-13_2    | SL000087      | Interleukin-6                                     | IL-6                           | P05231         | 3569                | IL6                    | 40              |
| 4693-72_2    | SL008085      | 3-hydroxyisobutyrate dehydrogenase, mitochondrial | 3HIDH                          | P31937         | 11112               | HIBADH                 | 40              |
| 4697-59_2    | SL001726      | Granulocyte-macrophage colony-stimulating factor  | GM-CSF                         | P04141         | 1437                | CSF2                   | 40              |
| 4703-87_2    | SL000597      | Lymphotoxin-alpha                                 | TNF-b                          | P01374         | 4049                | LTA                    | 40              |
| 4706-17_2    | SL010830      | Protein 4.1                                       | 41                             | P11171         | 2035                | EPB41                  | 1               |
| 4708-3_2     | SL004253      | Estradiol 17-beta-dehydrogenase 1                 | 17-beta-HSD 1                  | P14061         | 3292                | HSD17B1                | 1               |
| 4712-28_2    | SL005361      | Apolipoprotein D                                  | Apo D                          | P05090         | 347                 | APOD                   | 1               |
| 4717-55_2    | SL000479      | Interleukin-3                                     | IL-3                           | P08700         | 3562                | IL3                    | 40              |
| 4718-5_2     | SL007869      | Peptidyl-prolyl cis-trans isomerase B             | PPIB                           | P23284         | 5479                | PPIB                   | 1               |
| 4719-58_2    | SL003524      | Protein disulfide-isomerase A3                    | Protein disulfide isomerase A3 | P30101         | 2923                | PDIA3                  | 1               |
| 4721-54_2    | SL006119      | Trefoil factor 3                                  | TFF3                           | Q07654         | 7033                | TFF3                   | 1               |
| 4763-31_3    | SL004742      | Afamin                                            | Afamin                         | P43652         | 173                 | AFM                    | 0.005           |
| 4769-10_3    | SL008590      | Olfactomedin-4                                    | Olfactomedin-4                 | Q6UX06         | 10562               | OLFM4                  | 40              |
| 4771-10_3    | SL012754      | Acid sphingomyelinase-like phosphodiesterase 3a   | ASM3A                          | Q92484         | 10924               | SMPDL3A                | 1               |
| 4774-62_3    | SL016129      | Protein FAM107B                                   | FAM107B                        | Q9H098         | 83641               | FAM107B                | 40              |
| 4775-34_3    | SL005572      | Gelsolin                                          | Gelsolin                       | P06396         | 2934                | GSN                    | 0.005           |
| 4785-30_3    | SL000347      | Corticosteroid-binding globulin                   | CBG                            | P08185         | 866                 | SERPINA6               | 40              |
| 4786-58_3    | SL007871      | UMP-CMP kinase                                    | Cytidylate kinase              | P30085         | 51727               | CMPK1                  | 1               |
| 4801-13_3    | SL007153      | Lactoperoxidase                                   | PERL                           | P22079         | 4025                | LPO                    | 40              |
| 4807-13_3    | SL008072      | Collagen alpha-1(VIII) chain                      | CO8A1                          | P27658         | 1295                | COL8A1                 | 40              |
| 4811-33_3    | SL004739      | Inter-alpha-trypsin inhibitor heavy chain H4      | ITI heavy chain H4             | Q14624         | 3700                | ITIH4                  | 0.005           |
| 4815-25_3    | SL016128      | Thioredoxin domain-containing protein 12          | TXD12                          | O95881         | 51060               | TXNDC12                | 1               |

Table S1

| <b>SeqId</b> | <b>Somald</b> | <b>TargetFullName</b>                                 | <b>Target</b>          | <b>UniProt</b>    | <b>EntrezGeneID</b> | <b>EntrezGeneSymbo</b> | <b>Dilution</b> |
|--------------|---------------|-------------------------------------------------------|------------------------|-------------------|---------------------|------------------------|-----------------|
| 4829-43_6    | SL001737      | 14-3-3 protein sigma                                  | STRATIFIN              | P31947            | 2810                | SFN                    | 1               |
| 4831-4_2     | SL002823      | L-Selectin                                            | sL-Selectin            | P14151            | 6402                | SELL                   | 0.005           |
| 4832-75_2    | SL004156      | Tumor necrosis factor receptor superfamily member 10A | TRAIL R1               | O00220            | 8797                | TNFRSF10A              | 40              |
| 4834-61_2    | SL002654      | Ephrin type-A receptor 2                              | Epithelial cell kinase | P29317            | 1969                | EPHA2                  | 40              |
| 4840-73_1    | SL001729      | Granulocyte colony-stimulating factor                 | G-CSF                  | P09919            | 1440                | CSF3                   | 40              |
| 4842-62_2    | SL000070      | Glypican-3                                            | Glypican 3             | P51654            | 2719                | GPC3                   | 40              |
| 4851-25_1    | SL000125      | Interleukin-1 alpha                                   | IL-1a                  | P01583            | 3552                | IL1A                   | 40              |
| 4859-6_1     | SL004080      | Bone morphogenetic protein receptor type-1A           | BMPR1A                 | P36894            | 657                 | BMPR1A                 | 40              |
| 4862-63_1    | SL004133      | Bone morphogenetic protein receptor type-2            | BMP RII                | Q13873            | 659                 | BMPR2                  | 40              |
| 4866-59_2    | SL004160      | BDNF/NT-3 growth factors receptor                     | TrkB                   | Q16620            | 4915                | NTRK2                  | 1               |
| 4867-15_2    | SL003310      | Vascular endothelial growth factor A, isoform 121     | VEGF121                | P15692            | 7422                | VEGFA                  | 40              |
| 4874-3_1     | SL000003      | Angiogenin                                            | Angiogenin             | P03950            | 283                 | ANG                    | 0.005           |
| 4876-32_1    | SL000357      | Coagulation factor IX                                 | Coagulation Factor IX  | P00740            | 2158                | F9                     | 0.005           |
| 4878-3_1     | SL000360      | Coagulation Factor X                                  | Coagulation Factor X   | P00742            | 2159                | F10                    | 0.005           |
| 4880-21_1    | SL007756      | Growth/differentiation factor 2                       | GDF2                   | Q9UK05            | 2658                | GDF2                   | 40              |
| 4883-56_2    | SL000021      | Insulin                                               | Insulin                | P01308            | 3630                | INS                    | 40              |
| 4886-3_1     | SL000516      | C-C motif chemokine 7                                 | MCP-3                  | P80098            | 6354                | CCL7                   | 40              |
| 4889-82_1    | SL009951      | Protein Wnt-7a                                        | WNT7A                  | O00755            | 7476                | WNT7A                  | 40              |
| 4890-10_1    | SL003461      | Corticotropin                                         | ACTH                   | P01189            | 5443                | POMC                   | 40              |
| 4891-50_1    | SL000433      | Glucagon                                              | Glucagon               | P01275            | 2641                | GCG                    | 40              |
| 4900-8_1     | SL000313      | C3a anaphylatoxin                                     | C3a                    | P01024            | 718                 | C3                     | 0.005           |
| 4903-72_1    | SL003657      | Calcineurin                                           | Calcineurin            | Q08209 P63098     | 5530 5534           | PPP3CA PPP3R1          | 1               |
| 4904-7_1     | SL003710      | Caspase-2                                             | Caspase-2              | P42575            | 835                 | CASP2                  | 40              |
| 4905-63_1    | SL004814      | Coactosin-like protein                                | Coactosin-like protein | Q14019            | 23406               | COTL1                  | 1               |
| 4906-35_1    | SL000622      | Coagulation Factor V                                  | Coagulation Factor V   | P12259            | 2153                | F5                     | 0.005           |
| 4907-56_1    | SL000022      | D-dimer                                               | D-dimer                | P02671 P02675 P02 | 2243 2244 2266      | FGA FGB FGG            | 1               |
| 4908-6_1     | SL004482      | Endoglin                                              | Endoglin               | P17813            | 2022                | ENG                    | 40              |

Table S1

| <u>SeqId</u> | <u>Somald</u> | <u>TargetFullName</u>                   | <u>Target</u>                | <u>UniProt</u> | <u>EntrezGeneID</u> | <u>EntrezGeneSymbo</u> | <u>Dilution</u> |
|--------------|---------------|-----------------------------------------|------------------------------|----------------|---------------------|------------------------|-----------------|
| 4909-68_1    | SL005167      | Galectin-8                              | Galectin-8                   | O00214         | 3964                | LGALS8                 | 40              |
| 4910-21_1    | SL004064      | Phospholipase A2                        | GIB                          | P04054         | 5319                | PLA2G1B                | 40              |
| 4911-49_2    | SL003643      | Glutathione S-transferase P             | Glutathione S-transferase Pi | P09211         | 2950                | GSTP1                  | 1               |
| 4912-17_1    | SL000280      | Aspartate aminotransferase, cytoplasmic | GOT1                         | P17174         | 2805                | GOT1                   | 1               |
| 4913-78_1    | SL003300      | C-C motif chemokine 16                  | HCC-4                        | O15467         | 6360                | CCL16                  | 1               |
| 4914-10_1    | SL001766      | Human Chorionic Gonadotropin            | HCG                          | P01215,P01233  | 1081 1082           | CGA CGB                | 40              |
| 4915-64_2    | SL000836      | Hemoglobin                              | Hemoglobin                   | P69905, P68871 | 3039 3043           | HBA1 HBB               | 1               |
| 4916-2_1     | SL000460      | Immunoglobulin D                        | IgD                          | P01880         | 3495 50802 3535     | IGHD IGK@ IGL@         | 1               |
| 4917-62_1    | SL003182      | Integrin alpha-V: beta-5 complex        | Integrin aVb5                | P06756, P18084 | 3685 3693           | ITGAV ITGB5            | 40              |
| 4920-10_1    | SL000510      | Lysozyme C                              | Lysozyme                     | P61626         | 4069                | LYZ                    | 0.005           |
| 4922-13_1    | SL003189      | C-C motif chemokine 19                  | MIP-3b                       | Q99731         | 6363                | CCL19                  | 40              |
| 4923-79_1    | SL005201      | Muellerian-inhibiting factor            | MIS                          | P03971         | 268                 | AMH                    | 0.005           |
| 4924-32_1    | SL000521      | Interstitial collagenase                | MMP-1                        | P03956         | 4312                | MMP1                   | 1               |
| 4925-54_2    | SL000523      | Collagenase 3                           | MMP-13                       | P45452         | 4322                | MMP13                  | 40              |
| 4929-55_1    | SL005102      | Sex hormone-binding globulin            | SHBG                         | P04278         | 6462                | SHBG                   | 0.005           |
| 4930-21_1    | SL005789      | Stanniocalcin-1                         | Stanniocalcin-1              | P52823         | 6781                | STC1                   | 1               |
| 4931-59_1    | SL000024      | Tissue Factor                           | TF                           | P13726         | 2152                | F3                     | 40              |
| 4956-2_1     | SL000139      | Epiregulin                              | EPI                          | O14944         | 2069                | EREG                   | 40              |
| 4957-1_2     | SL004605      | 40S ribosomal protein SA                | 40S ribosomal protein SA     | P08865         | 3921                | RPSA                   | 1               |
| 4959-2_1     | SL004925      | Anterior gradient protein 2 homolog     | AGR2                         | O95994         | 10551               | AGR2                   | 40              |
| 4960-72_1    | SL004208      | Annexin A1                              | annexin I                    | P04083         | 301                 | ANXA1                  | 1               |
| 4961-17_1    | SL004209      | Annexin A2                              | annexin II                   | P07355         | 302                 | ANXA2                  | 40              |
| 4962-52_1    | SL012538      | Cerebral dopamine neurotrophic factor   | ARMEL                        | Q49AH0         | 441549              | CDNF                   | 40              |
| 4963-19_1    | SL011708      | cAMP-regulated phosphoprotein 19        | ARP19                        | P56211         | 10776               | ARPP19                 | 40              |
| 4964-67_1    | SL007729      | Endoplasmic reticulum aminopeptidase 1  | ARTS1                        | Q9NZ08         | 51752               | ERAP1                  | 40              |

Table S1

| <u>SeqId</u> | <u>Somald</u> | <u>TargetFullName</u>                                                | <u>Target</u>            | <u>UniProt</u> | <u>EntrezGeneID</u> | <u>EntrezGeneSymbo</u> | <u>Dilution</u> |
|--------------|---------------|----------------------------------------------------------------------|--------------------------|----------------|---------------------|------------------------|-----------------|
| 4965-27_1    | SL005675      | ATP synthase subunit beta, mitochondrial                             | ATP synthase beta chain  | P06576         | 506                 | ATP5B                  | 40              |
| 4967-1_1     | SL008177      | Complement component 1 Q subcomponent-binding protein, mitochondrial | C1QBP                    | Q07021         | 708                 | C1QBP                  | 1               |
| 4968-50_1    | SL008099      | Macrophage-capping protein                                           | CAPG                     | P40121         | 822                 | CAPG                   | 40              |
| 4969-2_1     | SL004866      | Carbonic anhydrase 1                                                 | Carbonic anhydrase I     | P00915         | 759                 | CA1                    | 1               |
| 4970-55_1    | SL000339      | Carbonic anhydrase 2                                                 | carbonic anhydrase II    | P00918         | 760                 | CA2                    | 40              |
| 4971-1_1     | SL008380      | Cathepsin Z                                                          | CATZ                     | Q9UBR2         | 1522                | CTSZ                   | 1               |
| 4973-18_1    | SL003728      | Baculoviral IAP repeat-containing protein 3                          | ciAP-2                   | Q13489         | 330                 | BIRC3                  | 40              |
| 4976-57_1    | SL013240      | Adapter molecule crk                                                 | CRK                      | P46108         | 1398                | CRK                    | 40              |
| 4978-54_2    | SL011628      | Drebrin-like protein                                                 | DBNL                     | Q9UJU6         | 28988               | DBNL                   | 1               |
| 4979-34_2    | SL008178      | Dermatopontin                                                        | DERM                     | Q07507         | 1805                | DPT                    | 1               |
| 4981-6_1     | SL008709      | Desmocollin-3                                                        | DSC3                     | Q14574         | 1825                | DSC3                   | 40              |
| 4982-54_1    | SL004458      | Elafin                                                               | Elafin                   | P19957         | 5266                | PI3                    | 1               |
| 4983-6_1     | SL003522      | Endoplasmic reticulum resident protein 29                            | ERP29                    | P30040         | 10961               | ERP29                  | 0.005           |
| 4984-83_1    | SL006378      | S-formylglutathione hydrolase                                        | Esterase D               | P10768         | 2098                | ESD                    | 1               |
| 4985-11_1    | SL005352      | Fatty acid-binding protein, epidermal                                | FABPE                    | Q01469         | 2171                | FABP5                  | 1               |
| 4986-59_1    | SL012248      | Focal adhesion kinase 1                                              | FAK1                     | Q05397         | 5747                | PTK2                   | 40              |
| 4987-17_1    | SL010373      | Immunoglobulin alpha Fc receptor                                     | FCAR                     | P24071         | 2204                | FCAR                   | 40              |
| 4988-49_2    | SL002036      | Fibroblast growth factor receptor 4                                  | FGFR4                    | P22455         | 2264                | FGFR4                  | 1               |
| 4989-7_1     | SL003341      | Fibrinogen gamma chain                                               | Fibrinogen g-chain dimer | P02679         | 2266                | FGG                    | 1               |
| 4990-87_1    | SL006460      | Platelet glycoprotein Ib alpha chain                                 | GP1BA                    | P07359         | 2811                | GP1BA                  | 1               |
| 4991-12_1    | SL012469      | Glypican-5                                                           | GPC5                     | P78333         | 2262                | GPC5                   | 40              |
| 4992-49_1    | SL007173      | Granulins                                                            | GRN                      | P28799         | 2896                | GRN                    | 1               |
| 4993-16_1    | SL000670      | Glutathione S-transferase A3                                         | GSTA3                    | Q16772         | 2940                | GSTA3                  | 40              |
| 4994-178_1   | SL002756      | Heterogeneous nuclear ribonucleoprotein K                            | hnRNP K                  | P61978         | 3190                | HNRNPK                 | 40              |



Table S1

| SeqId     | Somald   | TargetFullName                                   | Target                    | UniProt | EntrezGeneID | EntrezGeneSymbo | Dilution |
|-----------|----------|--------------------------------------------------|---------------------------|---------|--------------|-----------------|----------|
| 4995-16_1 | SL003930 | 15-hydroxyprostaglandin dehydrogenase [NAD(+)]   | HPG-                      | P15428  | 3248         | HPGD            | 1        |
| 4996-66_1 | SL006448 | Histidine-rich glycoprotein                      | HRG                       | P04196  | 3273         | HRG             | 0.005    |
| 4997-19_1 | SL011616 | Eukaryotic initiation factor 4A-III              | IF4A3                     | P38919  | 9775         | EIF4A3          | 40       |
| 4998-50_2 | SL007025 | Tyrosine-protein kinase JAK2                     | JAK2                      | O60674  | 3717         | JAK2            | 1        |
| 5000-52_1 | SL006522 | Galectin-3-binding protein                       | LG3BP                     | Q08380  | 3959         | LGALS3BP        | 1        |
| 5001-6_2  | SL001973 | Mammaglobin-B                                    | Mammaglobin 2             | O75556  | 4246         | SCGB2A1         | 1        |
| 5002-76_1 | SL002646 | Matrix metalloproteinase-14                      | MMP-14                    | P50281  | 4323         | MMP14           | 40       |
| 5004-69_1 | SL007453 | Mitogen-activated protein kinase 11              | MK11                      | Q15759  | 5600         | MAPK11          | 40       |
| 5005-4_1  | SL007281 | Mitogen-activated protein kinase 12              | MK12                      | P53778  | 6300         | MAPK12          | 40       |
| 5006-71_1 | SL006993 | Mitogen-activated protein kinase 13              | MK13                      | O15264  | 5603         | MAPK13          | 40       |
| 5007-1_1  | SL006920 | Mitogen-activated protein kinase 14              | MAPK14                    | Q16539  | 1432         | MAPK14          | 1        |
| 5008-51_1 | SL001815 | Superoxide dismutase [Mn], mitochondrial         | Mn SOD                    | P04179  | 6648         | SOD2            | 1        |
| 5009-11_1 | SL005846 | Moesin                                           | Moesin                    | P26038  | 4478         | MSN             | 40       |
| 5011-11_1 | SL003685 | Nicotinamide phosphoribosyltransferase           | PBEF                      | P43490  | 10135        | NAMPT           | 40       |
| 5012-67_1 | SL004296 | Adenylate kinase isoenzyme 1                     | Myokinase, human          | P00568  | 203          | AK1             | 1        |
| 5013-2_1  | SL004915 | Chloride intracellular channel protein 1         | NCC27                     | O00299  | 1192         | CLIC1           | 1        |
| 5014-49_1 | SL006091 | Cytoplasmic protein NCK1                         | NCK1                      | P16333  | 4690         | NCK1            | 40       |
| 5015-15_1 | SL003440 | Platelet-activating factor acetylhydrolase       | PAFAH                     | Q13093  | 7941         | PLA2G7          | 0.005    |
| 5016-61_2 | SL008933 | Protein deglycase DJ-1                           | PARK7                     | Q99497  | 11315        | PARK7           | 40       |
| 5017-19_1 | SL004932 | Peroxiredoxin-5, mitochondrial                   | Peroxiredoxin-5           | P30044  | 25824        | PRDX5           | 40       |
| 5018-68_1 | SL005694 | Peroxiredoxin-6                                  | Peroxiredoxin-6           | P30041  | 9588         | PRDX6           | 1        |
| 5019-16_2 | SL002803 | Ubiquitin carboxyl-terminal hydrolase isozyme L1 | UBPGP9.5                  | P09936  | 7345         | UCHL1           | 1        |
| 5020-50_1 | SL003653 | Phosphoglycerate kinase 1                        | phosphoglycerate kinase 1 | P00558  | 5230         | PGK1            | 1        |
| 5021-13_1 | SL004914 | Inorganic pyrophosphatase                        | PPase                     | Q15181  | 5464         | PPA1            | 1        |
| 5023-23_1 | SL009792 | Adenylosuccinate lyase                           | PUR8                      | P30566  | 158          | ADSL            | 40       |
| 5024-67_1 | SL002522 | Retinoblastoma-associated protein                | Rb                        | P06400  | 5925         | RB1             | 40       |

Table S1

| SeqId      | Somald   | TargetFullName                                           | Target                    | UniProt | EntrezGeneID | EntrezGeneSymbo | Dilution |
|------------|----------|----------------------------------------------------------|---------------------------|---------|--------------|-----------------|----------|
| 5026-66_1  | SL008059 | 40S ribosomal protein S3                                 | RS3                       | P23396  | 6188         | RPS3            | 40       |
| 5028-59_1  | SL005764 | Scavenger receptor cysteine-rich type 1 protein M130     | sCD163                    | Q86VB7  | 9332         | CD163           | 1        |
| 5029-3_1   | SL006528 | Prolyl endopeptidase FAP                                 | SEPR                      | Q12884  | 2191         | FAP             | 1        |
| 5030-52_1  | SL006629 | NAD-dependent protein deacetylase sirtuin-2              | SIRT2                     | Q8IXJ6  | 22933        | SIRT2           | 40       |
| 5031-10_1  | SL008190 | Spectrin alpha chain, non-erythrocytic 1                 | SPTA2                     | Q13813  | 6709         | SPTAN1          | 40       |
| 5032-64_1  | SL009868 | FACT complex subunit SSRP1                               | SSRP1                     | Q08945  | 6749         | SSRP1           | 40       |
| 5033-27_1  | SL004737 | Tropomyosin alpha-1 chain                                | Tropomyosin 1 alpha chain | P09493  | 7168         | TPM1            | 40       |
| 5034-79_1  | SL010388 | Trypsin-2                                                | Trypsin 2                 | P07478  | 5645         | PRSS2           | 1        |
| 5035-7_1   | SL000142 | Thymidylate synthase                                     | TS                        | P04818  | 7298         | TYMS            | 40       |
| 5036-50_1  | SL004782 | Tumor necrosis factor-inducible gene 6 protein           | TSG-6                     | P98066  | 7130         | TNFAIP6         | 40       |
| 5060-62_3  | SL004852 | Programmed cell death 1 ligand 1                         | B7-H1                     | Q9NZQ7  | 29126        | CD274           | 40       |
| 5061-27_3  | SL004853 | ICOS ligand                                              | B7-H2                     | O75144  | 23308        | ICOSLG          | 1        |
| 5062-60_3  | SL011100 | CD226 antigen                                            | CD226                     | Q15762  | 10666        | CD226           | 40       |
| 5063-12_2  | SL014188 | Natural killer cell receptor 2B4                         | CD244                     | Q9BZW8  | 51744        | CD244           | 40       |
| 5065-8_2   | SL014229 | CD83 antigen                                             | CD83                      | Q01151  | 9308         | CD83            | 40       |
| 5066-134_3 | SL014270 | CMRF35-like molecule 6                                   | CLM6                      | Q08708  | 10871        | CD300C          | 1        |
| 5068-54_3  | SL014208 | Cytotoxic and regulatory T-cell molecule                 | CRTAM                     | O95727  | 56253        | CRTAM           | 40       |
| 5069-9_3   | SL004556 | Complement decay-accelerating factor                     | DAF                       | P08174  | 1604         | CD55            | 1        |
| 5070-76_3  | SL003739 | Tumor necrosis factor receptor superfamily member 6B     | DcR3                      | O95407  | 8771         | TNFRSF6B        | 40       |
| 5076-53_2  | SL014294 | Ephrin type-A receptor 10                                | EPHAA                     | Q5JZY3  | 284656       | EPHA10          | 40       |
| 5077-28_3  | SL007179 | Ephrin type-B receptor 2                                 | EPHB2                     | P29323  | 2048         | EPHB2           | 1        |
| 5078-82_3  | SL008414 | Ephrin type-B receptor 6                                 | EphB6                     | O15197  | 2051         | EPHB6           | 1        |
| 5080-131_3 | SL007429 | Transmembrane glycoprotein NMB                           | GPNMB                     | Q14956  | 10457        | GPNMB           | 1        |
| 5082-51_3  | SL004849 | X-linked interleukin-1 receptor accessory protein like 2 | IL-1 sR9                  | Q9NP60  | 26280        | IL1RAPL2        | 1        |
| 5084-154_3 | SL005174 | Interleukin-17 receptor B                                | IL-17B R                  | Q9NRM6  | 55540        | IL17RB          | 1        |
| 5085-18_3  | SL005181 | Interleukin-20 receptor subunit alpha                    | IL-20 Ra                  | Q9UHF4  | 53832        | IL20RA          | 40       |
| 5087-5_3   | SL005183 | Interleukin-22 receptor subunit alpha-2                  | IL-22BP                   | Q969J5  | 116379       | IL22RA2         | 40       |
| 5088-175_3 | SL005185 | Interleukin-23 receptor                                  | IL-23 R                   | Q5VWK5  | 149233       | IL23R           | 40       |
| 5089-11_3  | SL005189 | Interleukin-7 receptor subunit alpha                     | IL-7 Ra                   | P16871  | 3575         | IL7R            | 40       |

Table S1

| <u>SeqId</u> | <u>Somald</u> | <u>TargetFullName</u>                                       | <u>Target</u>      | <u>UniProt</u> | <u>EntrezGeneID</u> | <u>EntrezGeneSymbol</u> | <u>Dilution</u> |
|--------------|---------------|-------------------------------------------------------------|--------------------|----------------|---------------------|-------------------------|-----------------|
| 5090-49_2    | SL005190      | Leukocyte immunoglobulin-like receptor subfamily B member 1 | ILT-2              | Q8NHL6         | 10859               | LILRB1                  | 1               |
| 5091-28_3    | SL005191      | Leukocyte immunoglobulin-like receptor subfamily B member 2 | ILT-4              | Q8N423         | 10288               | LILRB2                  | 1               |
| 5092-51_3    | SL007328      | Protein jagged-1                                            | JAG1               | P78504         | 182                 | JAG1                    | 1               |
| 5093-47_3    | SL007774      | Protein jagged-2                                            | JAG2               | Q9Y219         | 3714                | JAG2                    | 40              |
| 5094-62_3    | SL009202      | Junctional adhesion molecule-like                           | JAML1              | Q86YT9         | 120425              | AMICA1                  | 40              |
| 5095-21_3    | SL012698      | Killer cell immunoglobulin-like receptor 2DL4               | KI2L4              | Q99706         | 3805                | KIR2DL4                 | 40              |
| 5096-51_3    | SL014269      | Killer cell immunoglobulin-like receptor 3DL2               | KI3L2              | P43630         | 3812                | KIR3DL2                 | 40              |
| 5097-14_3    | SL014289      | Killer cell immunoglobulin-like receptor 3DS1               | KI3S1              | Q14943         | 3813                | KIR3DS1                 | 40              |
| 5098-79_3    | SL014209      | Killer cell lectin-like receptor subfamily F member 1       | KLRF1              | Q9NZS2         | 51348               | KLRF1                   | 40              |
| 5099-14_3    | SL005195      | Lymphocyte activation gene 3 protein                        | LAG-3              | P18627         | 3902                | LAG3                    | 40              |
| 5100-53_3    | SL005197      | Lysosome membrane protein 2                                 | LIMP II            | Q14108         | 950                 | SCARB2                  | 40              |
| 5102-55_3    | SL005200      | MHC class I polypeptide-related sequence B                  | MICB               | Q29980         | 4277                | MICB                    | 40              |
| 5103-30_3    | SL014288      | Cell surface glycoprotein CD200 receptor 1                  | MO2R1              | Q8TD46         | 131450              | CD200R1                 | 40              |
| 5104-57_3    | SL005207      | Natural cytotoxicity triggering receptor 1                  | NKp46              | O76036         | 9437                | NCR1                    | 40              |
| 5105-2_3     | SL005208      | Reticulon-4 receptor                                        | Nogo Receptor      | Q9BZR6         | 65078               | RTN4R                   | 1               |
| 5106-52_3    | SL007356      | Neurogenic locus notch homolog protein 2                    | NOTC2              | Q04721         | 4853                | NOTCH2                  | 40              |
| 5107-7_2     | SL005703      | Neurogenic locus notch homolog protein 1                    | Notch 1            | P46531         | 4851                | NOTCH1                  | 1               |
| 5108-72_3    | SL005209      | Neurogenic locus notch homolog protein 3                    | Notch-3            | Q9UM47         | 4854                | NOTCH3                  | 0.005           |
| 5109-24_3    | SL005210      | Neuronal cell adhesion molecule                             | Nr-CAM             | Q92823         | 4897                | NRCAM                   | 40              |
| 5110-84_3    | SL009054      | Neurexin-1-beta                                             | NRX1B              | P58400         | 9378                | NRXN1                   | 40              |
| 5111-15_3    | SL008728      | Neurexin-3-beta                                             | NRX3B              | Q9HDB5         | 9369                | NRXN3                   | 1               |
| 5112-73_3    | SL014268      | OX-2 membrane glycoprotein                                  | OX2G               | P41217         | 4345                | CD200                   | 40              |
| 5114-65_3    | SL005212      | Prolactin receptor                                          | Prolactin Receptor | P16471         | 5618                | PRLR                    | 1               |
| 5115-31_3    | SL005213      | Tumor necrosis factor receptor superfamily member 19L       | RELT               | Q969Z4         | 84957               | RELT                    | 40              |
| 5116-62_2    | SL007680      | Roundabout homolog 2                                        | ROBO2              | Q9HCK4         | 6092                | ROBO2                   | 1               |
| 5117-14_3    | SL014148      | Roundabout homolog 3                                        | ROBO3              | Q96MS0         | 64221               | ROBO3                   | 40              |
| 5121-3_2     | SL014248      | Semaphorin-6B                                               | SEM6B              | Q9H3T3         | 10501               | SEMA6B                  | 40              |

Table S1

| SeqId     | Somald   | TargetFullName                                                                 | Target        | UniProt           | EntrezGeneID   | EntrezGeneSymbo | Dilution |
|-----------|----------|--------------------------------------------------------------------------------|---------------|-------------------|----------------|-----------------|----------|
| 5122-92_2 | SL005214 | Semaphorin-6A                                                                  | Semaphorin-6A | Q9H2E6            | 57556          | SEMA6A          | 40       |
| 5124-69_3 | SL005169 | Intercellular adhesion molecule 5                                              | sICAM-5       | Q9UMF0            | 7087           | ICAM5           | 1        |
| 5125-6_3  | SL014292 | Sialic acid-binding Ig-like lectin 14                                          | SIG14         | Q08ET2            | 100049587      | SIGLEC14        | 1        |
| 5128-53_3 | SL014228 | SLAM family member 6                                                           | SLAF6         | Q96DU3            | 114836         | SLAMF6          | 40       |
| 5129-12_3 | SL005221 | Scavenger receptor class F member 1                                            | SREC-I        | Q14162            | 8578           | SCARF1          | 1        |
| 5130-67_3 | SL005222 | Scavenger receptor class F member 2                                            | SREC-II       | Q96GP6            | 91179          | SCARF2          | 40       |
| 5131-15_3 | SL004863 | Tumor necrosis factor receptor superfamily member 19                           | TAJ           | Q9NS68            | 55504          | TNFRSF19        | 40       |
| 5132-71_3 | SL005223 | Interleukin-27 receptor subunit alpha                                          | TCCR          | Q6UWB1            | 9466           | IL27RA          | 1        |
| 5133-17_3 | SL002078 | TGF-beta receptor type-2                                                       | TGF-b R II    | P37173            | 7048           | TGFBR2          | 40       |
| 5134-52_2 | SL007547 | Hepatitis A virus cellular receptor 2                                          | TIMD3         | Q8TDQ0            | 84868          | HAVCR2          | 40       |
| 5138-50_3 | SL004366 | Tumor necrosis factor receptor superfamily member 12A                          | TWEAKR        | Q9NP84            | 51330          | TNFRSF12A       | 40       |
| 5139-32_3 | SL005230 | Netrin receptor UNC5C                                                          | UNC5H3        | O95185            | 8633           | UNC5C           | 1        |
| 5140-56_3 | SL005231 | Netrin receptor UNC5D                                                          | UNC5H4        | Q6UXZ4            | 137970         | UNC5D           | 40       |
| 5178-5_3  | SL011406 | High affinity cAMP-specific 3',5'-cyclic phosphodiesterase 7A                  | PDE7A         | Q13946            | 5150           | PDE7A           | 40       |
| 5183-53_3 | SL016548 | AMP Kinase (alpha1beta1gamma1)                                                 | AMPK a1b1g1   | Q13131 Q9Y478 P54 | 5562 5564 5571 | PRKAA1 PRKAB1 P | 40       |
| 5193-51_3 | SL002542 | GTPase KRas                                                                    | K-ras         | P01116            | 3845           | KRAS            | 40       |
| 5196-7_3  | SL006476 | Glycylpeptide N-tetradecanoyltransferase 1                                     | NMT1          | P30419            | 4836           | NMT1            | 40       |
| 5201-50_4 | SL016554 | High affinity cGMP-specific 3',5'-cyclic phosphodiesterase 9A                  | PDE9A         | O76083            | 5152           | PDE9A           | 40       |
| 5202-4_3  | SL007373 | Peptidyl-prolyl cis-trans isomerase D                                          | PPID          | Q08752            | 5481           | PPID            | 40       |
| 5204-13_3 | SL005308 | Proteasome activator complex subunit 3                                         | PSME3         | P61289            | 10197          | PSME3           | 40       |
| 5223-59_3 | SL015728 | Glucokinase regulatory protein                                                 | GCKR          | Q14397            | 2646           | GCKR            | 40       |
| 5225-50_3 | SL016550 | Casein kinase II 2-alpha:2-beta heterotetramer                                 | CK2-A1:B      | P68400 P67870     | 1457 1460      | CSNK2A1 CSNK2B  | 40       |
| 5226-36_3 | SL016551 | Casein kinase II 2-alpha':2-beta heterotetramer                                | CK2-A2:B      | P19784 P67870     | 1459 1460      | CSNK2A2 CSNK2B  | 40       |
| 5227-60_3 | SL006921 | [Pyruvate dehydrogenase (acetyl-transferring)] kinase isozyme 1, mitochondrial | PDK1          | Q15118            | 5163           | PDK1            | 1        |
| 5228-25_2 | SL006189 | Kinesin-like protein KIF23                                                     | KIF23         | Q02241            | 9493           | KIF23           | 40       |
| 5229-90_3 | SL014735 | Inosine-5'-monophosphate dehydrogenase 1                                       | IMDH1         | P20839            | 3614           | IMPDH1          | 40       |

Table S1

| SeqId     | Somald   | TargetFullName                                                                                                   | Target              | UniProt           | EntrezGeneID   | EntrezGeneSymbol  | Dilution |
|-----------|----------|------------------------------------------------------------------------------------------------------------------|---------------------|-------------------|----------------|-------------------|----------|
| 5230-99_3 | SL016557 | 3-hydroxy-3-methylglutaryl-coenzyme A reductase                                                                  | HMGR                | P04035            | 3156           | HMGCR             | 40       |
| 5231-79_3 | SL012707 | Proprotein convertase subtilisin/kexin type 9                                                                    | PCSK9               | Q8NBP7            | 255738         | PCSK9             | 0.005    |
| 5236-2_3  | SL007145 | Nuclear receptor subfamily 1 group D member 1                                                                    | NR1D1               | P20393            | 9572           | NR1D1             | 40       |
| 5238-26_3 | SL013928 | Peptidyl-prolyl cis-trans isomerase E                                                                            | PPIE                | Q9UNP9            | 10450          | PPIE              | 40       |
| 5242-37_3 | SL007237 | Dual specificity mitogen-activated protein kinase 4                                                              | MP2K4               | P45985            | 6416           | MAP2K4            | 1        |
| 5244-12_3 | SL004716 | Mitogen-activated protein kinase 9                                                                               | JNK2                | P45984            | 5601           | MAPK9             | 40       |
| 5245-40_5 | SL016549 | AMP Kinase (alpha2beta2gamma1)                                                                                   | AMPK a2b2g1         | P54646 O43741 P54 | 5563 5565 5571 | PRKAA2 PRKAB2 PRK | 40       |
| 5246-64_3 | SL005730 | cGMP-dependent 3',5'-cyclic phosphodiesterase                                                                    | cGMP-stimulated PDE | O00408            | 5138           | PDE2A             | 1        |
| 5248-68_2 | SL005793 | Peptidyl-prolyl cis-trans isomerase F, mitochondrial                                                             | Cyclophilin F       | P30405            | 10105          | PPIF              | 40       |
| 5249-31_3 | SL016566 | Serine/threonine-protein kinase 17B                                                                              | DRAK2               | O94768            | 9262           | STK17B            | 1        |
| 5250-53_3 | SL010928 | Inosine-5'-monophosphate dehydrogenase 2                                                                         | IMDH2               | P12268            | 3615           | IMPDH2            | 1        |
| 5252-33_3 | SL016555 | Dual 3',5'-cyclic-AMP and -GMP phosphodiesterase 11A                                                             | PDE11               | Q9HCR9            | 50940          | PDE11A            | 1        |
| 5253-1_1  | SL011400 | Calcium/calmodulin-dependent 3',5'-cyclic nucleotide phosphodiesterase 1A                                        | PDE1A               | P54750            | 5136           | PDE1A             | 40       |
| 5254-69_3 | SL016553 | cGMP-inhibited 3',5'-cyclic phosphodiesterase A                                                                  | PDE3A               | Q14432            | 5139           | PDE3A             | 1        |
| 5255-22_3 | SL011404 | cAMP-specific 3',5'-cyclic phosphodiesterase 4D                                                                  | PDE4D               | Q08499            | 5144           | PDE4D             | 1        |
| 5256-86_3 | SL011405 | cGMP-specific 3',5'-cyclic phosphodiesterase                                                                     | PDE5A               | O76074            | 8654           | PDE5A             | 1        |
| 5259-2_3  | SL016567 | Mitogen-activated protein kinase kinase kinase 7:TGF-beta-activated kinase 1 and MAP3K7-binding protein 1 fusion | TAK1-TAB1           | O43318 Q15750     | 6885 10454     | MAP3K7 TAB1       | 1        |
| 5260-80_3 | SL007181 | Non-receptor tyrosine-protein kinase TYK2                                                                        | TYK2                | P29597            | 7297           | TYK2              | 1        |
| 5261-13_3 | SL010488 | Abelson tyrosine-protein kinase 2                                                                                | ABL2                | P42684            | 27             | ABL2              | 1        |
| 5262-57_3 | SL014470 | Breast cancer anti-estrogen resistance protein 3                                                                 | BCAR3               | O75815            | 8412           | BCAR3             | 1        |
| 5264-65_3 | SL003520 | Calreticulin                                                                                                     | calreticulin        | P27797            | 811            | CALR              | 1        |

Table S1

| SeqId      | Somald   | TargetFullName                                       | Target                         | UniProt | EntrezGeneID | EntrezGeneSymbo | Dilution |
|------------|----------|------------------------------------------------------|--------------------------------|---------|--------------|-----------------|----------|
| 5265-12_3  | SL005725 | GRB2-related adapter protein 2                       | GRB2-related adapter protein 2 | O75791  | 9402         | GRAP2           | 40       |
| 5268-49_3  | SL003331 | Matrix metalloproteinase-16                          | MMP-16                         | P51512  | 4325         | MMP16           | 40       |
| 5271-5_1   | SL007310 | Ras-related C3 botulinum toxin substrate 3           | RAC3                           | P60763  | 5881         | RAC3            | 40       |
| 5272-55_2  | SL014469 | SHC-transforming protein 1                           | SHC1                           | P29353  | 6464         | SHC1            | 1        |
| 5275-28_2  | SL014488 | Proto-oncogene vav                                   | VAV                            | P15498  | 7409         | VAV1            | 40       |
| 5280-68_5  | SL016563 | Mitochondrial glutamate carrier 2                    | GHC2                           | Q9H1K4  | 83733        | SLC25A18        | 40       |
| 5301-7_3   | SL000406 | Eotaxin                                              | Eotaxin                        | P51671  | 6356         | CCL11           | 1        |
| 5307-12_3  | SL004400 | Coagulation factor IXab                              | Coagulation Factor IXab        | P00740  | 2158         | F9              | 0.005    |
| 5308-89_2  | SL000401 | Neutrophil elastase                                  | Elastase                       | P08246  | 1991         | ELANE           | 1        |
| 5312-49_3  | SL000277 | Apolipoprotein E (isoform E2)                        | Apo E2                         | P02649  | 348          | APOE            | 0.005    |
| 5315-22_3  | SL000052 | Troponin T, cardiac muscle                           | Troponin T                     | P45379  | 7139         | TNNT2           | 1        |
| 5316-54_3  | SL000558 | Prothrombin                                          | Prothrombin                    | P00734  | 2147         | F2              | 0.005    |
| 5328-33_37 | SL016828 | Epidermal growth factor receptor variant III         | EGFRvIII                       | P00533  |              | EGFR            | 40       |
| 5335-73_3  | SL003647 | Annexin A6                                           | annexin VI                     | P08133  | 309          | ANXA6           | 40       |
| 5337-64_3  | SL004131 | T-lymphocyte activation antigen CD86                 | B7-2                           | P42081  | 942          | CD86            | 40       |
| 5339-49_3  | SL004477 | Protein S100-A9                                      | calgranulin B                  | P06702  | 6280         | S100A9          | 40       |
| 5340-24_3  | SL003717 | Caspase-10                                           | Caspase-10                     | Q92851  | 843          | CASP10          | 1        |
| 5343-74_3  | SL008703 | Carboxypeptidase E                                   | CBPE                           | P16870  | 1363         | CPE             | 40       |
| 5345-51_3  | SL006675 | Cytoskeleton-associated protein 2                    | CKAP2                          | Q8WWK9  | 26586        | CKAP2           | 40       |
| 5346-24_3  | SL011808 | Copine-1                                             | CPNE1                          | Q99829  | 8904         | CPNE1           | 1        |
| 5347-59_3  | SL000130 | G2/mitotic-specific cyclin-B1                        | Cyclin B1                      | P14635  | 891          | CCNB1           | 40       |
| 5349-69_3  | SL006970 | Delta-like protein 1                                 | DLL1                           | O00548  | 28514        | DLL1            | 1        |
| 5350-14_2  | SL012881 | Glypican-6                                           | GPC6                           | Q9Y625  | 10082        | GPC6            | 1        |
| 5351-52_3  | SL004891 | Heterogeneous nuclear ribonucleoproteins A2/B1       | hnRNP A2/B1                    | P22626  | 3181         | HNRNPA2B1       | 1        |
| 5352-11_3  | SL004145 | Tumor necrosis factor receptor superfamily member 14 | HVEM                           | Q92956  | 8764         | TNFRSF14        | 40       |

Table S1

| <b>SeqId</b> | <b>Somald</b> | <b>TargetFullName</b>                                      | <b>Target</b>        | <b>UniProt</b> | <b>EntrezGeneID</b> | <b>EntrezGeneSymbo</b> | <b>Dilution</b> |
|--------------|---------------|------------------------------------------------------------|----------------------|----------------|---------------------|------------------------|-----------------|
| 5353-89_2    | SL001990      | Interleukin-1 receptor antagonist protein                  | IL-1Ra               | P18510         | 3557                | IL1RN                  | 1               |
| 5354-11_3    | SL000655      | Keratin, type I cytoskeletal 18                            | Keratin 18           | P05783         | 3875                | KRT18                  | 40              |
| 5355-69_3    | SL004648      | Tumor necrosis factor ligand superfamily member 14         | LIGHT                | O43557         | 8740                | TNFSF14                | 40              |
| 5356-2_3     | SL003080      | Macrophage migration inhibitory factor                     | MIF                  | P14174         | 4282                | MIF                    | 1               |
| 5357-60_3    | SL014113      | Neuroigin-4, X-linked                                      | NLGNX                | Q8N0W4         | 57502               | NLGN4X                 | 40              |
| 5358-3_3     | SL008574      | Osteomodulin                                               | OMD                  | Q99983         | 4958                | OMD                    | 1               |
| 5359-65_3    | SL002702      | Serine/threonine-protein kinase pim-1                      | PIM1                 | P11309         | 5292                | PIM1                   | 40              |
| 5360-9_2     | SL003722      | RAC-beta serine/threonine-protein kinase                   | PKB beta             | P31751         | 208                 | AKT2                   | 1               |
| 5363-51_3    | SL010470      | Semaphorin-3E                                              | Semaphorin 3E        | O15041         | 9723                | SEMA3E                 | 40              |
| 5364-7_3     | SL007336      | Protein SET                                                | SET                  | Q01105         | 6418                | SET                    | 1               |
| 5383-14_3    | SL004671      | Tumor necrosis factor receptor superfamily member 13C      | BAFF Receptor        | Q96RJ3         | 115650              | TNFRSF13C              | 1               |
| 5384-67_3    | SL016130      | Transcription factor IIB 90 kDa subunit                    | BRF-1                | Q92994         | 2972                | BRF1                   | 40              |
| 5392-73_2    | SL002731      | Tumor necrosis factor receptor superfamily member 6        | Fas, soluble         | P25445         | 355                 | FAS                    | 1               |
| 5400-52_3    | SL003184      | Leptin receptor                                            | sLeptin R            | P48357         | 3953                | LEPR                   | 1               |
| 5404-53_3    | SL004871      | Tumor necrosis factor receptor superfamily member 21       | DR6                  | O75509         | 27242               | TNFRSF21               | 1               |
| 5410-53_3    | SL007295      | Cadherin-15                                                | CAD15                | P55291         | 1013                | CDH15                  | 1               |
| 5412-53_3    | SL004134      | CD27 antigen                                               | CD27                 | P26842         | 939                 | CD27                   | 0.005           |
| 5424-55_3    | SL003690      | Tumor necrosis factor receptor superfamily member 11A      | RANK                 | Q9Y6Q6         | 8792                | TNFRSF11A              | 1               |
| 5430-66_3    | SL008967      | Tyrosine-protein phosphatase non-receptor type substrate 1 | SHPS1                | P78324         | 140885              | SIRPA                  | 40              |
| 5451-1_3     | SL003166      | CD166 antigen                                              | ALCAM                | Q13740         | 214                 | ALCAM                  | 1               |
| 5452-71_3    | SL008835      | Asialoglycoprotein receptor 1                              | ASGR1                | P07306         | 432                 | ASGR1                  | 1               |
| 5456-59_2    | SL006694      | Beta-Ala-His dipeptidase                                   | CNDP1                | Q96KN2         | 84735               | CNDP1                  | 0.005           |
| 5457-5_2     | SL007471      | Collectin-12                                               | COLEC12              | Q5KU26         | 81035               | COLEC12                | 40              |
| 5459-33_3    | SL010456      | Cystatin-SN                                                | CYTN                 | P01037         | 1469                | CST1                   | 1               |
| 5460-60_3    | SL004750      | ATP-dependent RNA helicase DDX19B                          | DEAD-box protein 19B | Q9UMR2         | 11269               | DDX19B                 | 40              |
| 5462-62_3    | SL002086      | Ficolin-3                                                  | Ficolin-3            | O75636         | 8547                | FCN3                   | 0.005           |

Table S1

| SeqId     | Somald   | TargetFullName                                        | Target                                      | UniProt | EntrezGeneID | EntrezGeneSymbo | Dilution |
|-----------|----------|-------------------------------------------------------|---------------------------------------------|---------|--------------|-----------------|----------|
| 5463-22_3 | SL000658 | Growth arrest-specific protein 1                      | GAS1                                        | P54826  | 2619         | GAS1            | 1        |
| 5464-52_3 | SL003792 | Growth factor receptor-bound protein 2                | GRB2<br>adapter<br>protein                  | P62993  | 2885         | GRB2            | 1        |
| 5465-32_3 | SL014129 | Heparan-sulfate 6-O-sulfotransferase 1                | H6ST1                                       | O60243  | 9394         | HS6ST1          | 1        |
| 5467-15_3 | SL000454 | Heat shock protein HSP 90-beta                        | HSP 90b                                     | P08238  | 3326         | HSP90AB1        | 1        |
| 5468-67_3 | SL011068 | Interleukin-17 receptor C                             | IL-17 RC                                    | Q8NAC3  | 84818        | IL17RC          | 40       |
| 5470-69_2 | SL010328 | Mediator of RNA polymerase II transcription subunit 1 | MED-1                                       | Q15648  | 5469         | MED1            | 1        |
| 5475-10_3 | SL000553 | Protein kinase C beta type (splice variant beta-II)   | PKC-B-II                                    | P05771  | 5579         | PRKCB           | 40       |
| 5476-66_3 | SL000556 | Protein kinase C gamma type                           | PKC-G                                       | P05129  | 5582         | PRKCG           | 40       |
| 5478-50_2 | SL000158 | Glutamate carboxypeptidase 2                          | PSMA                                        | Q04609  | 2346         | FOLH1           | 40       |
| 5480-49_3 | SL000563 | C-C motif chemokine 5                                 | RANTES                                      | P13501  | 6352         | CCL5            | 1        |
| 5481-16_3 | SL013754 | Ras GTPase-activating protein 1                       | RASA1                                       | P20936  | 5921         | RASA1           | 40       |
| 5482-61_3 | SL000566 | Retinol-binding protein 4                             | RBP                                         | P02753  | 5950         | RBP4            | 0.005    |
| 5483-1_3  | SL010467 | Repulsive guidance molecule A                         | RGMA                                        | Q96B86  | 56963        | RGMA            | 1        |
| 5484-63_3 | SL011588 | 40S ribosomal protein S3a                             | RS3A                                        | P61247  | 6189         | RPS3A           | 40       |
| 5486-73_3 | SL003177 | Intercellular adhesion molecule 2                     | sICAM-2                                     | P13598  | 3384         | ICAM2           | 1        |
| 5487-7_3  | SL016928 | SLAM family member 7                                  | SLAF7                                       | Q9NQ25  | 57823        | SLAMF7          | 40       |
| 5488-74_3 | SL010516 | Proto-oncogene tyrosine-protein kinase Src            | SRCN1                                       | P12931  | 6714         | SRC             | 40       |
| 5489-18_3 | SL010250 | Stress-induced-phosphoprotein 1                       | Stress-<br>induced-<br>phosphopro<br>tein 1 | P31948  | 10963        | STIP1           | 1        |
| 5490-53_3 | SL010384 | Testican-1                                            | Testican-1                                  | Q08629  | 6695         | SPOCK1          | 1        |
| 5491-12_3 | SL010471 | Testican-2                                            | Testican-2                                  | Q92563  | 9806         | SPOCK2          | 1        |
| 5493-17_3 | SL010524 | Serine/threonine-protein kinase WNK3                  | WNK3                                        | Q9BYP7  | 65267        | WNK3            | 1        |
| 5494-52_3 | SL009790 | Small nuclear ribonucleoprotein F                     | RUXF                                        | P62306  | 6636         | SNRPF           | 1        |
| 5508-62_3 | SL000344 | Cathepsin D                                           | Cathepsin D                                 | P07339  | 1509         | CTSD            | 0.005    |
| 5509-7_3  | SL000084 | Epidermal growth factor                               | EGF                                         | P01133  | 1950         | EGF             | 1        |
| 5526-53_3 | SL004859 | Tumor necrosis factor receptor superfamily member 18  | GITR                                        | Q9Y5U5  | 8784         | TNFRSF18        | 40       |



Table S1

| <b>SeqId</b> | <b>Somald</b> | <b>TargetFullName</b>                                 | <b>Target</b>             | <b>UniProt</b> | <b>EntrezGeneID</b> | <b>EntrezGeneSymbo</b> | <b>Dilution</b> |
|--------------|---------------|-------------------------------------------------------|---------------------------|----------------|---------------------|------------------------|-----------------|
| 5532-53_3    | SL003060      | Fibroblast growth factor receptor 1                   | bFGF-R                    | P11362         | 2260                | FGFR1                  | 0.005           |
| 5534-49_2    | SL004157      | Tumor necrosis factor receptor superfamily member 10B | TRAIL R2                  | O14763         | 8795                | TNFRSF10B              | 40              |
| 5542-22_2    | SL006397      | Neuropilin-1                                          | NRP1                      | O14786         | 8829                | NRP1                   | 0.005           |
| 5792-8_2     | SL000011      | alpha-Fetoprotein                                     | AFP                       | P02771         | 174                 | AFP                    | 40              |
| 5798-3_3     | SL003704      | BH3-interacting domain death agonist                  | BID                       | P55957         | 637                 | BID                    | 40              |
| 5801-72_3    | SL000305      | beta-nerve growth factor                              | b-NGF                     | P01138         | 4803                | NGF                    | 40              |
| 5803-24_3    | SL003362      | Complement C3d fragment                               | C3d                       | P01024         | 718                 | C3                     | 0.005           |
| 5807-77_3    | SL007195      | CD70 antigen                                          | CD70                      | P32970         | 970                 | CD70                   | 40              |
| 5810-25_3    | SL005155      | Teratocarcinoma-derived growth factor 1               | Cripto                    | P13385         | 6997                | TDGF1                  | 40              |
| 5813-58_3    | SL000408      | Erythropoietin                                        | Epo                       | P01588         | 2056                | EPO                    | 40              |
| 5822-22_3    | SL004248      | Glial cell line-derived neurotrophic factor           | GDNF                      | P39905         | 2668                | GDNF                   | 40              |
| 5825-49_3    | SL000458      | Interferon gamma receptor 1                           | IFN-g R1                  | P15260         | 3459                | IFNGR1                 | 40              |
| 5834-18_3    | SL000485      | Interleukin-9                                         | IL-9                      | P15248         | 3578                | IL9                    | 40              |
| 5837-49_3    | SL004714      | Leukemia inhibitory factor receptor                   | LIF sR                    | P42702         | 3977                | LIFR                   | 40              |
| 5843-60_3    | SL003542      | Histone-lysine N-methyltransferase EHMT2              | NG36                      | Q96KQ7         | 10919               | EHMT2                  | 1               |
| 5846-24_3    | SL004683      | Noggin                                                | Noggin                    | Q13253         | 9241                | NOG                    | 1               |
| 5852-6_3     | SL004783      | Protein S100-A12                                      | S100A12                   | P80511         | 6283                | S100A12                | 1               |
| 5854-60_3    | SL004230      | Microtubule-associated protein tau                    | tau                       | P10636         | 4137                | MAPT                   | 40              |
| 5858-6_5     | SL005688      | 14-3-3 protein zeta/delta                             | 14-3-3 protein zeta/delta | P63104         | 7534                | YWHAZ                  | 1               |
| 5861-78_3    | SL008466      | 3-hydroxyanthranilate 3,4-dioxygenase                 | 3HAO                      | P46952         | 23498               | HAAO                   | 1               |
| 5864-10_3    | SL004910      | Fructose-bisphosphate aldolase A                      | aldolase A                | P04075         | 226                 | ALDOA                  | 1               |
| 5867-60_3    | SL008008      | Arginase-1                                            | ARG1                      | P05089         | 383                 | ARG1                   | 40              |
| 5870-23_2    | SL003700      | Bcl2-associated agonist of cell death                 | BAD                       | Q92934         | 572                 | BAD                    | 40              |
| 5879-51_3    | SL009207      | Dynactin subunit 2                                    | Dynactin subunit 2        | Q13561         | 10540               | DCTN2                  | 1               |
| 5882-34_2    | SL005685      | Elongation factor 1-beta                              | EF-1-beta                 | P24534         | 1933                | EEF1B2                 | 40              |
| 5885-55_3    | SL004924      | Eukaryotic translation initiation factor 4H           | eIF-4H                    | Q15056         | 7458                | EIF4H                  | 1               |
| 5888-29_3    | SL005687      | Eukaryotic translation initiation factor 5A-1         | eIF-5A-1                  | P63241         | 1984                | EIF5A                  | 1               |
| 5897-58_3    | SL002071      | Gastrin-releasing peptide                             | Gastrin-releasing peptide | P07492         | 2922                | GRP                    | 40              |

Table S1

| <u>SeqId</u> | <u>Somald</u> | <u>TargetFullName</u>                                         | <u>Target</u>                          | <u>UniProt</u> | <u>EntrezGeneID</u> | <u>EntrezGeneSymbo</u> | <u>Dilution</u> |
|--------------|---------------|---------------------------------------------------------------|----------------------------------------|----------------|---------------------|------------------------|-----------------|
| 5900-11_2    | SL009431      | Histidine triad nucleotide-binding protein 1                  | HINT1                                  | P49773         | 3094                | HINT1                  | 40              |
| 5903-91_2    | SL004899      | Heat shock cognate 71 kDa protein                             | HSP70<br>protein 8                     | P11142         | 3312                | HSPA8                  | 1               |
| 5909-51_3    | SL003687      | Nucleoside diphosphate kinase A                               | Nucleoside<br>diphosphat<br>e kinase A | P15531         | 4830                | NME1                   | 1               |
| 5915-58_3    | SL012148      | Peroxisomal targeting signal 1 receptor                       | PEX5                                   | P50542         | 5830                | PEX5                   | 40              |
| 5918-5_3     | SL008176      | Proteasome activator complex subunit 1                        | PSME1                                  | Q06323         | 5720                | PSME1                  | 1               |
| 5921-58_3    | SL004829      | Protein S100-A7                                               | S100A7                                 | P31151         | 6278                | S100A7                 | 40              |
| 5927-4_3     | SL004690      | WNT1-inducible-signaling pathway protein 3                    | WISP-3                                 | O95389         | 8838                | WISP3                  | 40              |
| 5934-1_3     | SL000420      | Ferritin                                                      | Ferritin                               | P02794 P02792  | 2495 2512           | FTH1 FTL               | 1               |
| 5936-53_3    | SL002517      | Tumor necrosis factor                                         | TNF-a                                  | P01375         | 7124                | TNF                    | 40              |
| 5939-42_3    | SL004365      | Tumor necrosis factor ligand superfamily<br>member 12         | TWEAK                                  | O43508         | 8742                | TNFSF12                | 40              |
| 5947-90_3    | SL000598      | Thrombopoietin                                                | Tpo                                    | P40225         | 7066                | THPO                   | 40              |
| 5954-62_3    | SL003970      | Parathyroid hormone                                           | PTH                                    | P01270         | 5741                | PTH                    | 40              |
| 5957-30_3    | SL011510      | Somatostatin-28                                               | Somatostati<br>n-28                    | P61278         | 6750                | SST                    | 40              |
| 6151-18_3    | SL007242      | Dual specificity mitogen-activated protein kinase<br>kinase 3 | MP2K3                                  | P46734         | 5606                | MAP2K3                 | 40              |
| 6152-111_3   | SL000074      | Cellular tumor antigen p53                                    | p53                                    | P04637         | 7157                | TP53                   | 1               |
| 6641-60_3    | SL017289      | PolyUbiquitin K48-linked                                      | PolyUbiquiti<br>n K48                  | P0CG47         | 7314                | UBB                    | 1               |
| 6647-55_3    | SL017290      | PolyUbiquitin K63-linked                                      | PolyUbiquiti<br>n K63                  | P0CG48         | 7316                | UBC                    | 1               |
| 6649-51_3    | SL012395      | Netrin-1                                                      | NET1                                   | O95631         | 9423                | NTN1                   | 40              |
| 6653-58_3    | SL004838      | Leukocyte surface antigen CD47                                | CD47                                   | Q08722         | 961                 | CD47                   | 40              |
| 7624-19_3    | SL014896      | Ankyrin-2                                                     | ANK2                                   | Q01484         | 287                 | ANK2                   | 40              |
| 7625-27_3    | SL008071      | 14-3-3 protein theta                                          | 14-3-3<br>protein<br>theta             | P27348         | 10971               | YWHAQ                  | 1               |
| 7628-40_3    | SL012774      | Cysteine-rich with EGF-like domain protein 1                  | CREL1                                  | Q96HD1         | 78987               | CRELD1                 | 1               |

Table S1

| SeqId      | Somald   | TargetFullName                                             | Target                    | UniProt       | EntrezGeneID | EntrezGeneSymbo | Dilution |
|------------|----------|------------------------------------------------------------|---------------------------|---------------|--------------|-----------------|----------|
| 7638-30_3  | SL005403 | Vesicular integral-membrane protein VIP36                  | Lectin, mannose-binding 2 | Q12907        | 10960        | LMAN2           | 0.005    |
| 7640-29_3  | SL013872 | Low-density lipoprotein receptor-related protein 1B        | LRP1B                     | Q9NZR2        | 53353        | LRP1B           | 0.005    |
| 7648-9_3   | SL017328 | Myosin-binding protein C, slow-type                        | MYPC1                     | Q00872        | 4604         | MYBPC1          | 1        |
| 7655-11_3  | SL002785 | N-terminal pro-BNP                                         | N-terminal pro-BNP        | P16860        | 4879         | NPPB            | 40       |
| 7660-21_3  | SL003646 | Tropomyosin alpha-4 chain                                  | Tropomyosin 4             | P67936        | 7171         | TPM4            | 1        |
| 8446-4_3   | SL011508 | Pituitary adenylate cyclase-activating polypeptide 27      | PACAP-27                  | P18509        | 116          | ADCYAP1         | 40       |
| 8447-11_3  | SL004269 | Appetite-regulating hormone                                | ghrelin                   | Q9UBU3        | 51738        | GHRL            | 40       |
| 8450-36_3  | SL011498 | Pituitary adenylate cyclase-activating polypeptide 38      | PACAP-38                  | P18509        | 116          | ADCYAP1         | 40       |
| 8458-111_3 | SL005266 | Alpha-synuclein                                            | a-Synuclein               | P37840        | 6622         | SNCA            | 1        |
| 8459-10_3  | SL003993 | Bone morphogenetic protein 6                               | BMP-6                     | P22004        | 654          | BMP6            | 1        |
| 8462-18_3  | SL000442 | Somatotropin                                               | HGH                       | P01241        | 2688         | GH1             | 40       |
| 8463-2_3   | SL003672 | Extracellular superoxide dismutase [Cu-Zn]                 | SOD3                      | P08294        | 6649         | SOD3            | 0.005    |
| 8464-31_3  | SL012517 | R-spondin-4                                                | RSPO4                     | Q2I0M5        | 343637       | RSPO4           | 40       |
| 8465-52_3  | SL000346 | Cathepsin H                                                | Cathepsin H               | P09668        | 1512         | CTSH            | 40       |
| 8467-9_3   | SL004837 | Inhibin beta A chain:Inhibin beta B chain heterodimer      | Activin AB                | P08476 P09529 | 3624 3625    | INHBA INHBB     | 40       |
| 8468-19_3  | SL000062 | Prostate-specific antigen                                  | PSA                       | P07288        | 354          | KLK3            | 40       |
| 8469-41_3  | SL000466 | Insulin-like growth factor-binding protein 2               | IGFBP-2                   | P18065        | 3485         | IGFBP2          | 0.005    |
| 8470-213_3 | SL017528 | Ribonuclease H1                                            | RNase H1                  | O60930        | 246243       | RNASEH1         | 40       |
| 8474-6_3   | SL006114 | Tyrosine-protein kinase transmembrane receptor ROR1        | ROR1                      | Q01973        | 4919         | ROR1            | 1        |
| 8476-11_3  | SL002762 | Chromogranin-A                                             | CgA                       | P10645        | 1113         | CHGA            | 1        |
| 8479-4_3   | SL000645 | Stromelysin-2                                              | MMP-10                    | P09238        | 4319         | MMP10           | 40       |
| 8480-29_3  | SL006527 | EGF-containing fibulin-like extracellular matrix protein 1 | FBLN3                     | Q12805        | 2202         | EFEMP1          | 0.005    |
| 8484-24_3  | SL000498 | Leptin                                                     | Leptin                    | P41159        | 3952         | LEP             | 1        |

Table S1

| SeqId      | Somald   | TargetFullName                                              | Target                   | UniProt       | EntrezGeneID | EntrezGeneSymbo | Dilution |
|------------|----------|-------------------------------------------------------------|--------------------------|---------------|--------------|-----------------|----------|
| 8485-7_3   | SL017529 | Kelch-like ECH-associated protein 1                         | KEAP1                    | Q14145        | 9817         | KEAP1           | 1        |
| 8488-33_3  | SL000542 | Integrin alpha-IIb: beta-3 complex                          | gpIIbIIIa                | P08514 P05106 | 3674 3690    | ITGA2B ITGB3    | 40       |
| 9168-31_3  | SL003170 | C-C motif chemokine 26                                      | Eotaxin-3                | Q9Y258        | 10344        | CCL26           | 40       |
| 9169-14_3  | SL018938 | Small ubiquitin-related modifier 3                          | SUMO3                    | P55854        | 6613         | SUMO3           | 1        |
| 9170-24_3  | SL001713 | Interleukin-17A                                             | IL-17                    | Q16552        | 3605         | IL17A           | 40       |
| 9171-11_3  | SL016969 | Cysteine and glycine-rich protein 3                         | CSRP3                    | P50461        | 8048         | CSRP3           | 40       |
| 9172-69_3  | SL000526 | Neutrophil collagenase                                      | MMP-8                    | P22894        | 4317         | MMP8            | 1        |
| 9173-21_3  | SL008094 | Phosphoglucomutase-1                                        | PGM1                     | P36871        | 5236         | PGM1            | 40       |
| 9175-48_3  | SL018891 | Down syndrome cell adhesion molecule                        | DSCAM                    | O60469        | 1826         | DSCAM           | 40       |
| 9176-3_3   | SL000001 | Mucin-1                                                     | MUC1                     | P15941        | 4582         | MUC1            | 40       |
| 9177-6_3   | SL007306 | Protein FAM3B                                               | FAM3B                    | P58499        | 54097        | FAM3B           | 1        |
| 9178-30_3  | SL004297 | Neuregulin-1                                                | NEUREGULIN-1             | Q02297        | 3084         | NRG1            | 40       |
| 9180-6_3   | SL007217 | Interferon gamma receptor 2                                 | INGR2                    | P38484        | 3460         | IFNGR2          | 40       |
| 9182-3_3   | SL004733 | Low-density lipoprotein receptor-related protein 1, soluble | sLRP1                    | Q07954        | 4035         | LRP1            | 40       |
| 9183-7_3   | SL004475 | Interferon alpha/beta receptor 1                            | IFN-a/b R1               | P17181        | 3454         | IFNAR1          | 1        |
| 9185-15_3  | SL008591 | Trefoil factor 1                                            | TFF1                     | P04155        | 7031         | TFF1            | 40       |
| 9187-2_3   | SL013165 | Non-histone chromosomal protein HMG-14                      | HMGN1                    | P05114        | 3150         | HMGN1           | 1        |
| 9188-119_3 | SL003188 | C-X-C motif chemokine 9                                     | MIG                      | Q07325        | 4283         | CXCL9           | 40       |
| 9190-7_3   | SL008837 | CD63 antigen                                                | CD63                     | P08962        | 967          | CD63            | 1        |
| 9191-8_3   | SL002602 | Trefoil factor 2                                            | Trefoil factor 2         | Q03403        | 7032         | TFF2            | 1        |
| 9196-8_3   | SL005166 | Galectin-7                                                  | Galectin-7               | P47929        | 3963         | LGALS7          | 1        |
| 9197-4_3   | SL008486 | Galectin-9                                                  | LEG9                     | O00182        | 3965         | LGALS9          | 40       |
| 9199-6_3   | SL018946 | Ubiquitin-conjugating enzyme E2 G2                          | UB2G2                    | P60604        | 7327         | UBE2G2          | 1        |
| 9201-13_3  | SL004811 | Transgelin-2                                                | Transgelin-2             | P37802        | 8407         | TAGLN2          | 1        |
| 9202-309_3 | SL008113 | ATP synthase subunit O, mitochondrial                       | ATPO                     | P48047        | 539          | ATP5O           | 40       |
| 9204-33_3  | SL009210 | Pro-opiomelanocortin                                        | Corticotropin-lipotropin | P01189        | 5443         | POMC            | 40       |
| 9207-60_3  | SL018887 | Quinone oxidoreductase-like protein 1                       | QORL1                    | O95825        | 9946         | CRYZL1          | 1        |
| 9211-19_3  | SL003066 | Pigment epithelium-derived factor                           | PEDF                     | P36955        | 5176         | SERPINF1        | 0.005    |
| 9212-22_3  | SL008381 | Cathepsin F                                                 | CATF                     | Q9UBX1        | 8722         | CTSF            | 1        |

Table S1

| <u>SeqId</u> | <u>Somald</u> | <u>TargetFullName</u>                    | <u>Target</u> | <u>UniProt</u> | <u>EntrezGeneID</u> | <u>EntrezGeneSymbo</u> | <u>Dilution</u> |
|--------------|---------------|------------------------------------------|---------------|----------------|---------------------|------------------------|-----------------|
| 9213-24_3    | SL018900      | Formimidoyltransferase-cyclodeaminase    | FTCD          | O95954         | 10841               | FTCD                   | 40              |
| 9215-117_3   | SL018947      | Ubiquitin carboxyl-terminal hydrolase 25 | UBP25         | Q9UHP3         | 29761               | USP25                  | 40              |
| 9216-100_3   | SL009948      | Plexin-B2                                | PLXB2         | O15031         | 23654               | PLXNB2                 | 1               |

Table S2

| <b>Table S2:List of association of protein variables with Apnea index (used as continous variable).</b> |          |                |              |          |                |                                                         |                              |                        |               |
|---------------------------------------------------------------------------------------------------------|----------|----------------|--------------|----------|----------------|---------------------------------------------------------|------------------------------|------------------------|---------------|
| <b>vars</b>                                                                                             | <b>t</b> | <b>P.Value</b> | <b>logFC</b> | <b>B</b> | <b>5%FDR P</b> | <b>TargetFullName</b>                                   | <b>UniProt</b>               | <b>EntrezID</b>        | <b>Symbol</b> |
| tPA                                                                                                     | 4.894    | 1.23E-06       | 0.0038       | 2.274    | 0.000980       | Tissue-type plasminogen activator                       | P00750                       | 5327                   | PLAT          |
| Laminin                                                                                                 | 4.851    | 1.51E-06       | 0.0033       | 2.075    | 0.000980       | Laminin                                                 | P25391,<br>P07942,<br>P11047 | 284217<br>3912<br>3915 | LAMA1         |
| IGFBP-1                                                                                                 | -4.586   | 5.35E-06       | -0.0097      | 0.859    | 0.002314       | Insulin-like growth factor-binding protein 1            | P08833                       | 3484                   | IGFBP1        |
| Carbonic anhydrase I                                                                                    | -4.266   | 2.26E-05       | -0.0105      | -0.520   | 0.006852       | Carbonic anhydrase 1                                    | P00915                       | 759                    | CA1           |
| Aminoacylase-1                                                                                          | 4.223    | 2.73E-05       | 0.0064       | -0.697   | 0.006852       | Aminoacylase-1                                          | Q03154                       | 95                     | ACY1          |
| Growth hormone receptor                                                                                 | 4.185    | 3.21E-05       | 0.0039       | -0.854   | 0.006852       | Growth hormone receptor                                 | P10912                       | 2690                   | GHR           |
| IL-18 Ra                                                                                                | 4.152    | 3.70E-05       | 0.0019       | -0.988   | 0.006852       | Interleukin-18 receptor 1                               | Q13478                       | 8809                   | IL18R1        |
| LG3BP                                                                                                   | 4.079    | 5.03E-05       | 0.0046       | -1.281   | 0.008161       | Galectin-3-binding protein                              | Q08380                       | 3959                   | LGALS3BP      |
| UNC5H4                                                                                                  | -4.025   | 6.32E-05       | -0.0032      | -1.497   | 0.009105       | Netrin receptor UNC5D                                   | Q6UXZ4                       | 137970                 | UNC5D         |
| TFPI                                                                                                    | 3.973    | 7.83E-05       | 0.0030       | -1.700   | 0.010152       | Tissue factor pathway inhibitor                         | P10646                       | 7035                   | TFPI          |
| Factor H                                                                                                | 3.894    | 0.00011        | 0.0019       | -2.006   | 0.012501       | Complement factor H                                     | P08603                       | 3075                   | CFH           |
| NRX1B                                                                                                   | -3.877   | 0.00012        | -0.0034      | -2.069   | 0.012501       | Neurexin-1-beta                                         | P58400                       | 9378                   | NRXN1         |
| MBD4                                                                                                    | -3.836   | 0.00014        | -0.0024      | -2.225   | 0.013609       | Methyl-CpG-binding domain protein 4                     | O95243                       | 8930                   | MBD4          |
| Coagulation Factor IXab                                                                                 | 3.799    | 0.00016        | 0.0029       | -2.363   | 0.014262       | Coagulation factor IXab                                 | P00740                       | 2158                   | F9            |
| Factor I                                                                                                | 3.785    | 0.00017        | 0.0017       | -2.417   | 0.014262       | Complement factor I                                     | P05156                       | 3426                   | CFI           |
| PDE11                                                                                                   | 3.768    | 0.00018        | 0.0021       | -2.478   | 0.014262       | Dual 3',5'-cyclic-AMP and -GMP phosphodiesterase 11A    | Q9HCR9                       | 50940                  | PDE11A        |
| DHH                                                                                                     | -3.756   | 0.00019        | -0.0036      | -2.522   | 0.014262       | Desert hedgehog protein N-product                       | O43323                       | 50846                  | DHH           |
| Integrin a1b1                                                                                           | 3.739    | 0.00020        | 0.0039       | -2.584   | 0.014383       | Integrin alpha-I: beta-1 complex                        | P56199,<br>P05556            | 3672<br>3688           | ITGA1         |
| LYVE1                                                                                                   | -3.702   | 0.00023        | -0.0031      | -2.721   | 0.015106       | Lymphatic vessel endothelial hyaluronic acid receptor 1 | Q9Y5Y7                       | 10894                  | LYVE1         |
| Coagulation Factor IX                                                                                   | 3.698    | 0.00023        | 0.0024       | -2.736   | 0.015106       | Coagulation factor IX                                   | P00740                       | 2158                   | F9            |

Table S2

| vars                           | t      | P.Value | logFC   | B      | 5%FDR P  | TargetFullName                                       | UniProt           | EntrezID     | Symbol  |
|--------------------------------|--------|---------|---------|--------|----------|------------------------------------------------------|-------------------|--------------|---------|
| GDF2                           | -3.677 | 0.00025 | -0.0042 | -2.810 | 0.015106 | Growth/differentiation factor 2                      | Q9UK05            | 2658         | GDF2    |
| Endothelin-converting enzyme 1 | 3.671  | 0.00026 | 0.0018  | -2.833 | 0.015106 | Endothelin-converting enzyme 1                       | P42892            | 1889         | ECE1    |
| suPAR                          | 3.662  | 0.00027 | 0.0019  | -2.864 | 0.015106 | Urokinase plasminogen activator surface receptor     | Q03405            | 5329         | PLAUR   |
| S100A4                         | -3.652 | 0.00028 | -0.0053 | -2.901 | 0.015106 | Protein S100-A4                                      | P26447            | 6275         | S100A4  |
| SAP                            | 3.602  | 0.00034 | 0.0024  | -3.079 | 0.017541 | Serum amyloid P-component                            | P02743            | 325          | APCS    |
| IFN-lambda 1                   | -3.571 | 0.00038 | -0.0023 | -3.188 | 0.018453 | Interferon lambda-1                                  | Q8IU54            | 282618       | IFNL1   |
| MCP-4                          | -3.567 | 0.00039 | -0.0035 | -3.204 | 0.018453 | C-C motif chemokine 13                               | Q99616            | 6357         | CCL13   |
| CD70                           | 3.558  | 0.00040 | 0.0034  | -3.233 | 0.018453 | CD70 antigen                                         | P32970            | 970          | CD70    |
| PLPP                           | -3.524 | 0.00045 | -0.0045 | -3.354 | 0.020282 | Pyridoxal phosphate phosphatase                      | Q96GD0            | 57026        | PDXP    |
| Peroxiredoxin-6                | -3.474 | 0.00054 | -0.0068 | -3.525 | 0.023489 | Peroxiredoxin-6                                      | P30041            | 9588         | PRDX6   |
| Calcineurin                    | 3.455  | 0.00058 | 0.0028  | -3.588 | 0.023489 | Calcineurin                                          | Q08209<br>P63098  | 5530<br>5534 | PPP3CA  |
| NACA                           | -3.454 | 0.00059 | -0.0053 | -3.594 | 0.023489 | Nascent polypeptide-associated complex subunit alpha | Q13765            | 4666         | NACA    |
| Coagulation Factor Xa          | 3.445  | 0.00061 | 0.0022  | -3.624 | 0.023489 | Coagulation factor Xa                                | P00742            | 2159         | F10     |
| NOTC2                          | 3.440  | 0.00062 | 0.0049  | -3.640 | 0.023489 | Neurogenic locus notch homolog protein 2             | Q04721            | 4853         | NOTCH2  |
| a-Synuclein                    | -3.429 | 0.00064 | -0.0069 | -3.678 | 0.023766 | Alpha-synuclein                                      | P37840            | 6622         | SNCA    |
| IL-13 Ra1                      | 3.413  | 0.00068 | 0.0016  | -3.732 | 0.024457 | Interleukin-13 receptor subunit alpha-1              | P78552            | 3597         | IL13RA1 |
| C5b, 6 Complex                 | 3.405  | 0.00070 | 0.0019  | -3.760 | 0.024457 | Complement C5b-C6 complex                            | P01031,P<br>13671 | 727 729      | C5      |
| CD39                           | 3.398  | 0.00072 | 0.0015  | -3.781 | 0.024457 | Ectonucleoside triphosphate diphosphohydrolase 1     | P49961            | 953          | ENTPD1  |
| CK2-A1:B                       | -3.375 | 0.00078 | -0.0056 | -3.858 | 0.025890 | Casein kinase II 2-alpha:2-beta heterotetramer       | P68400<br>P67870  | 1457<br>1460 | CSNK2A1 |
| IFN10                          | 3.366  | 0.00080 | 0.0040  | -3.888 | 0.026060 | Interferon alpha-10                                  | P01566            | 3446         | IFNA10  |

Table S2

| vars                         | t      | P.Value | logFC   | B      | 5%FDR P  | TargetFullName                                                      | UniProt | EntrezID | Symbol    |
|------------------------------|--------|---------|---------|--------|----------|---------------------------------------------------------------------|---------|----------|-----------|
| Myokinase, human             | -3.341 | 0.00088 | -0.0076 | -3.970 | 0.027207 | Adenylate kinase isoenzyme 1                                        | P00568  | 203      | AK1       |
| 41                           | -3.340 | 0.00088 | -0.0078 | -3.973 | 0.027207 | Protein 4.1                                                         | P11171  | 2035     | EPB41     |
| NADPH-P450<br>Oxidoreductase | 3.325  | 0.00093 | 0.0043  | -4.023 | 0.028046 | NADPH--cytochrome P450<br>reductase                                 | P16435  | 5447     | POR       |
| PAFAH beta subunit           | -3.306 | 0.00099 | -0.0035 | -4.085 | 0.029296 | Platelet-activating factor<br>acetylhydrolase IB subunit<br>beta    | P68402  | 5049     | PAFAH1B2  |
| Heparin cofactor II          | 3.289  | 0.00106 | 0.0023  | -4.142 | 0.030463 | Heparin cofactor 2                                                  | P05546  | 3053     | SERPIND1  |
| HINT1                        | -3.279 | 0.00109 | -0.0036 | -4.173 | 0.030809 | Histidine triad nucleotide-<br>binding protein 1                    | P49773  | 3094     | HINT1     |
| TRAIL R1                     | -3.241 | 0.00125 | -0.0041 | -4.297 | 0.034453 | Tumor necrosis factor<br>receptor superfamily member<br>10A         | O00220  | 8797     | TNFRSF10A |
| KIF23                        | -3.227 | 0.00131 | -0.0038 | -4.339 | 0.035327 | Kinesin-like protein KIF23                                          | Q02241  | 9493     | KIF23     |
| FCN1                         | 3.218  | 0.00135 | 0.0026  | -4.368 | 0.035715 | Ficolin-1                                                           | O00602  | 2219     | FCN1      |
| eIF-5                        | -3.197 | 0.00145 | -0.0031 | -4.436 | 0.036988 | Eukaryotic translation<br>initiation factor 5                       | P55010  | 1983     | EIF5      |
| IL-34                        | 3.196  | 0.00145 | 0.0026  | -4.438 | 0.036988 | Interleukin-34                                                      | Q6ZMJ4  | 146433   | IL34      |
| AN32B                        | 3.180  | 0.00154 | 0.0034  | -4.490 | 0.038388 | Acidic leucine-rich nuclear<br>phosphoprotein 32 family<br>member B | Q92688  | 10541    | ANP32B    |
| Lymphotactin                 | -3.160 | 0.00164 | -0.0022 | -4.551 | 0.039717 | Lymphotactin                                                        | P47992  | 6375     | XCL1      |
| B7                           | 3.158  | 0.00166 | 0.0013  | -4.559 | 0.039717 | T-lymphocyte activation<br>antigen CD80                             | P33681  | 941      | CD80      |
| cGMP-stimulated PDE          | -3.153 | 0.00168 | -0.0064 | -4.573 | 0.039717 | cGMP-dependent 3',5'-cyclic<br>phosphodiesterase                    | O00408  | 5138     | PDE2A     |
| Myoglobin                    | 3.116  | 0.00191 | 0.0025  | -4.687 | 0.043108 | Myoglobin                                                           | P02144  | 4151     | MB        |
| BMP-1                        | 3.115  | 0.00191 | 0.0029  | -4.691 | 0.043108 | Bone morphogenetic protein<br>1                                     | P13497  | 649      | BMP1      |
| MED-1                        | 3.113  | 0.00193 | 0.0018  | -4.697 | 0.043108 | Mediator of RNA polymerase II<br>transcription subunit 1            | Q15648  | 5469     | MED1      |
| CRTAM                        | -3.101 | 0.00201 | -0.0032 | -4.735 | 0.044142 | Cytotoxic and regulatory T-cell<br>molecule                         | O95727  | 56253    | CRTAM     |



Table S2

| <b>vars</b>     | <b>t</b> | <b>P.Value</b> | <b>logFC</b> | <b>B</b> | <b>5%FDR P</b> | <b>TargetFullName</b>                 | <b>UniProt</b> | <b>EntrezID</b> | <b>Symbol</b> |
|-----------------|----------|----------------|--------------|----------|----------------|---------------------------------------|----------------|-----------------|---------------|
| Peroxiredoxin-1 | -3.090   | 0.00208        | -0.0035      | -4.769   | 0.045034       | Peroxiredoxin-1                       | Q06830         | 5052            | PRDX1         |
| BAD             | -3.068   | 0.00224        | -0.0043      | -4.835   | 0.047599       | Bcl2-associated agonist of cell death | Q92934         | 572             | BAD           |
| IL-16           | 3.063    | 0.00228        | 0.0010       | -4.850   | 0.047628       | Interleukin-16                        | Q14005         | 3603            | IL16          |
| Myostatin       | -3.051   | 0.00237        | -0.0062      | -4.886   | 0.047929       | Growth/differentiation factor 8       | O14793         | 2660            | MSTN          |
| IMB1            | -3.048   | 0.00239        | -0.0056      | -4.895   | 0.047929       | Importin subunit beta-1               | Q14974         | 3837            | KPNB1         |
| PSA6            | -3.047   | 0.00240        | -0.0021      | -4.899   | 0.047929       | Proteasome subunit alpha type-6       | P60900         | 5687            | PSMA6         |

Table S3

| <b>Table S3: List of association of protein variables with Moderate to Severe Index (AHI &gt;= 15) compared to mild/controls ( AHI &lt;15).</b> |          |                |              |          |                |                                                  |                  |                 |                  |
|-------------------------------------------------------------------------------------------------------------------------------------------------|----------|----------------|--------------|----------|----------------|--------------------------------------------------|------------------|-----------------|------------------|
| <b>vars</b>                                                                                                                                     | <b>t</b> | <b>P.Value</b> | <b>logFC</b> | <b>B</b> | <b>5%FDR P</b> | <b>TargetFullName</b>                            | <b>UniProt</b>   | <b>EntrezID</b> | <b>Symbol</b>    |
| Factor I                                                                                                                                        | 4.161    | 3.57E-05       | 0.0473       | 1.985    | 0.036          | Complement factor I                              | P05156           | 3426            | CFI              |
| Calcineurin                                                                                                                                     | 4.056    | 5.56E-05       | 0.0844       | 1.578    | 0.036          | Calcineurin                                      | Q08209<br>P63098 | 5530 5534       | PPP3CA<br>PPP3R1 |
| SOST                                                                                                                                            | -3.747   | 0.00019        | -0.1032      | 0.441    | 0.049          | Sclerostin                                       | Q9BQB4           | 50964           | SOST             |
| NRX1B                                                                                                                                           | -3.720   | 0.00021        | -0.0854      | 0.345    | 0.049          | Neurexin-1-beta                                  | P58400           | 9378            | NRXN1            |
| GDF2                                                                                                                                            | -3.718   | 0.00022        | -0.1108      | 0.336    | 0.049          | Growth/differentiation factor 2                  | Q9UK05           | 2658            | GDF2             |
| Lymphotactin                                                                                                                                    | -3.676   | 0.00025        | -0.0665      | 0.189    | 0.049          | Lymphotactin                                     | P47992           | 6375            | XCL1             |
| Carbonic anhydrase I                                                                                                                            | -3.611   | 0.00033        | -0.232       | -0.036   | 0.049          | Carbonic anhydrase 1                             | P00915           | 759             | CA1              |
| CRTAM                                                                                                                                           | -3.609   | 0.00033        | -0.097       | -0.042   | 0.049          | Cytotoxic and regulatory T-cell molecule         | O95727           | 56253           | CRTAM            |
| suPAR                                                                                                                                           | 3.600    | 0.00034        | 0.0494       | -0.073   | 0.049          | Urokinase plasminogen activator surface receptor | Q03405           | 5329            | PLAUR            |

Table S4

| <b>Table S4: List of association of protein variables Severe Index (AHI &gt;= 30) compared to controls ( AHI &lt; 5).</b> |          |                |              |          |                |                                   |                              |                     |                         |
|---------------------------------------------------------------------------------------------------------------------------|----------|----------------|--------------|----------|----------------|-----------------------------------|------------------------------|---------------------|-------------------------|
| <b>vars</b>                                                                                                               | <b>t</b> | <b>P.Value</b> | <b>logFC</b> | <b>B</b> | <b>5%FDR P</b> | <b>TargetFullName</b>             | <b>UniProt</b>               | <b>GeneID</b>       | <b>Symbol</b>           |
| Carbonic anhydrase I                                                                                                      | -4.107   | 5.1E-05        | -0.431       | 1.726    | 0.039          | Carbonic anhydrase 1              | P00915                       | 759                 | CA1                     |
| Factor I                                                                                                                  | 4.068    | 6.0E-05        | 0.071        | 1.584    | 0.039          | Complement factor I               | P05156                       | 3426                | CFI                     |
| UNC5H4                                                                                                                    | -3.869   | 1.3E-04        | -0.135       | 0.887    | 0.055          | Netrin receptor UNC5D             | Q6UXZ4                       | 137970              | UNC5D                   |
| Laminin                                                                                                                   | 3.753    | 2.1E-04        | 0.108        | 0.491    | 0.055          | Laminin                           | P25391,<br>P07942,<br>P11047 | 284217<br>3912 3915 | LAMA1<br>LAMB1<br>LAMC1 |
| tPA                                                                                                                       | 3.728    | 2.3E-04        | 0.129        | 0.409    | 0.055          | Tissue-type plasminogen activator | P00750                       | 5327                | PLAT                    |
| Aminoacylase-1                                                                                                            | 3.701    | 2.5E-04        | 0.248        | 0.320    | 0.055          | Aminoacylase-1                    | Q03154                       | 95                  | ACY1                    |

Table S5

| <b>Table S5: List of association of protein variables with Moderate apnea (OAH1 &gt;= 15 &amp; OAH1 &lt; 30 ) compared to controls ( AHI &lt;= 5).</b> |        |         |        |        |         |                                                          |                  |           |                  |
|--------------------------------------------------------------------------------------------------------------------------------------------------------|--------|---------|--------|--------|---------|----------------------------------------------------------|------------------|-----------|------------------|
| vars                                                                                                                                                   | t      | P.Value | logFC  | B      | 5%FDR P | TargetFullName                                           | UniProt          | GeneID    | Symbol           |
| UNC5H4                                                                                                                                                 | -3.412 | 0.001   | -0.103 | -0.587 | 0.449   | Netrin receptor UNC5D                                    | Q6UXZ4           | 137970    | UNC5D            |
| Factor I                                                                                                                                               | 3.334  | 0.001   | 0.057  | -0.821 | 0.449   | Complement factor I                                      | P05156           | 3426      | CFI              |
| PPAC                                                                                                                                                   | -3.282 | 0.001   | -0.275 | -0.974 | 0.449   | Low molecular weight phosphotyrosine protein phosphatase | P24666           | 52        | ACP1             |
| Carbonic anhydrase I                                                                                                                                   | -3.225 | 0.001   | -0.321 | -1.139 | 0.449   | Carbonic anhydrase 1                                     | P00915           | 759       | CA1              |
| PUR8                                                                                                                                                   | -3.051 | 0.002   | -0.233 | -1.629 | 0.513   | Adenylosuccinate lyase                                   | P30566           | 158       | ADSL             |
| eIF-5                                                                                                                                                  | -3.013 | 0.003   | -0.119 | -1.732 | 0.513   | Eukaryotic translation initiation factor 5               | P55010           | 1983      | EIF5             |
| PSA                                                                                                                                                    | -2.983 | 0.003   | -0.126 | -1.814 | 0.513   | Prostate-specific antigen                                | P07288           | 354       | KLK3             |
| Heparin cofactor II                                                                                                                                    | 2.917  | 0.004   | 0.077  | -1.987 | 0.513   | Heparin cofactor 2                                       | P05546           | 3053      | SERPIND1         |
| Myokinase, human                                                                                                                                       | -2.911 | 0.004   | -0.272 | -2.005 | 0.513   | Adenylate kinase isoenzyme 1                             | P00568           | 203       | AK1              |
| Eotaxin-3                                                                                                                                              | -2.902 | 0.004   | -0.118 | -2.027 | 0.513   | C-C motif chemokine 26                                   | Q9Y258           | 10344     | CCL26            |
| bFGF                                                                                                                                                   | -2.763 | 0.006   | -0.234 | -2.382 | 0.616   | Fibroblast growth factor 2                               | P09038           | 2247      | FGF2             |
| Calcineurin                                                                                                                                            | 2.703  | 0.007   | 0.071  | -2.530 | 0.616   | Calcineurin                                              | Q08209<br>P63098 | 5530 5534 | PPP3CA<br>PPP3R1 |
| sE-Selectin                                                                                                                                            | 2.682  | 0.008   | 0.125  | -2.580 | 0.616   | E-selectin                                               | P16581           | 6401      | SELE             |
| C5a                                                                                                                                                    | 2.648  | 0.008   | 0.117  | -2.662 | 0.616   | C5a anaphylatoxin                                        | P01031           | 727       | C5               |
| S100A4                                                                                                                                                 | -2.636 | 0.009   | -0.156 | -2.690 | 0.616   | Protein S100-A4                                          | P26447           | 6275      | S100A4           |
| HSP 27                                                                                                                                                 | -2.635 | 0.009   | -0.135 | -2.693 | 0.616   | Heat shock protein beta-1                                | P04792           | 3315      | HSPB1            |
| UBE2N                                                                                                                                                  | -2.628 | 0.009   | -0.193 | -2.710 | 0.616   | Ubiquitin-conjugating enzyme E2 N                        | P61088           | 7334      | UBE2N            |
| CSF-1                                                                                                                                                  | -2.598 | 0.010   | -0.067 | -2.781 | 0.616   | Macrophage colony-stimulating factor 1                   | P09603           | 1435      | CSF1             |

Table S6

| <b>Table S6: List of association of protein variables with Mild Apnea index (OAHI &gt; 5 &amp; OAHI &lt; 15 ) compared to controls ( OAHI &lt;= 5).OAHI - Obstructive apnea hypopnea index</b> |          |                |              |          |                |                                                                  |                   |               |               |
|------------------------------------------------------------------------------------------------------------------------------------------------------------------------------------------------|----------|----------------|--------------|----------|----------------|------------------------------------------------------------------|-------------------|---------------|---------------|
| <b>vars</b>                                                                                                                                                                                    | <b>t</b> | <b>P.Value</b> | <b>logFC</b> | <b>B</b> | <b>5%FDR P</b> | <b>TargetFullName</b>                                            | <b>UniProt</b>    | <b>GeneID</b> | <b>Symbol</b> |
| MMP-13                                                                                                                                                                                         | -3.058   | 0.002          | -0.101       | -1.681   | 0.973          | Collagenase 3                                                    | P45452            | 4322          | MMP13         |
| MP2K3                                                                                                                                                                                          | -2.883   | 0.004          | -0.054       | -2.162   | 0.973          | Dual specificity mitogen-activated protein kinase kinase 3       | P46734            | 5606          | MAP2K3        |
| IL-1 R AcP                                                                                                                                                                                     | -2.818   | 0.005          | -0.098       | -2.335   | 0.973          | Interleukin-1 Receptor accessory protein                         | Q9NPH3            | 3556          | IL1RAP        |
| PPAC                                                                                                                                                                                           | -2.767   | 0.006          | -0.190       | -2.467   | 0.973          | Low molecular weight phosphotyrosine protein phosphatase         | P24666            | 52            | ACP1          |
| Integrin a1b1                                                                                                                                                                                  | 2.733    | 0.007          | 0.094        | -2.554   | 0.973          | Integrin alpha-I: beta-1 complex                                 | P56199,<br>P05556 | 3672 3688     | ITGA1 ITGB1   |
| ART                                                                                                                                                                                            | -2.665   | 0.008          | -0.092       | -2.723   | 0.973          | Agouti-related protein                                           | O00253            | 181           | AGRP          |
| UCRP                                                                                                                                                                                           | -2.600   | 0.010          | -0.117       | -2.884   | 0.973          | Ubiquitin-like protein ISG15                                     | P05161            | 9636          | ISG15         |
| Carbonic anhydrase I                                                                                                                                                                           | -2.559   | 0.011          | -0.209       | -2.982   | 0.973          | Carbonic anhydrase 1                                             | P00915            | 759           | CA1           |
| ADAMTS-5                                                                                                                                                                                       | 2.543    | 0.011          | 0.036        | -3.021   | 0.973          | A disintegrin and metalloproteinase with thrombospondin motifs 5 | Q9UNA0            | 11096         | ADAMTS5       |
| aldolase A                                                                                                                                                                                     | -2.523   | 0.012          | -0.066       | -3.067   | 0.973          | Fructose-bisphosphate aldolase A                                 | P04075            | 226           | ALDOA         |
| bFGF                                                                                                                                                                                           | -2.448   | 0.015          | -0.195       | -3.240   | 0.973          | Fibroblast growth factor 2                                       | P09038            | 2247          | FGF2          |
| Nr-CAM                                                                                                                                                                                         | -2.427   | 0.016          | -0.071       | -3.288   | 0.973          | Neuronal cell adhesion molecule                                  | Q92823            | 4897          | NRCAM         |
| Eotaxin-3                                                                                                                                                                                      | -2.355   | 0.019          | -0.073       | -3.450   | 0.973          | C-C motif chemokine 26                                           | Q9Y258            | 10344         | CCL26         |
| RGM-C                                                                                                                                                                                          | 2.315    | 0.021          | 0.054        | -3.536   | 0.973          | Hemojuvelin                                                      | Q6ZVN8            | 148738        | HFE2          |
| ERAB                                                                                                                                                                                           | 2.288    | 0.023          | 0.053        | -3.594   | 0.973          | 3-hydroxyacyl-CoA dehydrogenase type-2                           | Q99714            | 3028          | HSD17B10      |
| LEG9                                                                                                                                                                                           | -2.285   | 0.023          | -0.063       | -3.601   | 0.973          | Galectin-9                                                       | O00182            | 3965          | LGALS9        |
| LRRT3                                                                                                                                                                                          | 2.272    | 0.024          | 0.047        | -3.628   | 0.973          | Leucine-rich repeat transmembrane neuronal protein 3             | Q86VH5            | 347731        | LRRTM3        |
| sRANKL                                                                                                                                                                                         | -2.271   | 0.024          | -0.068       | -3.631   | 0.973          | Tumor necrosis factor ligand superfamily member 11               | O14788            | 8600          | TNFSF11       |

Table S7

**Table S7: pathway analysis of top protein variables (5% FDR significant) associated with apnea index (modelled as continuous variable)**

| Category | ID      | Name                                                                                                                      | Source                          | p-value | q-value<br>FDR B&H | Hit<br>Count | Hit Count<br>in<br>Genome | Hit in Query List                                                                                                     |
|----------|---------|---------------------------------------------------------------------------------------------------------------------------|---------------------------------|---------|--------------------|--------------|---------------------------|-----------------------------------------------------------------------------------------------------------------------|
| Pathway  | 83073   | Complement and coagulation cascades                                                                                       | BioSystems:<br>KEGG             | 3E-11   | 2.55E-08           | 10           | 79                        | CFH,PLAT,PLAUR,C5,C6,CFI,SERPIND1,F9,F10,TFPI                                                                         |
| Pathway  | 1270323 | L1CAM interactions                                                                                                        | BioSystems:<br>REACTOME         | 1E-07   | 6.22E-05           | 8            | 102                       | RPS6KA5,CSNK2A1,CSNK2B,LAMA1,LAMB1,LAMC1,ITGA1,ITGB1                                                                  |
| Pathway  | 1270253 | Laminin interactions                                                                                                      | BioSystems:<br>REACTOME         | 3E-07   | 0.000067           | 5            | 25                        | LAMA1,LAMB1,LAMC1,ITGA1,ITGB1                                                                                         |
| Pathway  | M5889   | Ensemble of genes encoding extracellular matrix and extracellular matrix-associated proteins                              | MSigDB C2<br>BIOCARTA<br>(v6.0) | 3E-07   | 0.000067           | 21           | 1028                      | S100A4,IL34,BMP1,IL16,IGFBP1,DHH,FCN1,LAMA1,LAMB1,LAMC1,PLAT,CCL13,GDF2,MSTN,PLXNB2,XCL1,SERPIND1,F9,F10,IFNA10,FGF16 |
| Pathway  | M5885   | Ensemble of genes encoding ECM-associated proteins including ECM-affiliated proteins, ECM regulators and secreted factors | MSigDB C2<br>BIOCARTA<br>(v6.0) | 1E-06   | 0.00024            | 17           | 753                       | S100A4,IL34,BMP1,IL16,DHH,FCN1,PLAT,CCL13,GDF2,MSTN,PLXNB2,XCL1,SERPIND1,F9,F10,IFNA10,FGF16                          |
| Pathway  | 1269369 | Extrinsic Pathway of Fibrin Clot Formation                                                                                | BioSystems:<br>REACTOME         | 2E-06   | 0.000279           | 3            | 5                         | F9,F10,TFPI                                                                                                           |
| Pathway  | P00011  | Blood coagulation                                                                                                         | PantherDB                       | 4E-06   | 0.000433           | 5            | 40                        | PLAT,PLAUR,F9,F10,TFPI                                                                                                |
| Pathway  | 1269340 | Hemostasis                                                                                                                | BioSystems:<br>REACTOME         | 4E-06   | 0.000443           | 15           | 640                       | PDE2A,KIF23,PLAT,PLAUR,PLCG1,ITGA1,TNFRSF10A,ITGB1,SERPIND1,F9,F10,IFNA10,LGALS3BP,TFPI,PDE11A                        |
| Pathway  | 1457800 | MET activates PTK2 signaling                                                                                              | BioSystems:<br>REACTOME         | 5E-06   | 0.000483           | 4            | 20                        | LAMA1,LAMB1,LAMC1,ITGB1                                                                                               |
| Pathway  | 1270254 | Non-integrin membrane-ECM interactions                                                                                    | BioSystems:<br>REACTOME         | 7E-06   | 0.000615           | 5            | 46                        | NRXN1,LAMA1,LAMB1,LAMC1,ITGB1                                                                                         |
| Pathway  | 1269241 | Complement cascade                                                                                                        | BioSystems:<br>REACTOME         | 2E-05   | 0.001242           | 5            | 54                        | CFH,FCN1,C5,C6,CFI                                                                                                    |
| Pathway  | 1269250 | Regulation of Complement cascade                                                                                          | BioSystems:<br>REACTOME         | 2E-05   | 0.001271           | 4            | 27                        | CFH,C5,C6,CFI                                                                                                         |

Table S7

| Category | ID        | Name                                                              | Source                          | p-value | q-value<br>FDR B&H | Hit<br>Count | Hit Count<br>in<br>Genome | Hit in Query List                                                                                                  |
|----------|-----------|-------------------------------------------------------------------|---------------------------------|---------|--------------------|--------------|---------------------------|--------------------------------------------------------------------------------------------------------------------|
| Pathway  | 83051     | Cytokine-cytokine receptor interaction                            | BioSystems:<br>KEGG             | 3E-05   | 0.0018             | 9            | 270                       | GHR,IL13RA1,CD70,CCL13,TNFRSF10A,XCL1,IL18R1,IFNA10,IFNL1                                                          |
| Pathway  | 1457799   | MET promotes cell motility                                        | BioSystems:<br>REACTOME         | 3E-05   | 0.0018             | 4            | 31                        | LAMA1,LAMB1,LAMC1,ITGB1                                                                                            |
| Pathway  | M5883     | Genes encoding secreted soluble factors                           | MSigDB C2<br>BIOCARTA<br>(v6.0) | 3E-05   | 0.0018             | 10           | 344                       | S100A4,IL34,IL16,DHH,CCL13,GDF2,MSTN,XCL1,IFNA10,FGF16                                                             |
| Pathway  | 1269310   | Cytokine Signaling in Immune system                               | BioSystems:<br>REACTOME         | 3E-05   | 0.0018             | 15           | 763                       | GHR,IL34,IL13RA1,IL16,UBE2N,CD80,PSMA6,CD70,PLCG1,ITGB1,IL18R1,IFNA10,FGF16,KPNB1,IFNL1                            |
| Pathway  | 1269203   | Innate Immune System                                              | BioSystems:<br>REACTOME         | 5E-05   | 0.002705           | 20           | 1312                      | CFH,PPP3CA,PPP3R1,RPS6KA5,UBE2N,FCN1,CD80,CSNK2B,PSMA6,PAFAH1B2,BAD,PLAUR,C5,PLCG1,C6,CFI,PRDX6,IFNA10,FGF16,KPNB1 |
| Pathway  | 1269368   | Formation of Fibrin Clot (Clotting Cascade)                       | BioSystems:<br>REACTOME         | 8E-05   | 0.003762           | 4            | 39                        | SERPIND1,F9,F10,TFPI                                                                                               |
| Pathway  | 1270303   | Axon guidance                                                     | BioSystems:<br>REACTOME         | 9E-05   | 0.004147           | 12           | 554                       | RPS6KA5,CSNK2A1,CSNK2B,PSMA6,LAMA1,LAMB1,LAMC1,PLCG1,ITGA1,ITGB1,UNC5D,FGF16                                       |
| Pathway  | 83068     | ECM-receptor interaction                                          | BioSystems:<br>KEGG             | 0.0001  | 0.005152           | 5            | 82                        | LAMA1,LAMB1,LAMC1,ITGA1,ITGB1                                                                                      |
| Pathway  | M3952     | Cells and Molecules involved in local acute inflammatory response | MSigDB C2<br>BIOCARTA<br>(v6.0) | 0.0001  | 0.005152           | 3            | 17                        | C5,C6,ITGB1                                                                                                        |
| Pathway  | 692234    | PI3K-Akt signaling pathway                                        | BioSystems:<br>KEGG             | 0.0002  | 0.007002           | 9            | 342                       | GHR,BAD,LAMA1,LAMB1,LAMC1,ITGA1,ITGB1,IFNA10,FGF16                                                                 |
| Pathway  | W:0000295 | altered integrin signaling                                        | Pathway<br>Ontology             | 0.0002  | 0.007461           | 2            | 4                         | ITGA1,ITGB1                                                                                                        |

Table S7

| Category | ID      | Name                                       | Source                          | p-value | q-value<br>FDR B&H | Hit<br>Count | Hit Count<br>in<br>Genome | Hit in Query List                                               |
|----------|---------|--------------------------------------------|---------------------------------|---------|--------------------|--------------|---------------------------|-----------------------------------------------------------------|
| Pathway  | M15394  | Acute Myocardial Infarction                | MSigDB C2<br>BIOCARTA<br>(v6.0) | 0.0002  | 0.007461           | 3            | 20                        | PLAT,F10,TFPI                                                   |
| Pathway  | 1270326 | Signal transduction by L1                  | BioSystems:<br>REACTOME         | 0.0002  | 0.008001           | 3            | 21                        | CSNK2A1,CSNK2B,ITGB1                                            |
| Pathway  | M15926  | Trefoil Factors Initiate Mucosal Healing   | MSigDB C2<br>BIOCARTA<br>(v6.0) | 0.0002  | 0.008001           | 3            | 21                        | GHR,BAD,ITGB1                                                   |
| Pathway  | 1269370 | Intrinsic Pathway of Fibrin Clot Formation | BioSystems:<br>REACTOME         | 0.0003  | 0.008883           | 3            | 22                        | SERPIND1,F9,F10                                                 |
| Pathway  | 1270256 | ECM proteoglycans                          | BioSystems:<br>REACTOME         | 0.0004  | 0.01071            | 4            | 57                        | LAMA1,LAMB1,LAMC1,ITGB1                                         |
| Pathway  | 83066   | VEGF signaling pathway                     | BioSystems:<br>KEGG             | 0.0004  | 0.01181            | 4            | 59                        | PPP3CA,PPP3R1,BAD,PLCG1                                         |
| Pathway  | 169642  | Toxoplasmosis                              | BioSystems:<br>KEGG             | 0.0006  | 0.01541            | 5            | 113                       | BAD,LAMA1,LAMB1,LAMC1,ITGB1                                     |
| Pathway  | 1270262 | Apoptosis                                  | BioSystems:<br>REACTOME         | 0.0006  | 0.01557            | 6            | 174                       | BMX,PPP3R1,PSMA6,BAD,TNFRSF1<br>0A,KPNB1                        |
| Pathway  | 83065   | Axon guidance                              | BioSystems:<br>KEGG             | 0.0006  | 0.01557            | 6            | 175                       | PPP3CA,PPP3R1,PLCG1,PLXNB2,IT<br>GB1,UNC5D                      |
| Pathway  | 1270261 | Programmed Cell Death                      | BioSystems:<br>REACTOME         | 0.0006  | 0.01603            | 6            | 177                       | BMX,PPP3R1,PSMA6,BAD,TNFRSF1<br>0A,KPNB1                        |
| Pathway  | 1457794 | Signaling by MET                           | BioSystems:<br>REACTOME         | 0.0007  | 0.0183             | 4            | 69                        | LAMA1,LAMB1,LAMC1,ITGB1                                         |
| Pathway  | 1269318 | Signaling by Interleukins                  | BioSystems:<br>REACTOME         | 0.0011  | 0.0238             | 10           | 531                       | IL34,IL13RA1,IL16,UBE2N,CD80,PS<br>MA6,ITGB1,IL18R1,FGF16,IFNL1 |
| Pathway  | 101144  | Prion diseases                             | BioSystems:<br>KEGG             | 0.0012  | 0.0238             | 3            | 35                        | LAMC1,C5,C6                                                     |
| Pathway  | 83079   | Natural killer cell mediated cytotoxicity  | BioSystems:<br>KEGG             | 0.0012  | 0.0238             | 5            | 133                       | PPP3CA,PPP3R1,PLCG1,TNFRSF10<br>A,IFNA10                        |



Table S7

| Category | ID        | Name                                                                                                     | Source                          | p-value | q-value<br>FDR B&H | Hit<br>Count | Hit Count<br>in<br>Genome | Hit in Query List                 |
|----------|-----------|----------------------------------------------------------------------------------------------------------|---------------------------------|---------|--------------------|--------------|---------------------------|-----------------------------------|
| Pathway  | 83067     | Focal adhesion                                                                                           | BioSystems:<br>KEGG             | 0.0012  | 0.0238             | 6            | 199                       | BAD,LAMA1,LAMB1,LAMC1,ITGA1,ITGB1 |
| Pathway  | 1268705   | Transport of gamma-carboxylated protein precursors from the endoplasmic reticulum to the Golgi apparatus | BioSystems:<br>REACTOME         | 0.0012  | 0.0238             | 2            | 9                         | F9,F10                            |
| Pathway  | 1270327   | CHL1 interactions                                                                                        | BioSystems:<br>REACTOME         | 0.0012  | 0.0238             | 2            | 9                         | ITGA1,ITGB1                       |
| Pathway  | W:0000315 | calcineurin signaling                                                                                    | Pathway<br>Ontology             | 0.0012  | 0.0238             | 2            | 9                         | PPP3CA,PPP3R1                     |
| Pathway  | 1269249   | Terminal pathway of complement                                                                           | BioSystems:<br>REACTOME         | 0.0012  | 0.0238             | 2            | 9                         | C5,C6                             |
| Pathway  | W:0000474 | coagulation cascade                                                                                      | Pathway<br>Ontology             | 0.0012  | 0.0238             | 2            | 9                         | F9,F10                            |
| Pathway  | 1269300   | FCERI mediated Ca <sup>2+</sup> mobilization                                                             | BioSystems:<br>REACTOME         | 0.0013  | 0.02381            | 3            | 36                        | PPP3CA,PPP3R1,PLCG1               |
| Pathway  | 1268704   | Gamma-carboxylation of protein precursors                                                                | BioSystems:<br>REACTOME         | 0.0015  | 0.0265             | 2            | 10                        | F9,F10                            |
| Pathway  | M16334    | Eph Kinases and ephrins support platelet aggregation                                                     | MSigDB C2<br>BIOCARTA<br>(v6.0) | 0.0015  | 0.0265             | 2            | 10                        | ITGA1,ITGB1                       |
| Pathway  | 1268706   | Removal of aminoterminal propeptides from gamma-carboxylated proteins                                    | BioSystems:<br>REACTOME         | 0.0015  | 0.0265             | 2            | 10                        | F9,F10                            |
| Pathway  | 1269600   | WNT mediated activation of DVL                                                                           | BioSystems:<br>REACTOME         | 0.0015  | 0.0265             | 2            | 10                        | CSNK2A1,CSNK2B                    |
| Pathway  | 83118     | Small cell lung cancer                                                                                   | BioSystems:<br>KEGG             | 0.0016  | 0.0265             | 4            | 84                        | LAMA1,LAMB1,LAMC1,ITGB1           |
| Pathway  | M5887     | Genes encoding structural components of basement membranes                                               | MSigDB C2<br>BIOCARTA<br>(v6.0) | 0.0017  | 0.02821            | 3            | 40                        | LAMA1,LAMB1,LAMC1                 |
| Pathway  | P00049    | Parkinson disease                                                                                        | PantherDB                       | 0.0018  | 0.02821            | 4            | 87                        | CSNK2A1,CSNK2B,PSMA6,SNCA         |

Table S7

| Category | ID         | Name                                                                       | Source                          | p-value | q-value<br>FDR B&H | Hit<br>Count | Hit Count<br>in<br>Genome | Hit in Query List                                  |
|----------|------------|----------------------------------------------------------------------------|---------------------------------|---------|--------------------|--------------|---------------------------|----------------------------------------------------|
| Pathway  | 1269303    | C-type lectin receptors (CLRs)                                             | BioSystems:<br>REACTOME         | 0.0018  | 0.02821            | 5            | 147                       | PPP3CA,PPP3R1,RPS6KA5,UBE2N,<br>PSMA6              |
| Pathway  | 1269298    | Fc epsilon receptor (FCER1) signaling                                      | BioSystems:<br>REACTOME         | 0.0018  | 0.02821            | 8            | 381                       | PPP3CA,PPP3R1,UBE2N,CD80,PSM<br>A6,BAD,PLCG1,FGF16 |
| Pathway  | 1268703    | Gamma-carboxylation, transport, and<br>amino-terminal cleavage of proteins | BioSystems:<br>REACTOME         | 0.0019  | 0.02821            | 2            | 11                        | F9,F10                                             |
| Pathway  | 1269822    | Condensation of Prometaphase<br>Chromosomes                                | BioSystems:<br>REACTOME         | 0.0019  | 0.02821            | 2            | 11                        | CSNK2A1,CSNK2B                                     |
| Pathway  | 1270244    | Extracellular matrix organization                                          | BioSystems:<br>REACTOME         | 0.0019  | 0.02869            | 7            | 298                       | BMP1,NRXN1,LAMA1,LAMB1,LAMC<br>1,ITGA1,ITGB1       |
| Pathway  | PW:0000031 | purine metabolic                                                           | Pathway<br>Ontology             | 0.0021  | 0.03084            | 3            | 43                        | PDE2A,ENTPD1,AK1                                   |
| Pathway  | 1458885    | Th1 and Th2 cell differentiation                                           | BioSystems:<br>KEGG             | 0.0022  | 0.03129            | 4            | 92                        | PPP3CA,PPP3R1,PLCG1,NOTCH2                         |
| Pathway  | M4732      | Lectin Induced Complement Pathway                                          | MSigDB C2<br>BIOCARTA<br>(v6.0) | 0.0022  | 0.03144            | 2            | 12                        | C5,C6                                              |
| Pathway  | 634527     | NF-kappa B signaling pathway                                               | BioSystems:<br>KEGG             | 0.0024  | 0.03359            | 4            | 95                        | CSNK2A1,CSNK2B,CCL13,PLCG1                         |
| Pathway  | 1269415    | Phospholipase C-mediated cascade; FGFR3                                    | BioSystems:<br>REACTOME         | 0.0026  | 0.03359            | 2            | 13                        | PLCG1,FGF16                                        |
| Pathway  | M4470      | Extrinsic Prothrombin Activation Pathway                                   | MSigDB C2<br>BIOCARTA<br>(v6.0) | 0.0026  | 0.03359            | 2            | 13                        | F10,TFPI                                           |
| Pathway  | 1269372    | Dissolution of Fibrin Clot                                                 | BioSystems:<br>REACTOME         | 0.0026  | 0.03359            | 2            | 13                        | PLAT,PLAUR                                         |
| Pathway  | 1269305    | CLEC7A (Dectin-1) induces NFAT activation                                  | BioSystems:<br>REACTOME         | 0.0026  | 0.03359            | 2            | 13                        | PPP3CA,PPP3R1                                      |
| Pathway  | 1269349    | Platelet Adhesion to exposed collagen                                      | BioSystems:<br>REACTOME         | 0.0026  | 0.03359            | 2            | 13                        | ITGA1,ITGB1                                        |

Table S7

| Category | ID        | Name                                                | Source                          | p-value | q-value<br>FDR B&H | Hit<br>Count | Hit Count<br>in<br>Genome | Hit in Query List             |
|----------|-----------|-----------------------------------------------------|---------------------------------|---------|--------------------|--------------|---------------------------|-------------------------------|
| Pathway  | M6487     | Platelet Amyloid Precursor Protein Pathway          | MSigDB C2<br>BIOCARTA<br>(v6.0) | 0.003   | 0.03788            | 2            | 14                        | PLAT,F9                       |
| Pathway  | M7146     | Classical Complement Pathway                        | MSigDB C2<br>BIOCARTA<br>(v6.0) | 0.003   | 0.03788            | 2            | 14                        | C5,C6                         |
| Pathway  | P00034    | Integrin signalling pathway                         | PantherDB                       | 0.0031  | 0.03852            | 5            | 167                       | LAMA1,LAMB1,LAMC1,ITGA1,ITGB1 |
| Pathway  | 1269304   | CLEC7A (Dectin-1) signaling                         | BioSystems:<br>REACTOME         | 0.0033  | 0.03942            | 4            | 103                       | PPP3CA,PPP3R1,UBE2N,PSMA6     |
| Pathway  | 83099     | Amyotrophic lateral sclerosis (ALS)                 | BioSystems:<br>KEGG             | 0.0034  | 0.03942            | 3            | 51                        | PPP3CA,PPP3R1,BAD             |
| Pathway  | W:0000016 | amyotrophic lateral sclerosis disease               | Pathway<br>Ontology             | 0.0035  | 0.03942            | 2            | 15                        | PPP3CA,BAD                    |
| Pathway  | 1269424   | Phospholipase C-mediated cascade; FGFR4             | BioSystems:<br>REACTOME         | 0.0035  | 0.03942            | 2            | 15                        | PLCG1,FGF16                   |
| Pathway  | 1270271   | Activation of BAD and translocation to mitochondria | BioSystems:<br>REACTOME         | 0.0035  | 0.03942            | 2            | 15                        | PPP3R1,BAD                    |
| Pathway  | W:0000009 | programmed cell death                               | Pathway<br>Ontology             | 0.0035  | 0.03942            | 2            | 15                        | PPP3CA,BAD                    |
| Pathway  | M4835     | B Cell Survival Pathway                             | MSigDB C2<br>BIOCARTA<br>(v6.0) | 0.004   | 0.04428            | 2            | 16                        | ITGA1,ITGB1                   |
| Pathway  | 172846    | Staphylococcus aureus infection                     | BioSystems:<br>KEGG             | 0.0045  | 0.04869            | 3            | 56                        | CFH,C5,CFI                    |
| Pathway  | P00050    | Plasminogen activating cascade                      | PantherDB                       | 0.0045  | 0.04869            | 2            | 17                        | PLAT,PLAUR                    |

**Table S8: pathway analysis of top upregulated protein variables (5% FDR significant) associated with apnea index (modelled as continuous variable)**

| Category               | ID         | Name                                       | Source               | p-value | q-value FDR B&H | Hit Count | Hit Count in Genome | Hit in Query List                                                   |
|------------------------|------------|--------------------------------------------|----------------------|---------|-----------------|-----------|---------------------|---------------------------------------------------------------------|
| Pathway                | 83073      | Complement and coagulation cascades        | BioSystems: KEGG     | 1.3E-14 | 5.5E-12         | 10        | 79                  | CFH,PLAT,PLAUR,C5,C6,CFI,SERPIND1,F9,F10,TFPI                       |
| Pathway                | 1270253    | Laminin interactions                       | BioSystems: REACTOME | 7.7E-09 | 1.6E-06         | 5         | 25                  | LAMB1,LAMC1,ITGA1,ITGB1,LAMA1                                       |
| Pathway                | P00011     | Blood coagulation                          | PantherDB            | 9.3E-08 | 1.3E-05         | 5         | 40                  | PLAT,PLAUR,F9,F10,TFPI                                              |
| Pathway                | 1269369    | Extrinsic Pathway of Fibrin Clot Formation | BioSystems: REACTOME | 2.2E-07 | 2.3E-05         | 3         | 5                   | F9,F10,TFPI                                                         |
| Pathway                | 1457800    | MET activates PTK2 signaling               | BioSystems: REACTOME | 2.8E-07 | 2.3E-05         | 4         | 20                  | LAMB1,LAMC1,ITGB1,LAMA1                                             |
| Pathway                | 1269241    | Complement cascade                         | BioSystems: REACTOME | 4.3E-07 | 3.0E-05         | 5         | 54                  | CFH,C5,C6,CFI,FCN1                                                  |
| Pathway                | 1269250    | Regulation of Complement cascade           | BioSystems: REACTOME | 9.9E-07 | 5.9E-05         | 4         | 27                  | CFH,C5,C6,CFI                                                       |
| Pathway                | 1269340    | Hemostasis                                 | BioSystems: REACTOME | 1.1E-06 | 5.9E-05         | 11        | 640                 | PLAT,PLAUR,ITGA1,ITGB1,SERPIND1,F9,F10,IFNA10,LGALS3BP,TFPI,PDE11A  |
| Pathway                | 1457799    | MET promotes cell motility                 | BioSystems: REACTOME | 1.8E-06 | 8.2E-05         | 4         | 31                  | LAMB1,LAMC1,ITGB1,LAMA1                                             |
| Pathway                | 83068      | ECM-receptor interaction                   | BioSystems: KEGG     | 3.5E-06 | 1.5E-04         | 5         | 82                  | LAMB1,LAMC1,ITGA1,ITGB1,LAMA1                                       |
| GO: Cellular Component | GO:0062023 | collagen-containing extracellular matrix   |                      | 3.0E-11 | 5.6E-09         | 12        | 474                 | APCS,LAMB1,BMP1,LAMC1,PLAT,IL16,ITGB1,FCN1,F9,LGALS3BP,ENTPD1,LAMA1 |
| GO: Cellular Component | GO:0031012 | extracellular matrix                       |                      | 4.4E-10 | 4.1E-08         | 12        | 598                 | APCS,LAMB1,BMP1,LAMC1,PLAT,IL16,ITGB1,FCN1,F9,LGALS3BP,ENTPD1,LAMA1 |
| GO: Cellular Component | GO:0005606 | laminin-1 complex                          |                      | 5.8E-09 | 3.6E-07         | 3         | 3                   | LAMB1,LAMC1,LAMA1                                                   |

|                        |            |                                  |  |         |         |    |      |                                                                          |
|------------------------|------------|----------------------------------|--|---------|---------|----|------|--------------------------------------------------------------------------|
| GO: Cellular Component | GO:0009986 | cell surface                     |  | 2.1E-08 | 9.5E-07 | 13 | 1036 | GHR,IL13RA1,PLAT,PLAUR,ITGA1,ECE1,ITGB1,FCN1,CD80,F10,NOTCH2,ENTPD1,TFPI |
| GO: Cellular Component | GO:0043256 | laminin complex                  |  | 9.5E-07 | 3.5E-05 | 3  | 11   | LAMB1,LAMC1,LAMA1                                                        |
| GO: Cellular Component | GO:0009897 | external side of plasma membrane |  | 1.4E-06 | 4.4E-05 | 8  | 454  | GHR,IL13RA1,ITGA1,ECE1,ITGB1,FCN1,CD80,F10                               |
| GO: Cellular Component | GO:0005604 | basement membrane                |  | 2.0E-06 | 5.1E-05 | 5  | 113  | LAMB1,LAMC1,ITGB1,ENTPD1,LAMA1                                           |
| GO: Cellular Component | GO:0098552 | side of membrane                 |  | 2.5E-06 | 5.1E-05 | 9  | 663  | GHR,IL13RA1,ITGA1,PPP3CA,ECE1,ITGB1,FCN1,CD80,F10                        |
| GO: Cellular Component | GO:0097478 | leaflet of membrane bilayer      |  | 2.5E-06 | 5.1E-05 | 9  | 663  | GHR,IL13RA1,ITGA1,PPP3CA,ECE1,ITGB1,FCN1,CD80,F10                        |
| GO: Cellular Component | GO:0034665 | integrin alpha1-beta1 complex    |  | 3.3E-06 | 6.2E-05 | 2  | 2    | ITGA1,ITGB1                                                              |
| GO: Biological Process | GO:0072376 | protein activation cascade       |  | 1.4E-10 | 2.4E-07 | 9  | 207  | CFH,APCS,C5,C6,CFI,FCN1,F9,F10,TFPI                                      |
| GO: Biological Process | GO:0042060 | wound healing                    |  | 1.2E-08 | 1.0E-05 | 11 | 617  | APCS,PLAT,PLAUR,PPP3CA,SERPIND1,F9,F10,NOTCH2,IFNA10,ENTPD1,TFPI         |
| GO: Biological Process | GO:0009611 | response to wounding             |  | 9.2E-08 | 5.4E-05 | 11 | 756  | APCS,PLAT,PLAUR,PPP3CA,SERPIND1,F9,F10,NOTCH2,IFNA10,ENTPD1,TFPI         |
| GO: Biological Process | GO:0007596 | blood coagulation                |  | 2.5E-07 | 7.9E-05 | 8  | 353  | PLAT,PLAUR,SERPIND1,F9,F10,IFNA10,ENTPD1,TFPI                            |
| GO: Biological Process | GO:0007599 | hemostasis                       |  | 2.8E-07 | 7.9E-05 | 8  | 358  | PLAT,PLAUR,SERPIND1,F9,F10,IFNA10,ENTPD1,TFPI                            |
| GO: Biological Process | GO:0050817 | coagulation                      |  | 2.9E-07 | 7.9E-05 | 8  | 360  | PLAT,PLAUR,SERPIND1,F9,F10,IFNA10,ENTPD1,TFPI                            |

|                        |            |                                                     |  |         |         |    |      |                                                                               |
|------------------------|------------|-----------------------------------------------------|--|---------|---------|----|------|-------------------------------------------------------------------------------|
| GO: Biological Process | GO:0002682 | regulation of immune system process                 |  | 3.1E-07 | 7.9E-05 | 15 | 1776 | IL34,CFH,APCS,CD70,C5,C6,PPP3CA,MED1,PPP3R1,CFI,ITGB1,IL18R1,FCN1,CD80,NOTCH2 |
| GO: Biological Process | GO:0006959 | humoral immune response                             |  | 3.9E-07 | 8.5E-05 | 8  | 373  | CFH,APCS,C5,C6,CFI,FCN1,NOTCH2,IFNA10                                         |
| GO: Biological Process | GO:0050878 | regulation of body fluid levels                     |  | 6.2E-07 | 1.2E-04 | 9  | 548  | PLAT,PLAUR,MED1,SERPIND1,F9,F10,IFNA10,ENTPD1,TFPI                            |
| GO: Biological Process | GO:0050776 | regulation of immune response                       |  | 9.2E-07 | 1.6E-04 | 12 | 1170 | CFH,APCS,C5,C6,PPP3CA,MED1,PPP3R1,CFI,ITGB1,IL18R1,FCN1,CD80                  |
| GO: Molecular Function | GO:0004175 | endopeptidase activity                              |  | 5.4E-08 | 1.3E-05 | 12 | 859  | POR,BMP1,PLAT,PLAUR,C5,ECE1,CFI,ANP32B,SERPIND1,F9,F10,TFPI                   |
| GO: Molecular Function | GO:0070011 | peptidase activity, acting on L-amino acid peptides |  | 4.2E-07 | 4.9E-05 | 13 | 1255 | POR,BMP1,PLAT,PLAUR,C5,ACY1,ECE1,CFI,ANP32B,SERPIND1,F9,F10,TFPI              |
| GO: Molecular Function | GO:0008233 | peptidase activity                                  |  | 6.1E-07 | 4.9E-05 | 13 | 1296 | POR,BMP1,PLAT,PLAUR,C5,ACY1,ECE1,CFI,ANP32B,SERPIND1,F9,F10,TFPI              |
| GO: Molecular Function | GO:0043208 | glycosphingolipid binding                           |  | 1.5E-06 | 9.3E-05 | 3  | 12   | LAMB1,LAMC1,LAMA1                                                             |
| GO: Molecular Function | GO:0005102 | signaling receptor binding                          |  | 4.6E-06 | 1.9E-04 | 14 | 1817 | IL34,LAMB1,BMP1,CD70,PLAT,PLAUR,IL16,C5,ITGA1,MED1,ITGB1,FCN1,IFNA10,LAMA1    |
| GO: Molecular Function | GO:0005125 | cytokine activity                                   |  | 4.8E-06 | 1.9E-04 | 6  | 225  | IL34,BMP1,CD70,IL16,C5,IFNA10                                                 |
| GO: Molecular Function | GO:0004252 | serine-type endopeptidase activity                  |  | 1.2E-05 | 4.3E-04 | 6  | 265  | PLAT,CFI,SERPIND1,F9,F10,TFPI                                                 |
| GO: Molecular Function | GO:0051861 | glycolipid binding                                  |  | 1.8E-05 | 4.7E-04 | 3  | 26   | LAMB1,LAMC1,LAMA1                                                             |

|                        |            |                                                              |                  |         |         |    |      |                                                                                   |
|------------------------|------------|--------------------------------------------------------------|------------------|---------|---------|----|------|-----------------------------------------------------------------------------------|
| GO: Molecular Function | GO:0008236 | serine-type peptidase activity                               |                  | 1.9E-05 | 4.7E-04 | 6  | 287  | PLAT,CFI,SERPIND1,F9,F10,TFPI                                                     |
| GO: Molecular Function | GO:0016825 | hydrolase activity, acting on acid phosphorus-nitrogen bonds |                  | 2.1E-05 | 4.7E-04 | 6  | 292  | PLAT,CFI,SERPIND1,F9,F10,TFPI                                                     |
| Disease                | C0001733   | Afibrinogenemia                                              | DisGeNET Curated | 2.5E-08 | 3.2E-05 | 4  | 14   | CFH,CFI,F9,F10                                                                    |
| Disease                | C0243026   | Sepsis                                                       | DisGeNET Curated | 1.8E-07 | 1.2E-04 | 10 | 510  | CFH,PLAT,PLAUR,C5,PPP3CA,ITGB1,FCN1,CD80,F9,TFPI                                  |
| Disease                | C0036690   | Septicemia                                                   | DisGeNET Curated | 8.5E-07 | 3.5E-04 | 9  | 461  | CFH,PLAT,PLAUR,C5,PPP3CA,ITGB1,FCN1,CD80,TFPI                                     |
| Disease                | C1956346   | Coronary Artery Disease                                      | DisGeNET Curated | 1.3E-06 | 3.5E-04 | 11 | 800  | CFH,APCS,PLAT,IL16,ITGA1,ECE1,ANP32B,F9,F10,LGALS3BP,TFPI                         |
| Disease                | C0151699   | Intracranial Hemorrhages                                     | DisGeNET Curated | 1.4E-06 | 3.5E-04 | 4  | 36   | PLAT,F9,F10,TFPI                                                                  |
| Disease                | C0003873   | Rheumatoid Arthritis                                         | DisGeNET Curated | 1.6E-06 | 3.5E-04 | 15 | 1633 | IL34,CFH,CD70,PLAT,IL16,C5,ITGA1,PPP3CA,ITGB1,IL18R1,FCN1,CD80,ANP32B,F9,LGALS3BP |
| Disease                | C0024141   | Lupus Erythematosus, Systemic                                | DisGeNET Curated | 6.4E-06 | 1.2E-03 | 11 | 941  | CFH,APCS,CD70,LAMC1,IL16,C6,ITGB1,IL18R1,CD80,ANP32B,LAMA1                        |
| Disease                | C1861172   | Venous Thromboembolism                                       | DisGeNET Curated | 9.3E-06 | 1.4E-03 | 3  | 18   | PLAT,SERPIND1,TFPI                                                                |
| Disease                | C0584960   | Factor V Leiden mutation                                     | DisGeNET BeFree  | 1.0E-05 | 1.4E-03 | 4  | 59   | BMP1,SERPIND1,F9,TFPI                                                             |
| Disease                | C0004364   | Autoimmune Diseases                                          | DisGeNET Curated | 1.4E-05 | 1.4E-03 | 11 | 1018 | CFH,APCS,CD70,IL16,ITGB1,IL18R1,CD80,ANP32B,F9,LGALS3BP,ENTPD1                    |

Table S9

| Table S9: pathway analysis of top downregulated protein variables (5% FDR significant) associated with apnea index (modelled as continuous variable) |            |                                            |        |         |                 |           |                     |                                                                                  |
|------------------------------------------------------------------------------------------------------------------------------------------------------|------------|--------------------------------------------|--------|---------|-----------------|-----------|---------------------|----------------------------------------------------------------------------------|
| Category                                                                                                                                             | ID         | Name                                       | Source | p-value | q-value FDR B&H | Hit Count | Hit Count in Genome | Hit in Query List                                                                |
| GO: Cellular Component                                                                                                                               | GO:0005956 | protein kinase CK2 complex                 |        | 7.0E-06 | 1.5E-03         | 2         | 3                   | CSNK2A1,CSNK2B                                                                   |
| GO: Biological Process                                                                                                                               | GO:0009967 | positive regulation of signal transduction |        | 1.8E-06 | 2.1E-03         | 13        | 1823                | S100A4,CCL13,HINT1,TNFRSF10A,NRXN1,GDF2,MSTN,XCL1,CSNK2A1,CSNK2B,PSMA6,BAD,IFNL1 |
| GO: Biological Process                                                                                                                               | GO:0046434 | organophosphate catabolic process          |        | 3.4E-06 | 2.1E-03         | 5         | 148                 | PDXP,PDE2A,HINT1,MBD4,PRDX6                                                      |
| GO: Biological Process                                                                                                                               | GO:0051187 | cofactor catabolic process                 |        | 4.5E-06 | 2.1E-03         | 4         | 70                  | PDXP,SNCA,PRDX6,PRDX1                                                            |
| GO: Biological Process                                                                                                                               | GO:0019220 | regulation of phosphate metabolic process  |        | 4.8E-06 | 2.1E-03         | 13        | 1994                | PDE2A,CCL13,TNFRSF10A,SNCA,NRXN1,GDF2,MSTN,XCL1,CSNK2A1,CSNK2B,PRDX1,BAD,IFNL1   |
| GO: Biological Process                                                                                                                               | GO:0051174 | regulation of phosphorus metabolic process |        | 4.8E-06 | 2.1E-03         | 13        | 1995                | PDE2A,CCL13,TNFRSF10A,SNCA,NRXN1,GDF2,MSTN,XCL1,CSNK2A1,CSNK2B,PRDX1,BAD,IFNL1   |
| GO: Biological Process                                                                                                                               | GO:0042325 | regulation of phosphorylation              |        | 9.2E-06 | 2.6E-03         | 12        | 1781                | PDE2A,CCL13,TNFRSF10A,SNCA,NRXN1,GDF2,MSTN,XCL1,CSNK2B,PRDX1,BAD,IFNL1           |
| GO: Biological Process                                                                                                                               | GO:0042327 | positive regulation of phosphorylation     |        | 1.0E-05 | 2.6E-03         | 10        | 1197                | CCL13,TNFRSF10A,SNCA,NRXN1,GDF2,MSTN,XCL1,CSNK2B,BAD,IFNL1                       |
| GO: Biological Process                                                                                                                               | GO:0019637 | organophosphate metabolic process          |        | 1.1E-05 | 2.6E-03         | 10        | 1203                | PDXP,AK1,PDE2A,HINT1,SNCA,MBD4,CSNK2A1,PRDX6,CSNK2B,BAD                          |
| GO: Biological Process                                                                                                                               | GO:0001906 | cell killing                               |        | 1.1E-05 | 2.6E-03         | 5         | 189                 | CCL13,XCL1,PRDX1,BAD,CRTAM                                                       |



Table S9

| Category               | ID         | Name                                                    | Source    | p-value | q-value FDR B&H | Hit Count | Hit Count in Genome | Hit in Query List                                                          |
|------------------------|------------|---------------------------------------------------------|-----------|---------|-----------------|-----------|---------------------|----------------------------------------------------------------------------|
| GO: Biological Process | GO:0009719 | response to endogenous stimulus                         |           | 1.2E-05 | 2.6E-03         | 12        | 1834                | PDXP,PDE2A,IGFBP1,DHH,SNCA,NRXN1,MBD4,GDF2,MSTN,XCL1,CSNK2B,BAD            |
| GO: Molecular Function | GO:0005102 | signaling receptor binding                              |           | 1.8E-05 | 3.3E-03         | 12        | 1817                | S100A4,CCL13,IGFBP1,DHH,SNCA,NRXN1,GDF2,MSTN,XCL1,CSNK2B,CRTAM,IFNL1       |
| GO: Molecular Function | GO:0098772 | molecular function regulator                            |           | 2.9E-05 | 3.3E-03         | 12        | 1905                | CCL13,TNFRSF10A,SNCA,NRXN1,GDF2,MSTN,XCL1,CSNK2A1,CSNK2B,BAD,IFNL1,EIF5    |
| GO: Molecular Function | GO:0005125 | cytokine activity                                       |           | 3.3E-05 | 3.3E-03         | 5         | 225                 | CCL13,GDF2,MSTN,XCL1,IFNL1                                                 |
| GO: Molecular Function | GO:0042802 | identical protein binding                               |           | 4.6E-05 | 3.5E-03         | 12        | 1995                | PDXP,S100A4,PDE2A,SNCA,MSTN,XCL1,CSNK2A1,PRDX6,CSNK2B,PAFAH1B2,PRDX1,CRTAM |
| GO: Molecular Function | GO:0031072 | heat shock protein binding                              |           | 9.2E-05 | 4.6E-03         | 4         | 144                 | PDXP,SNCA,CSNK2A1,KPNB1                                                    |
| GO: Molecular Function | GO:0004601 | peroxidase activity                                     |           | 1.1E-04 | 4.6E-03         | 3         | 56                  | SNCA,PRDX6,PRDX1                                                           |
| GO: Molecular Function | GO:0016788 | hydrolase activity, acting on ester bonds               |           | 1.3E-04 | 4.6E-03         | 9         | 1237                | PDXP,PDE2A,SNCA,MBD4,CSNK2A1,PRDX6,CA1,PAFAH1B2,KPNB1                      |
| GO: Molecular Function | GO:0016684 | oxidoreductase activity, acting on peroxide as acceptor |           | 1.3E-04 | 4.6E-03         | 3         | 60                  | SNCA,PRDX6,PRDX1                                                           |
| GO: Molecular Function | GO:0051920 | peroxiredoxin activity                                  |           | 1.5E-04 | 4.6E-03         | 2         | 11                  | PRDX6,PRDX1                                                                |
| GO: Molecular Function | GO:0005126 | cytokine receptor binding                               |           | 1.5E-04 | 4.6E-03         | 5         | 312                 | CCL13,GDF2,MSTN,XCL1,IFNL1                                                 |
| Pathway                | P00049     | Parkinson disease                                       | PantherDB | 5.3E-05 | 1.4E-02         | 4         | 87                  | SNCA,CSNK2A1,CSNK2B,PSMA6                                                  |

Table S9

| Category | ID          | Name                                                        | Source                                    | p-value | q-value FDR B&H | Hit Count | Hit Count in Genome | Hit in Query List               |
|----------|-------------|-------------------------------------------------------------|-------------------------------------------|---------|-----------------|-----------|---------------------|---------------------------------|
| Pathway  | 137913      | Alpha-synuclein signaling                                   | BioSystems : Pathway Interaction Database | 6.0E-05 | 1.4E-02         | 3         | 32                  | SNCA,CSNK2A1,BAD                |
| Pathway  | M5883       | Genes encoding secreted soluble factors                     | MSigDB C2 BIOCARTA (v6.0)                 | 1.4E-04 | 2.2E-02         | 6         | 344                 | S100A4,CCL13,DHH,GDF2,MSTN,XCL1 |
| Pathway  | 137953      | Role of Calcineurin-dependent NFAT signaling in lymphocytes | BioSystems : Pathway Interaction Database | 2.4E-04 | 2.3E-02         | 3         | 51                  | CSNK2A1,BAD,KPNB1               |
| Pathway  | 1269600     | WNT mediated activation of DVL                              | BioSystems : REACTOME                     | 2.5E-04 | 2.3E-02         | 2         | 10                  | CSNK2A1,CSNK2B                  |
| Pathway  | 1269822     | Condensation of Prometaphase Chromosomes                    | BioSystems : REACTOME                     | 3.0E-04 | 2.4E-02         | 2         | 11                  | CSNK2A1,CSNK2B                  |
| Pathway  | 1270262     | Apoptosis                                                   | BioSystems : REACTOME                     | 7.6E-04 | 4.7E-02         | 4         | 174                 | TNFRSF10A,PSMA6,BAD,KPNB1       |
| Pathway  | 1270261     | Programmed Cell Death                                       | BioSystems : REACTOME                     | 8.1E-04 | 4.7E-02         | 4         | 177                 | TNFRSF10A,PSMA6,BAD,KPNB1       |
| Disease  | C0236642    | Pick Disease of the Brain                                   | DisGeNET Curated                          | 9.8E-04 | 3.9E-02         | 3         | 100                 | SNCA,PRDX6,PRDX1                |
| Disease  | OMIN:168601 | PARKINSON DISEASE 1, AUTOSOMAL DOMINANT; PARK1              | OMIM                                      | 2.0E-03 | 3.9E-02         | 1         | 1                   | SNCA                            |
| Disease  | OMIN:233420 | 46,XY GONADAL DYSGENESIS, COMPLETE OR PARTIAL, DHH-RELATED  | OMIM                                      | 2.0E-03 | 3.9E-02         | 1         | 1                   | DHH                             |

Table S9

| Category | ID          | Name                                                       | Source              | p-value | q-value FDR B&H | Hit Count | Hit Count in Genome | Hit in Query List |
|----------|-------------|------------------------------------------------------------|---------------------|---------|-----------------|-----------|---------------------|-------------------|
| Disease  | C3809710    | TELANGIECTASIA, HEREDITARY HEMORRHAGIC, TYPE 5             | DisGeNET Curated    | 2.0E-03 | 3.9E-02         | 1         | 1                   | GDF2              |
| Disease  | C3280524    | SCHIZOPHRENIA 17                                           | DisGeNET Curated    | 2.0E-03 | 3.9E-02         | 1         | 1                   | NRXN1             |
| Disease  | cv:CN074193 | Gamstorp-Wohlfart syndrome                                 | Clinical Variations | 2.0E-03 | 3.9E-02         | 1         | 1                   | HINT1             |
| Disease  | C2939414    | Nuclear sclerosis                                          | DisGeNET BeFree     | 2.0E-03 | 3.9E-02         | 1         | 1                   | PRDX6             |
| Disease  | C1851957    | Diffuse Lewy Body Disease with Gaze Palsy                  | DisGeNET Curated    | 2.0E-03 | 3.9E-02         | 1         | 1                   | SNCA              |
| Disease  | C1856273    | 46,XY Gonadal Dysgenesis, Complete or Partial, DHH-Related | DisGeNET Curated    | 2.0E-03 | 3.9E-02         | 1         | 1                   | DHH               |
| Disease  | cv:C3280479 | Pitt-Hopkins-like syndrome 2                               | Clinical Variations | 2.0E-03 | 3.9E-02         | 1         | 1                   | NRXN1             |

Table S10

| <b>Table S10: List of association of protein variables with central apnea index (CAI)</b> |          |                |              |          |                |                                      |                            |               |                      |
|-------------------------------------------------------------------------------------------|----------|----------------|--------------|----------|----------------|--------------------------------------|----------------------------|---------------|----------------------|
| <b>vars</b>                                                                               | <b>t</b> | <b>P.Value</b> | <b>logFC</b> | <b>B</b> | <b>5%FDR P</b> | <b>TargetFullName</b>                | <b>UniProt</b>             | <b>GeneID</b> | <b>Symbol</b>        |
| ROBO3                                                                                     | 6.935    | 9.3E-12        | 0.053        | 15.979   | 1.2E-08        | Roundabout homolog 3                 | Q96MS0                     | 64221         | ROBO3                |
| CYTF                                                                                      | 4.966    | 8.6E-07        | 0.072        | 4.895    | 5.6E-04        | Cystatin-F                           | O76096                     | 8530          | CST7                 |
| CRIS3                                                                                     | 3.662    | 2.7E-04        | 0.028        | -0.557   | 1.0E-01        | Cysteine-rich secretory protein 3    | P54108                     | 10321         | CRISP3               |
| ZNRF3                                                                                     | 3.619    | 3.2E-04        | 0.038        | -0.707   | 1.0E-01        | E3 ubiquitin-protein ligase ZNRF3    | Q9ULT6                     | 84133         | ZNRF3                |
| Coagulation Factor IX                                                                     | -3.109   | 2.0E-03        | -0.021       | -2.390   | 3.2E-01        | Coagulation factor IX                | P00740                     | 2158          | F9                   |
| EPI                                                                                       | 3.133    | 1.8E-03        | 0.034        | -2.316   | 3.2E-01        | Epiregulin                           | O14944                     | 2069          | EREG                 |
| GP1BA                                                                                     | 3.178    | 1.5E-03        | 0.018        | -2.176   | 3.2E-01        | Platelet glycoprotein Ib alpha chain | P07359                     | 2811          | GP1BA                |
| MMP-7                                                                                     | 3.155    | 1.7E-03        | 0.031        | -2.249   | 3.2E-01        | Matrilysin                           | P09237                     | 4316          | MMP7                 |
| FCN1                                                                                      | 2.993    | 2.9E-03        | 0.025        | -2.736   | 4.0E-01        | Ficolin-1                            | O00602                     | 2219          | FCN1                 |
| MDM2                                                                                      | 2.970    | 3.1E-03        | 0.018        | -2.805   | 4.0E-01        | E3 ubiquitin-protein ligase Mdm2     | Q00987                     | 4193          | MDM2                 |
| Cathepsin V                                                                               | -2.861   | 4.3E-03        | -0.026       | -3.116   | 5.1E-01        | Cathepsin L2                         | O60911                     | 1515          | CTSV                 |
| C1q                                                                                       | -2.795   | 5.3E-03        | -0.030       | -3.300   | 5.8E-01        | Complement C1q subcomponent          | P02745<br>P02746<br>P02747 | 712 713 714   | C1QA<br>C1QB<br>C1QC |
| MFRP                                                                                      | 2.769    | 5.8E-03        | 0.018        | -3.726   | 5.8E-01        | Membrane frizzled-related protein    | Q9BY79                     | 83552         | MFRP                 |
| Angiotensinogen                                                                           | -2.721   | 6.7E-03        | -0.027       | -3.502   | 5.8E-01        | Angiotensinogen                      | P01019                     | 183           | AGT                  |
| SET                                                                                       | -2.737   | 6.4E-03        | -0.016       | -3.458   | 5.8E-01        | Protein SET                          | Q01105                     | 6418          | SET                  |
| EPHB2                                                                                     | 2.648    | 8.3E-03        | 0.013        | -3.695   | 6.2E-01        | Ephrin type-B receptor 2             | P29323                     | 2048          | EPHB2                |
| b2-Microglobulin                                                                          | 2.660    | 8.0E-03        | 0.019        | -3.662   | 6.2E-01        | Beta-2-microglobulin                 | P61769                     | 567           | B2M                  |
| resistin                                                                                  | 2.636    | 8.6E-03        | 0.021        | -3.725   | 6.2E-01        | Resistin                             | Q9HD89                     | 56729         | RETN                 |

Table S11

| <b>Table S11: List of association of protein variables with 2 % oxygen desaturation event index</b> |        |            |        |        |         |                                              |                              |                        |                         |
|-----------------------------------------------------------------------------------------------------|--------|------------|--------|--------|---------|----------------------------------------------|------------------------------|------------------------|-------------------------|
| vars                                                                                                | t      | P.Value    | logFC  | B      | 5%FDR P | TargetFullName                               | UniProt                      | GeneID                 | Symbol                  |
| Laminin                                                                                             | 4.258  | 2.3809E-05 | 0.005  | -0.040 | 0.0230  | Laminin                                      | P25391,<br>P07942,<br>P11047 | 284217<br>3912<br>3915 | LAMA1<br>LAMB1<br>LAMC1 |
| UNC5H4                                                                                              | -4.116 | 4.3778E-05 | -0.006 | -0.620 | 0.0230  | Netrin receptor UNC5D                        | Q6UXZ4                       | 137970                 | UNC5D                   |
| tPA                                                                                                 | 4.069  | 5.3312E-05 | 0.005  | -0.807 | 0.0230  | Tissue-type plasminogen activator            | P00750                       | 5327                   | PLAT                    |
| Aminoacylase-1                                                                                      | 3.757  | 0.00019    | 0.010  | -1.999 | 0.0609  | Aminoacylase-1                               | Q03154                       | 95                     | ACY1                    |
| HPLN1                                                                                               | 3.583  | 0.00037    | 0.005  | -2.627 | 0.0951  | Hyaluronan and proteoglycan link protein 1   | P10915                       | 1404                   | HAPLN1                  |
| HCK                                                                                                 | 3.509  | 0.00048    | 0.002  | -2.883 | 0.1042  | Tyrosine-protein kinase HCK                  | P08631                       | 3055                   | HCK                     |
| MMP-12                                                                                              | 3.316  | 0.00097    | 0.007  | -3.533 | 0.1794  | Macrophage metalloelastase                   | P39900                       | 4321                   | MMP12                   |
| Integrin a1b1                                                                                       | 3.237  | 0.00127    | 0.006  | -3.785 | 0.2061  | Integrin alpha-I: beta-1 complex             | P56199,<br>P05556            | 3672<br>3688           | ITGA1<br>ITGB1          |
| Angiotensinogen                                                                                     | -3.015 | 0.00267    | -0.005 | -4.469 | 0.3343  | Angiotensinogen                              | P01019                       | 183                    | AGT                     |
| IGFBP-1                                                                                             | -3.045 | 0.00243    | -0.011 | -4.381 | 0.3343  | Insulin-like growth factor-binding protein 1 | P08833                       | 3484                   | IGFBP1                  |
| MCP-2                                                                                               | 2.974  | 0.00306    | 0.005  | -4.593 | 0.3343  | C-C motif chemokine 8                        | P80075                       | 6355                   | CCL8                    |
| bFGF-R                                                                                              | -2.970 | 0.00309    | -0.003 | -4.603 | 0.3343  | Fibroblast growth factor receptor 1          | P11362                       | 2260                   | FGFR1                   |
| Stanniocalcin-1                                                                                     | 2.935  | 0.00346    | 0.004  | -4.705 | 0.3453  | Stanniocalcin-1                              | P52823                       | 6781                   | STC1                    |
| Midkine                                                                                             | -2.873 | 0.00420    | -0.007 | -4.882 | 0.3894  | Midkine                                      | P21741                       | 4192                   | MDK                     |
| MMP-7                                                                                               | 2.752  | 0.00611    | 0.004  | -5.221 | 0.4862  | Matrilysin                                   | P09237                       | 4316                   | MMP7                    |
| Mn SOD                                                                                              | -2.752 | 0.00610    | -0.003 | -5.220 | 0.4862  | Superoxide dismutase [Mn], mitochondrial     | P04179                       | 6648                   | SOD2                    |
| SLIK5                                                                                               | -2.737 | 0.00637    | -0.003 | -5.259 | 0.4862  | SLIT and NTRK-like protein 5                 | O94991                       | 26050                  | SLITRK5                 |
| TECK                                                                                                | 2.715  | 0.00682    | 0.007  | -5.320 | 0.4911  | C-C motif chemokine 25                       | O15444                       | 6370                   | CCL25                   |

Table S12

| <b>Table S12: List of association of protein variables with mean oxygen saturation level during sleep (Mean SaO2 %)</b> |          |                |              |          |                |                                                  |                |               |               |
|-------------------------------------------------------------------------------------------------------------------------|----------|----------------|--------------|----------|----------------|--------------------------------------------------|----------------|---------------|---------------|
| <b>vars</b>                                                                                                             | <b>t</b> | <b>P.Value</b> | <b>logFC</b> | <b>B</b> | <b>5%FDR P</b> | <b>TargetFullName</b>                            | <b>UniProt</b> | <b>GeneID</b> | <b>Symbol</b> |
| NovH                                                                                                                    | -4.448   | 1.00949E-05    | -2.501       | 3.027    | 0.013          | Protein NOV homolog                              | P48745         | 4856          | NOV           |
| UNC5H4                                                                                                                  | 4.267    | 2.25044E-05    | 3.886        | 2.340    | 0.015          | Netrin receptor UNC5D                            | Q6UXZ4         | 137970        | UNC5D         |
| CD40 ligand,<br>soluble                                                                                                 | -3.619   | 0.0003         | -3.887       | 0.095    | 0.114          | CD40 ligand                                      | P29965         | 959           | CD40LG        |
| MCP-2                                                                                                                   | -3.542   | 0.0004         | -3.499       | -0.149   | 0.114          | C-C motif chemokine 8                            | P80075         | 6355          | CCL8          |
| Prothrombin                                                                                                             | 3.533    | 0.0004         | 3.775        | -0.177   | 0.114          | Prothrombin                                      | P00734         | 2147          | F2            |
| TBP                                                                                                                     | -3.445   | 0.0006         | -2.261       | -0.448   | 0.131          | TATA-box-binding protein                         | P20226         | 6908          | TBP           |
| CLC4K                                                                                                                   | -3.320   | 0.0009         | -2.011       | -0.821   | 0.143          | C-type lectin domain family 4<br>member K        | Q9UJ71         | 50489         | CD207         |
| LD78-beta                                                                                                               | -3.296   | 0.0010         | -2.624       | -0.893   | 0.143          | C-C motif chemokine 3-like 1                     | P16619         | 414062        | CCL3L1        |
| MCP-1                                                                                                                   | -3.302   | 0.0010         | -2.952       | -0.874   | 0.143          | C-C motif chemokine 2                            | P13500         | 6347          | CCL2          |
| TARC                                                                                                                    | -3.277   | 0.0011         | -5.581       | -0.948   | 0.143          | C-C motif chemokine 17                           | Q92583         | 6361          | CCL17         |
| Glutamate<br>carboxypeptidase                                                                                           | -3.186   | 0.0015         | -2.034       | -1.208   | 0.178          | Cytosolic non-specific dipeptidase               | Q96KP4         | 55748         | CNDP2         |
| GV                                                                                                                      | -3.071   | 0.0022         | -1.757       | -1.527   | 0.204          | Calcium-dependent<br>phospholipase A2            | P39877         | 5322          | PLA2G5        |
| Insulin                                                                                                                 | -3.052   | 0.0024         | -3.681       | -1.578   | 0.204          | Insulin                                          | P01308         | 3630          | INS           |
| NET4                                                                                                                    | -3.079   | 0.0022         | -1.646       | -1.505   | 0.204          | Netrin-4                                         | Q9HB63         | 59277         | NTN4          |
| PARC                                                                                                                    | -3.066   | 0.0023         | -4.352       | -1.542   | 0.204          | C-C motif chemokine 18                           | P55774         | 6362          | CCL18         |
| EMAP-2                                                                                                                  | -3.012   | 0.0027         | -3.044       | -1.687   | 0.205          | Endothelial monocyte-activating<br>polypeptide 2 | Q12904         | 9255          | AIMP1         |
| GNS                                                                                                                     | -2.993   | 0.0029         | -2.751       | -1.738   | 0.205          | N-acetylglucosamine-6-sulfatase                  | P15586         | 2799          | GNS           |
| NKp44                                                                                                                   | -2.977   | 0.0030         | -1.536       | -1.779   | 0.205          | Natural cytotoxicity triggering<br>receptor 2    | O95944         | 9436          | NCR2          |

Table S13

| <b>Table S13: List of association of protein variables with low oxygen saturation level during sleep (Low SaO<sub>2</sub>)</b> |          |                |              |          |                |                                                          |                |               |               |
|--------------------------------------------------------------------------------------------------------------------------------|----------|----------------|--------------|----------|----------------|----------------------------------------------------------|----------------|---------------|---------------|
| <b>vars</b>                                                                                                                    | <b>t</b> | <b>P.Value</b> | <b>logFC</b> | <b>B</b> | <b>5%FDR P</b> | <b>TargetFullName</b>                                    | <b>UniProt</b> | <b>GeneID</b> | <b>Symbol</b> |
| UNC5H4                                                                                                                         | 4.941    | 9.7187E-07     | 1.223        | 4.817    | 0.001          | Netrin receptor UNC5D                                    | Q6UXZ4         | 137970        | UNC5D         |
| tPA                                                                                                                            | -3.936   | 9.09599E-05    | -0.963       | 1.052    | 0.059          | Tissue-type plasminogen activator                        | P00750         | 5327          | PLAT          |
| IL-17 RD                                                                                                                       | -3.794   | 0.00016        | -0.725       | 0.584    | 0.070          | Interleukin-17 receptor D                                | Q8NFM7         | 54756         | IL17RD        |
| MIP-3a                                                                                                                         | -3.512   | 0.00047        | -1.025       | -0.296   | 0.154          | C-C motif chemokine 20                                   | P78556         | 6364          | CCL20         |
| NET1                                                                                                                           | -3.339   | 0.00089        | -0.947       | -0.802   | 0.192          | Netrin-1                                                 | O95631         | 9423          | NTN1          |
| Nr-CAM                                                                                                                         | 3.338    | 0.00089        | 1.125        | -0.805   | 0.192          | Neuronal cell adhesion molecule                          | Q92823         | 4897          | NRCAM         |
| EPI                                                                                                                            | -2.919   | 0.00362        | -0.962       | -1.928   | 0.467          | Epiregulin                                               | O14944         | 2069          | EREG          |
| IGFBP-1                                                                                                                        | 2.973    | 0.00305        | 1.982        | -1.793   | 0.467          | Insulin-like growth factor-binding protein 1             | P08833         | 3484          | IGFBP1        |
| NCAM-120                                                                                                                       | 2.891    | 0.00396        | 0.630        | -1.999   | 0.467          | Neural cell adhesion molecule 1, 120 kDa isoform         | P13591         | 4684          | NCAM1         |
| NRX3B                                                                                                                          | 2.921    | 0.00360        | 0.585        | -1.923   | 0.467          | Neurexin-3-beta                                          | Q9HDB5         | 9369          | NRXN3         |
| XPNPEP1                                                                                                                        | -2.954   | 0.00324        | -0.933       | -1.840   | 0.467          | Xaa-Pro aminopeptidase 1                                 | Q9NQW7         | 7511          | XPNPEP1       |
| FCN1                                                                                                                           | -2.826   | 0.00485        | -0.713       | -2.159   | 0.524          | Ficolin-1                                                | O00602         | 2219          | FCN1          |
| Aminoacylase-1                                                                                                                 | -2.656   | 0.00809        | -1.257       | -2.560   | 0.549          | Aminoacylase-1                                           | Q03154         | 95            | ACY1          |
| Cathepsin D                                                                                                                    | -2.628   | 0.00877        | -1.160       | -2.623   | 0.549          | Cathepsin D                                              | P07339         | 1509          | CTSD          |
| Factor B                                                                                                                       | -2.717   | 0.00676        | -0.418       | -2.420   | 0.549          | Complement factor B                                      | P00751         | 629           | CFB           |
| Factor I                                                                                                                       | -2.678   | 0.00758        | -0.369       | -2.509   | 0.549          | Complement factor I                                      | P05156         | 3426          | CFI           |
| GPDA                                                                                                                           | -2.632   | 0.00867        | -1.410       | -2.614   | 0.549          | Glycerol-3-phosphate dehydrogenase [NAD(+)], cytoplasmic | P21695         | 2819          | GPD1          |
| MAPK14                                                                                                                         | -2.624   | 0.00889        | -0.467       | -2.633   | 0.549          | Mitogen-activated protein kinase 14                      | Q16539         | 1432          | MAPK14        |

Table S14

| <b>Table S14: List of association of protein variables with pre and post CPAP intervention, paired significance analysis of microarrays (SAMR) was performed</b> |                  |                      |                           |                    |                    |                             |
|------------------------------------------------------------------------------------------------------------------------------------------------------------------|------------------|----------------------|---------------------------|--------------------|--------------------|-----------------------------|
| <b>Gene Name</b>                                                                                                                                                 | <b>Score (d)</b> | <b>Numerator (r)</b> | <b>Denominator (s+s0)</b> | <b>Fold Change</b> | <b>q-value (%)</b> | <b>p.values permutation</b> |
| IGFBP-3                                                                                                                                                          | 3.144            | 0.057                | 0.018                     | 1.040              | 0.000              | 0.0013                      |
| LEAP-1                                                                                                                                                           | -2.993           | -0.136               | 0.045                     | 0.910              | 0.000              | 0.0016                      |
| BMP-1                                                                                                                                                            | 2.693            | 0.048                | 0.018                     | 1.034              | 0.000              | 0.0028                      |
| Siglec-9                                                                                                                                                         | -2.495           | -0.082               | 0.033                     | 0.944              | 26.590             | 0.0046                      |
| CLC7A                                                                                                                                                            | 2.208            | 0.036                | 0.016                     | 1.025              | 61.577             | 0.0101                      |
| NID2                                                                                                                                                             | 2.193            | 0.044                | 0.020                     | 1.031              | 61.577             | 0.0106                      |
| 3HAO                                                                                                                                                             | 2.118            | 0.050                | 0.024                     | 1.036              | 61.577             | 0.0132                      |
| Trypsin 2                                                                                                                                                        | 2.045            | 0.047                | 0.023                     | 1.033              | 61.577             | 0.0163                      |
| Nogo Receptor                                                                                                                                                    | 2.019            | 0.036                | 0.018                     | 1.025              | 61.577             | 0.0175                      |
| Angiogenin                                                                                                                                                       | 2.019            | 0.066                | 0.033                     | 1.047              | 61.577             | 0.0175                      |
| Renin                                                                                                                                                            | 1.988            | 0.064                | 0.032                     | 1.045              | 61.577             | 0.0191                      |
| RANTES                                                                                                                                                           | 1.968            | 0.129                | 0.066                     | 1.094              | 61.577             | 0.0202                      |
| Corticotropin-lipotropin                                                                                                                                         | -1.954           | -0.097               | 0.050                     | 0.935              | 26.590             | 0.0210                      |
| RET                                                                                                                                                              | 1.909            | 0.040                | 0.021                     | 1.028              | 61.577             | 0.0238                      |
| HCC-1                                                                                                                                                            | 1.907            | 0.039                | 0.020                     | 1.027              | 61.577             | 0.0239                      |
| PDGF-BB                                                                                                                                                          | 1.888            | 0.132                | 0.070                     | 1.096              | 61.577             | 0.0253                      |
| MDM2                                                                                                                                                             | 1.857            | 0.028                | 0.015                     | 1.019              | 61.577             | 0.0275                      |
| PF-4                                                                                                                                                             | 1.828            | 0.088                | 0.048                     | 1.063              | 61.577             | 0.0297                      |
| GDF2                                                                                                                                                             | 1.817            | 0.046                | 0.026                     | 1.033              | 61.577             | 0.0306                      |
| Trypsin                                                                                                                                                          | 1.798            | 0.050                | 0.028                     | 1.035              | 61.577             | 0.0323                      |
| SEPR                                                                                                                                                             | 1.726            | 0.030                | 0.017                     | 1.021              | 73.990             | 0.0393                      |
| CD27                                                                                                                                                             | 1.725            | 0.064                | 0.037                     | 1.046              | 73.990             | 0.0394                      |
| MMP-1                                                                                                                                                            | 1.705            | 0.060                | 0.035                     | 1.042              | 73.990             | 0.0416                      |
| NG36                                                                                                                                                             | 1.704            | 0.033                | 0.019                     | 1.023              | 73.990             | 0.0417                      |
| Histone H1.2                                                                                                                                                     | -1.694           | -0.090               | 0.053                     | 0.940              | 26.590             | 0.0428                      |
| IL-1Ra                                                                                                                                                           | -1.672           | -0.068               | 0.041                     | 0.954              | 26.590             | 0.0454                      |
| BDNF                                                                                                                                                             | 1.640            | 0.042                | 0.025                     | 1.029              | 82.725             | 0.0494                      |
| ATPO                                                                                                                                                             | 1.638            | 0.097                | 0.059                     | 1.069              | 82.725             | 0.0496                      |



**Table S15: Confusion matrix of the 3 models trained to predict moderate to severe apnea (OAHl  $\geq 15$ ) vs controls/mild (OAHl  $< 15$ )**

Model1 ; includes somascan proteins , age, gender and BMI

| Predicted |    | TRUE |   |
|-----------|----|------|---|
|           |    | 0    | 1 |
| 0         | 65 | 22   |   |
| 1         | 15 | 62   |   |

Model2; Includes only somascan proteins

| Predicted |    | TRUE |   |
|-----------|----|------|---|
|           |    | 0    | 1 |
| 0         | 63 | 24   |   |
| 1         | 15 | 62   |   |

Model3 includes only age, gender and BMI

| Predicted |    | TRUE |   |
|-----------|----|------|---|
|           |    | 0    | 1 |
| 0         | 58 | 29   |   |
| 1         | 23 | 54   |   |

Table S16

| <b>Table S16: Full list of association of protein variables with age of sample (years from sample draw to assay)</b> |              |                |          |                |                  |          |                                                                  |                |               |               |
|----------------------------------------------------------------------------------------------------------------------|--------------|----------------|----------|----------------|------------------|----------|------------------------------------------------------------------|----------------|---------------|---------------|
| <b>vars</b>                                                                                                          | <b>logFC</b> | <b>AveExpr</b> | <b>t</b> | <b>P.Value</b> | <b>adj.P.Val</b> | <b>B</b> | <b>TargetFullName</b>                                            | <b>UniProt</b> | <b>GeneID</b> | <b>Symbol</b> |
| Midkine                                                                                                              | 4.716        | 14.305         | 16.437   | 1.34E-51       | 1.74E-48         | 106.334  | Midkine                                                          | P21741         | 4192          | MDK           |
| B7-H2                                                                                                                | -2.144       | 11.665         | -12.455  | 2.6E-32        | 1.68E-29         | 62.541   | ICOS ligand                                                      | O75144         | 23308         | ICOSLG        |
| Azurocidin                                                                                                           | -3.291       | 9.250          | -12.395  | 4.79E-32       | 2.07E-29         | 61.938   | Azurocidin                                                       | P20160         | 566           | AZU1          |
| Proteinase-3                                                                                                         | -3.431       | 13.274         | -11.416  | 8.36E-28       | 2.71E-25         | 52.319   | Myeloblastin                                                     | P24158         | 5657          | PRTN3         |
| BARK1                                                                                                                | -2.301       | 11.592         | -11.043  | 2.99E-26       | 7.76E-24         | 48.799   | beta-adrenergic<br>receptor kinase 1                             | P25098         | 156           | ADRBK1        |
| MEK1                                                                                                                 | -0.711       | 9.362          | -10.482  | 5.57E-24       | 1.2E-21          | 43.657   | Dual specificity<br>mitogen-activated<br>protein kinase kinase 1 | Q02750         | 5604          | MAP2K1        |
| HSP70 protein 8                                                                                                      | -1.324       | 11.370         | -10.146  | 1.15E-22       | 2.14E-20         | 40.678   | Heat shock cognate 71<br>kDa protein                             | P11142         | 3312          | HSPA8         |
| alpha-1-antichymotrypsin<br>complex                                                                                  | -2.263       | 13.407         | -10.022  | 3.49E-22       | 5.65E-20         | 39.592   | Alpha-1-<br>antichymotrypsin<br>complex                          | P01011         | 12            | SERPINA3      |
| Elastase                                                                                                             | -1.484       | 8.170          | -9.958   | 6.14E-22       | 8.85E-20         | 39.035   | Neutrophil elastase                                              | P08246         | 1991          | ELANE         |
| COX-2                                                                                                                | -1.436       | 10.300         | -9.843   | 1.69E-21       | 2.19E-19         | 38.043   | Prostaglandin G/H<br>synthase 2                                  | P35354         | 5743          | PTGS2         |
| SP-D                                                                                                                 | -4.081       | 14.396         | -9.803   | 2.37E-21       | 2.8E-19          | 37.708   | Pulmonary surfactant-<br>associated protein D                    | P35247         | 6441          | SFTPD         |
| IMDH1                                                                                                                | -3.250       | 12.001         | -9.670   | 7.52E-21       | 7.74E-19         | 36.575   | Inosine-5'-<br>monophosphate<br>dehydrogenase 1                  | P20839         | 3614          | IMPDH1        |
| Myeloperoxidase                                                                                                      | -2.481       | 15.055         | -9.667   | 7.76E-21       | 7.74E-19         | 36.544   | Myeloperoxidase                                                  | P05164         | 4353          | MPO           |
| Lactoferrin                                                                                                          | -3.162       | 14.858         | -9.613   | 1.23E-20       | 1.14E-18         | 36.089   | Lactotransferrin                                                 | P02788         | 4057          | LTF           |
| hnRNP A2/B1                                                                                                          | -2.417       | 12.616         | -9.563   | 1.9E-20        | 1.64E-18         | 35.666   | Heterogeneous nuclear<br>ribonucleoproteins<br>A2/B1             | P22626         | 3181          | HNRNPA2<br>B1 |
| S100A12                                                                                                              | -1.717       | 10.709         | -9.215   | 3.56E-19       | 2.88E-17         | 32.790   | Protein S100-A12                                                 | P80511         | 6283          | S100A12       |
| LIGHT                                                                                                                | -1.667       | 11.395         | -8.997   | 2.15E-18       | 1.64E-16         | 31.027   | Tumor necrosis factor<br>ligand superfamily<br>member 14         | O43557         | 8740          | TNFSF14       |

Table S16

| vars                            | logFC  | AveExpr | t      | P.Value  | adj.P.Val | B      | TargetFullName                              | UniProt | GeneID | Symbol  |
|---------------------------------|--------|---------|--------|----------|-----------|--------|---------------------------------------------|---------|--------|---------|
| MMP-8                           | -2.747 | 13.083  | -8.531 | 8.93E-17 | 6.44E-15  | 27.373 | Neutrophil collagenase                      | P22894  | 4317   | MMP8    |
| OLR1                            | -2.361 | 9.307   | -8.484 | 1.29E-16 | 8.78E-15  | 27.016 | Oxidized low-density lipoprotein receptor 1 | P78380  | 4973   | OLR1    |
| Dynactin subunit 2              | -0.591 | 11.041  | -8.470 | 1.44E-16 | 9.34E-15  | 26.906 | Dynactin subunit 2                          | Q13561  | 10540  | DCTN2   |
| RS7                             | -1.825 | 11.181  | -8.302 | 5.27E-16 | 3.26E-14  | 25.635 | 40S ribosomal protein S7                    | P62081  | 6201   | RPS7    |
| AIF1                            | -0.691 | 12.646  | -8.187 | 1.26E-15 | 7.43E-14  | 24.782 | Allograft inflammatory factor 1             | P55008  | 199    | AIF1    |
| Alpha enolase                   | -1.871 | 13.824  | -8.044 | 3.7E-15  | 2.09E-13  | 23.728 | Alpha-enolase                               | P06733  | 2023   | ENO1    |
| UBC9                            | -1.575 | 10.833  | -8.036 | 3.93E-15 | 2.13E-13  | 23.669 | SUMO-conjugating enzyme UBC9                | P63279  | 7329   | UBE2I   |
| hnRNP A/B                       | -1.603 | 10.355  | -8.028 | 4.18E-15 | 2.17E-13  | 23.610 | Heterogeneous nuclear ribonucleoprotein A/B | Q99729  | 3182   | HNRNPAB |
| 14-3-3 protein beta/alpha       | -1.653 | 12.707  | -7.987 | 5.66E-15 | 2.82E-13  | 23.313 | 14-3-3 protein beta/alpha                   | P31946  | 7529   | YWHAB   |
| GP114                           | -0.670 | 9.914   | -7.889 | 1.17E-14 | 5.6E-13   | 22.606 | Adhesion G-protein coupled receptor G5      | Q8IZF4  | 221188 | ADGRG5  |
| IL-2                            | -1.211 | 11.735  | -7.880 | 1.25E-14 | 5.78E-13  | 22.540 | Interleukin-2                               | P60568  | 3558   | IL2     |
| Nucleoside diphosphate kinase A | -0.894 | 11.049  | -7.825 | 1.87E-14 | 8.36E-13  | 22.145 | Nucleoside diphosphate kinase A             | P15531  | 4830   | NME1    |
| Lipocalin 2                     | -1.571 | 7.698   | -7.790 | 2.42E-14 | 1.05E-12  | 21.893 | Neutrophil gelatinase-associated lipocalin  | P80188  | 3934   | LCN2    |
| MEPE                            | -0.785 | 8.727   | -7.778 | 2.65E-14 | 1.11E-12  | 21.806 | Matrix extracellular phosphoglycoprotein    | Q9NQ76  | 56955  | MEPE    |
| FGF-12                          | -0.669 | 8.604   | -7.751 | 3.2E-14  | 1.3E-12   | 21.620 | Fibroblast growth factor 12                 | P61328  | 2257   | FGF12   |
| TBP                             | -0.849 | 9.632   | -7.726 | 3.83E-14 | 1.51E-12  | 21.444 | TATA-box-binding protein                    | P20226  | 6908   | TBP     |
| HXK2                            | -2.359 | 10.755  | -7.685 | 5.15E-14 | 1.97E-12  | 21.155 | Hexokinase-2                                | P52789  | 3099   | HK2     |
| PHI                             | -1.407 | 9.351   | -7.595 | 9.87E-14 | 3.66E-12  | 20.520 | Glucose-6-phosphate isomerase               | P06744  | 2821   | GPI     |

Table S16

| vars         | logFC  | AveExpr | t      | P.Value  | adj.P.Val | B      | TargetFullName                               | UniProt                                                                  | GeneID     | Symbol                                                      |
|--------------|--------|---------|--------|----------|-----------|--------|----------------------------------------------|--------------------------------------------------------------------------|------------|-------------------------------------------------------------|
| ARG11        | -1.963 | 11.732  | -7.544 | 1.41E-13 | 5.09E-12  | 20.169 | Arginase-1                                   | P05089                                                                   | 383        | ARG1                                                        |
| eIF-5        | -1.392 | 11.058  | -7.486 | 2.14E-13 | 7.37E-12  | 19.765 | Eukaryotic translation initiation factor 5   | P55010                                                                   | 1983       | EIF5                                                        |
| ERK-1        | -1.256 | 9.462   | -7.484 | 2.16E-13 | 7.37E-12  | 19.756 | Mitogen-activated protein kinase 3           | P27361                                                                   | 5595       | MAPK3                                                       |
| IL-10 Rb     | -0.441 | 11.305  | -7.405 | 3.77E-13 | 1.25E-11  | 19.211 | Interleukin-10 receptor subunit beta         | Q08334                                                                   | 3588       | IL10RB                                                      |
| SUMO3        | -1.896 | 10.802  | -7.386 | 4.29E-13 | 1.39E-11  | 19.086 | Small ubiquitin-related modifier 3           | P55854                                                                   | 6613       | SUMO3                                                       |
| 14-3-3       | -0.790 | 10.510  | -7.341 | 5.87E-13 | 1.86E-11  | 18.780 | 14-3-3 protein family                        | P31946,<br>P62258,<br>P61981,<br>Q04917,<br>P27348,<br>P63104,<br>P31947 | 7529, 7531 | YWHAB,Y<br>WHAE,YW<br>HAG,YWH<br>AH,YWHA<br>Q,YWHAZ,<br>SFN |
| BPI          | -3.185 | 12.767  | -7.303 | 7.67E-13 | 2.37E-11  | 18.519 | Bactericidal permeability-increasing protein | P17213                                                                   | 671        | BPI                                                         |
| PTN          | 0.811  | 10.257  | 7.214  | 1.41E-12 | 4.26E-11  | 17.925 | Pleiotrophin                                 | P21246                                                                   | 5764       | PTN                                                         |
| PDXK         | -0.982 | 11.505  | -7.196 | 1.6E-12  | 4.72E-11  | 17.802 | Pyridoxal kinase                             | O00764                                                                   | 8566       | PDXK                                                        |
| ASGR1        | -0.782 | 10.420  | -7.129 | 2.51E-12 | 7.24E-11  | 17.363 | Asialoglycoprotein receptor 1                | P07306                                                                   | 432        | ASGR1                                                       |
| TCTP         | -1.862 | 12.432  | -7.123 | 2.63E-12 | 7.41E-11  | 17.319 | Translationally-controlled tumor protein     | P13693                                                                   | 7178       | TPT1                                                        |
| IFN-lambda 1 | -0.857 | 8.063   | -7.022 | 5.16E-12 | 1.43E-10  | 16.661 | Interferon lambda-1                          | Q8IU54                                                                   | 282618     | IFNL1                                                       |
| DLL4         | -1.129 | 8.297   | -7.009 | 5.65E-12 | 1.53E-10  | 16.574 | Delta-like protein 4                         | Q9NR61                                                                   | 54567      | DLL4                                                        |
| UFC1         | -1.132 | 13.502  | -6.994 | 6.26E-12 | 1.66E-10  | 16.474 | Ubiquitin-fold modifier-conjugating enzyme 1 | Q9Y3C8                                                                   | 51506      | UFC1                                                        |
| H31          | -1.526 | 11.141  | -6.988 | 6.5E-12  | 1.69E-10  | 16.438 | Histone H3.1                                 | P68431                                                                   | 8350       | HIST1H3A                                                    |
| Caspase-10   | -0.613 | 13.188  | -6.946 | 8.57E-12 | 2.18E-10  | 16.169 | Caspase-10                                   | Q92851                                                                   | 843        | CASP10                                                      |

Table S16

| vars                         | logFC  | AveExpr | t      | P.Value  | adj.P.Val | B      | TargetFullName                                       | UniProt                    | GeneID     | Symbol            |
|------------------------------|--------|---------|--------|----------|-----------|--------|------------------------------------------------------|----------------------------|------------|-------------------|
| Protein disulfide-isomerase  | -0.709 | 8.650   | -6.823 | 1.93E-11 | 4.82E-10  | 15.378 | Protein disulfide-isomerase                          | P07237                     | 5034       | P4HB              |
| Glutathione S-transferase Pi | -0.466 | 9.942   | -6.702 | 4.22E-11 | 1.03E-09  | 14.618 | Glutathione S-transferase P                          | P09211                     | 2950       | GSTP1             |
| DEAD-box protein 19B         | -1.263 | 11.218  | -6.622 | 7.06E-11 | 1.69E-09  | 14.118 | ATP-dependent RNA helicase DDX19B                    | Q9UMR2                     | 11269      | DDX19B            |
| HINT1                        | -1.360 | 11.218  | -6.612 | 7.52E-11 | 1.77E-09  | 14.057 | Histidine triad nucleotide-binding protein 1         | P49773                     | 3094       | HINT1             |
| PKB beta                     | -0.492 | 9.321   | -6.574 | 9.58E-11 | 2.22E-09  | 13.821 | RAC-beta serine/threonine-protein kinase             | P31751                     | 208        | AKT2              |
| Enterokinase                 | -0.677 | 8.853   | -6.560 | 1.04E-10 | 2.38E-09  | 13.737 | Enteropeptidase                                      | P98073                     | 5651       | TMPRSS15          |
| H2A3                         | -2.782 | 12.392  | -6.527 | 1.29E-10 | 2.88E-09  | 13.533 | Histone H2A type 3                                   | Q7L7L0                     |            | HIST3H2A          |
| Sorting nexin 4              | -1.137 | 11.270  | -6.484 | 1.68E-10 | 3.69E-09  | 13.276 | Sorting nexin-4                                      | O95219                     | 8723       | SNX4              |
| Ku70                         | -0.852 | 8.952   | -6.448 | 2.1E-10  | 4.55E-09  | 13.057 | X-ray repair cross-complementing protein 6           | P12956                     | 2547       | XRCC6             |
| SHP-2                        | -1.854 | 12.535  | -6.390 | 3.02E-10 | 6.42E-09  | 12.707 | Tyrosine-protein phosphatase non-receptor type 11    | Q06124                     | 5781       | PTPN11            |
| IL-16                        | -0.400 | 8.924   | -6.386 | 3.1E-10  | 6.48E-09  | 12.681 | Interleukin-16                                       | Q14005                     | 3603       | IL16              |
| PKB a/b/g                    | -0.536 | 10.945  | -6.360 | 3.63E-10 | 7.47E-09  | 12.529 | RAC-alpha/beta/gamma serine/threonine-protein kinase | P31749<br>P31751<br>Q9Y243 | 207 208 10 | AKT1 AKT2<br>AKT3 |
| HCK                          | -0.468 | 8.314   | -6.341 | 4.08E-10 | 8.26E-09  | 12.416 | Tyrosine-protein kinase<br>HCK                       | P08631                     | 3055       | HCK               |
| CFC1                         | -0.632 | 11.681  | -6.301 | 5.22E-10 | 1.04E-08  | 12.176 | Cryptic protein                                      | P0CG37                     | 55997      | CFC1              |
| IMB1                         | -2.164 | 13.273  | -6.253 | 7E-10    | 1.38E-08  | 11.891 | Importin subunit beta-1                              | Q14974                     | 3837       | KPNB1             |

Table S16

| vars                      | logFC  | AveExpr | t      | P.Value  | adj.P.Val | B      | TargetFullName                                           | UniProt          | GeneID    | Symbol            |
|---------------------------|--------|---------|--------|----------|-----------|--------|----------------------------------------------------------|------------------|-----------|-------------------|
| DRG-1                     | -2.217 | 9.304   | -6.203 | 9.44E-10 | 1.83E-08  | 11.602 | Vacuolar protein sorting-associated protein VTA1 homolog | Q9NP79           | 51534     | VTA1              |
| sICAM-2                   | -0.495 | 11.394  | -6.179 | 1.1E-09  | 2.09E-08  | 11.457 | Intercellular adhesion molecule 2                        | P13598           | 3384      | ICAM2             |
| annexin I                 | -1.631 | 11.343  | -6.155 | 1.26E-09 | 2.37E-08  | 11.320 | Annexin A1                                               | P04083           | 301       | ANXA1             |
| FGF-17                    | -0.485 | 8.626   | -6.152 | 1.28E-09 | 2.38E-08  | 11.303 | Fibroblast growth factor 17                              | O60258           | 8822      | FGF17             |
| Caspase-3                 | -1.622 | 12.620  | -6.133 | 1.44E-09 | 2.63E-08  | 11.192 | Caspase-3                                                | P42574           | 836       | CASP3             |
| RSK-like protein kinase   | -0.761 | 7.795   | -6.126 | 1.5E-09  | 2.71E-08  | 11.151 | Ribosomal protein S6 kinase alpha-5                      | O75582           | 9252      | RPS6KA5           |
| PSME1                     | -0.625 | 11.251  | -6.091 | 1.85E-09 | 3.29E-08  | 10.950 | Proteasome activator complex subunit 1                   | Q06323           | 5720      | PSME1             |
| Triosephosphate isomerase | -1.381 | 12.018  | -6.080 | 1.97E-09 | 3.46E-08  | 10.888 | Triosephosphate isomerase                                | P60174           | 7167      | TPI1              |
| CDC37                     | -0.740 | 9.104   | -6.059 | 2.24E-09 | 3.87E-08  | 10.766 | Hsp90 co-chaperone Cdc37                                 | Q16543           | 11140     | CDC37             |
| RBM39                     | -0.852 | 9.799   | -6.046 | 2.42E-09 | 4.12E-08  | 10.691 | RNA-binding protein 39                                   | Q14498           | 9584      | RBM39             |
| UFM1                      | -1.815 | 12.728  | -5.989 | 3.38E-09 | 5.69E-08  | 10.367 | Ubiquitin-fold modifier 1                                | P61960           | 51569     | UFM1              |
| ARI3A                     | -0.834 | 9.475   | -5.983 | 3.49E-09 | 5.8E-08   | 10.336 | AT-rich interactive domain-containing protein 3A         | Q99856           | 1820      | ARID3A            |
| NSF1C                     | -2.161 | 10.935  | -5.963 | 3.92E-09 | 6.44E-08  | 10.223 | NSFL1 cofactor p47                                       | Q9UNZ2           | 55968     | NSFL1C            |
| CRK                       | -1.037 | 13.216  | -5.955 | 4.12E-09 | 6.68E-08  | 10.175 | Adapter molecule crk                                     | P46108           | 1398      | CRK               |
| PDPK1                     | -1.720 | 9.764   | -5.943 | 4.4E-09  | 6.97E-08  | 10.112 | 3-phosphoinositide-dependent protein kinase 1            | O15530           | 5170      | PDPK1             |
| CK2-A1:B                  | -1.865 | 12.307  | -5.943 | 4.41E-09 | 6.97E-08  | 10.110 | Casein kinase II 2-alpha:2-beta heterotetramer           | P68400<br>P67870 | 1457 1460 | CSNK2A1<br>CSNK2B |

Table S16

| vars             | logFC  | AveExpr | t      | P.Value  | adj.P.Val | B      | TargetFullName                                     | UniProt          | GeneID    | Symbol         |
|------------------|--------|---------|--------|----------|-----------|--------|----------------------------------------------------|------------------|-----------|----------------|
| CAPG             | -1.117 | 10.442  | -5.928 | 4.82E-09 | 7.54E-08  | 10.023 | Macrophage-capping protein                         | P40121           | 822       | CAPG           |
| CNTF             | -0.452 | 8.189   | -5.911 | 5.32E-09 | 8.21E-08  | 9.928  | Ciliary neurotrophic factor                        | P26441           | 1270      | CNTF           |
| PGRP-S           | -1.866 | 10.383  | -5.885 | 6.17E-09 | 9.41E-08  | 9.786  | Peptidoglycan recognition protein 1                | O75594           | 8993      | PGLYRP1        |
| CSK              | -1.771 | 10.495  | -5.861 | 7.07E-09 | 1.07E-07  | 9.653  | Tyrosine-protein kinase CSK                        | P41240           | 1445      | CSK            |
| Transketolase    | -1.530 | 14.240  | -5.852 | 7.45E-09 | 1.11E-07  | 9.603  | Transketolase                                      | P29401           | 7086      | TKT            |
| SLPI             | 0.668  | 14.786  | 5.844  | 7.82E-09 | 1.15E-07  | 9.555  | Antileukoproteinase                                | P03973           | 6590      | SLPI           |
| GSK-3 alpha/beta | -0.983 | 11.578  | -5.838 | 8.09E-09 | 1.18E-07  | 9.523  | Glycogen synthase kinase-3 alpha/beta              | P49840<br>P49841 | 2931 2932 | GSK3A<br>GSK3B |
| CDK8/cyclin C    | -0.652 | 10.224  | -5.828 | 8.57E-09 | 1.23E-07  | 9.468  | Cyclin-dependent kinase 8:Cyclin-C complex         | P49336<br>P24863 | 1024 892  | CDK8<br>CCNC   |
| ERBB4            | -0.580 | 8.025   | -5.827 | 8.6E-09  | 1.23E-07  | 9.464  | Receptor tyrosine-protein kinase erbB-4            | Q15303           | 2066      | ERBB4          |
| Cyclophilin A    | -1.389 | 15.996  | -5.813 | 9.32E-09 | 1.31E-07  | 9.386  | Peptidyl-prolyl cis-trans isomerase A              | P62937           | 5478      | PPIA           |
| IF4G2            | -1.655 | 10.539  | -5.798 | 1.01E-08 | 1.41E-07  | 9.305  | Eukaryotic translation initiation factor 4 gamma 2 | P78344           | 1982      | EIF4G2         |
| JNK2             | -0.633 | 11.901  | -5.790 | 1.06E-08 | 1.47E-07  | 9.258  | Mitogen-activated protein kinase 9                 | P45984           | 5601      | MAPK9          |
| IL-8             | -1.480 | 10.776  | -5.757 | 1.28E-08 | 1.75E-07  | 9.080  | Interleukin-8                                      | P10145           | 3576      | CXCL8          |
| PEX5             | -0.824 | 9.797   | -5.752 | 1.31E-08 | 1.78E-07  | 9.054  | Peroxisomal targeting signal 1 receptor            | P50542           | 5830      | PEX5           |
| a-Synuclein      | -2.186 | 7.548   | -5.739 | 1.42E-08 | 1.9E-07   | 8.979  | Alpha-synuclein                                    | P37840           | 6622      | SNCA           |
| UBE2N            | -1.964 | 11.116  | -5.720 | 1.58E-08 | 2.09E-07  | 8.876  | Ubiquitin-conjugating enzyme E2 N                  | P61088           | 7334      | UBE2N          |
| HDGR2            | -0.444 | 10.108  | -5.705 | 1.71E-08 | 2.24E-07  | 8.799  | Hepatoma-derived growth factor-related protein 2   | Q7Z4V5           | 84717     | HDGFRP2        |

Table S16

| vars    | logFC  | AveExpr | t      | P.Value  | adj.P.Val | B     | TargetFullName                                                 | UniProt | GeneID | Symbol   |
|---------|--------|---------|--------|----------|-----------|-------|----------------------------------------------------------------|---------|--------|----------|
| STAT3   | -0.972 | 9.422   | -5.688 | 1.89E-08 | 2.45E-07  | 8.703 | Signal transducer and activator of transcription 3             | P40763  | 6774   | STAT3    |
| TRY3    | -0.463 | 9.622   | -5.683 | 1.94E-08 | 2.49E-07  | 8.678 | Trypsin-3                                                      | P35030  | 5646   | PRSS3    |
| PTK6    | -0.883 | 8.851   | -5.670 | 2.09E-08 | 2.66E-07  | 8.606 | Protein-tyrosine kinase 6                                      | Q13882  | 5753   | PTK6     |
| EPO-R   | -0.586 | 8.862   | -5.666 | 2.13E-08 | 2.68E-07  | 8.588 | Erythropoietin receptor                                        | P19235  | 2057   | EPOR     |
| RPS6KA3 | -1.163 | 11.027  | -5.662 | 2.18E-08 | 2.72E-07  | 8.565 | Ribosomal protein S6 kinase alpha-3                            | P51812  | 6197   | RPS6KA3  |
| 3HIDH   | -1.211 | 10.248  | -5.657 | 2.25E-08 | 2.78E-07  | 8.537 | 3-hydroxyisobutyrate dehydrogenase, mitochondrial              | P31937  | 11112  | HIBADH   |
| CBG     | -0.583 | 10.272  | -5.635 | 2.53E-08 | 3.1E-07   | 8.422 | Corticosteroid-binding globulin                                | P08185  | 866    | SERPINA6 |
| FAK1    | -0.811 | 8.767   | -5.632 | 2.57E-08 | 3.11E-07  | 8.406 | Focal adhesion kinase 1                                        | Q05397  | 5747   | PTK2     |
| SHC1    | -1.232 | 9.242   | -5.631 | 2.59E-08 | 3.11E-07  | 8.399 | SHC-transforming protein 1                                     | P29353  | 6464   | SHC1     |
| AN32B   | 1.141  | 8.049   | 5.583  | 3.39E-08 | 4.03E-07  | 8.141 | Acidic leucine-rich nuclear phosphoprotein 32 family member B  | Q92688  | 10541  | ANP32B   |
| ADAM12  | -0.539 | 10.933  | -5.573 | 3.57E-08 | 4.21E-07  | 8.090 | Disintegrin and metalloproteinase domain-containing protein 12 | O43184  | 8038   | ADAM12   |
| KIRR3   | -0.453 | 8.800   | -5.555 | 3.94E-08 | 4.6E-07   | 7.997 | Kin of IRRE-like protein 3                                     | Q8IZU9  | 84623  | KIRREL3  |
| sTie-2  | -0.669 | 11.449  | -5.499 | 5.36E-08 | 6.2E-07   | 7.700 | Angiopoietin-1 receptor, soluble                               | Q02763  | 7010   | TEK      |



Table S16

| vars                      | logFC  | AveExpr | t      | P.Value  | adj.P.Val | B     | TargetFullName                                             | UniProt | GeneID | Symbol   |
|---------------------------|--------|---------|--------|----------|-----------|-------|------------------------------------------------------------|---------|--------|----------|
| PAFAH beta subunit        | -1.110 | 11.928  | -5.471 | 6.23E-08 | 7.12E-07  | 7.555 | Platelet-activating factor acetylhydrolase IB subunit beta | P68402  | 5049   | PAFAH1B2 |
| METAP1                    | -1.292 | 10.532  | -5.470 | 6.25E-08 | 7.12E-07  | 7.550 | Methionine aminopeptidase 1                                | P53582  | 23173  | METAP1   |
| M2-PK                     | -1.242 | 12.668  | -5.441 | 7.31E-08 | 8.25E-07  | 7.400 | Pyruvate kinase PKM                                        | P14618  | 5315   | PKM2     |
| eIF-4H                    | -1.774 | 10.603  | -5.435 | 7.56E-08 | 8.45E-07  | 7.368 | Eukaryotic translation initiation factor 4H                | Q15056  | 7458   | EIF4H    |
| Phosphoglycerate mutase 1 | -3.094 | 12.494  | -5.415 | 8.42E-08 | 9.34E-07  | 7.264 | Phosphoglycerate mutase 1                                  | P18669  | 5223   | PGAM1    |
| NAGK                      | -0.875 | 9.564   | -5.412 | 8.56E-08 | 9.41E-07  | 7.248 | N-acetyl-D-glucosamine kinase                              | Q9UJ70  | 55577  | NAGK     |
| NUDC3                     | -1.037 | 9.083   | -5.390 | 9.66E-08 | 1.05E-06  | 7.132 | NudC domain-containing protein 3                           | Q8IVD9  | 23386  | NUDCD3   |
| STK16                     | -0.578 | 11.897  | -5.387 | 9.77E-08 | 1.06E-06  | 7.121 | Serine/threonine-protein kinase 16                         | O75716  | 8576   | STK16    |
| PRKACA                    | -1.248 | 12.267  | -5.359 | 1.13E-07 | 1.21E-06  | 6.979 | cAMP-dependent protein kinase catalytic subunit alpha      | P17612  | 5566   | PRKACA   |
| Coagulation Factor IX     | 0.660  | 13.357  | 5.302  | 1.53E-07 | 1.63E-06  | 6.687 | Coagulation factor IX                                      | P00740  | 2158   | F9       |
| SNAA                      | -1.739 | 10.983  | -5.276 | 1.76E-07 | 1.86E-06  | 6.556 | Alpha-soluble NSF attachment protein                       | P54920  | 8775   | NAPA     |
| resistin                  | -0.748 | 11.187  | -5.250 | 2.02E-07 | 2.11E-06  | 6.423 | Resistin                                                   | Q9HD89  | 56729  | RETN     |
| TNF-a                     | -0.515 | 9.358   | -5.219 | 2.38E-07 | 2.47E-06  | 6.267 | Tumor necrosis factor                                      | P01375  | 7124   | TNF      |
| MAPKAPK3                  | -0.518 | 10.116  | -5.188 | 2.79E-07 | 2.87E-06  | 6.114 | MAP kinase-activated protein kinase 3                      | Q16644  | 7867   | MAPKAPK3 |
| IFN-aA                    | -0.536 | 7.586   | -5.184 | 2.84E-07 | 2.9E-06   | 6.095 | Interferon alpha-2                                         | P01563  | 3440   | IFNA2    |
| Carbonic anhydrase VII    | -0.628 | 9.163   | -5.133 | 3.69E-07 | 3.74E-06  | 5.846 | Carbonic anhydrase 7                                       | P43166  | 766    | CA7      |
| IL-20                     | -0.439 | 9.086   | -5.108 | 4.21E-07 | 4.23E-06  | 5.719 | Interleukin-20                                             | Q9NYY1  | 50604  | IL20     |
| Transgelin-2              | -0.887 | 12.648  | -5.074 | 5E-07    | 4.98E-06  | 5.554 | Transgelin-2                                               | P37802  | 8407   | TAGLN2   |
| Nidogen                   | 0.695  | 12.748  | 5.059  | 5.39E-07 | 5.33E-06  | 5.482 | Nidogen-1                                                  | P14543  | 4811   | NID1     |

Table S16

| vars                   | logFC  | AveExpr | t      | P.Value  | adj.P.Val | B     | TargetFullName                                                    | UniProt | GeneID | Symbol |
|------------------------|--------|---------|--------|----------|-----------|-------|-------------------------------------------------------------------|---------|--------|--------|
| STAT1                  | -1.128 | 10.699  | -5.039 | 5.95E-07 | 5.84E-06  | 5.387 | Signal transducer and activator of transcription 1-alpha/beta     | P42224  | 6772   | STAT1  |
| MED-1                  | 0.543  | 16.429  | 5.037  | 6.01E-07 | 5.86E-06  | 5.378 | Mediator of RNA polymerase II transcription subunit 1             | Q15648  | 5469   | MED1   |
| YES                    | -0.620 | 10.125  | -5.031 | 6.21E-07 | 5.99E-06  | 5.346 | Tyrosine-protein kinase Yes                                       | P07947  | 7525   | YES1   |
| Coagulation Factor VII | 0.696  | 9.378   | 5.030  | 6.24E-07 | 5.99E-06  | 5.342 | Coagulation factor VII                                            | P08709  | 2155   | F7     |
| CAMK2A                 | -0.665 | 9.443   | -5.022 | 6.51E-07 | 6.2E-06   | 5.301 | Calcium/calmodulin-dependent protein kinase type II subunit alpha | Q9UQM7  | 815    | CAMK2A |
| Ubiquitin              | -1.119 | 14.706  | -5.016 | 6.7E-07  | 6.34E-06  | 5.273 | Ubiquitin                                                         | P62979  | 6233   | RPS27A |
| SBDS                   | -1.184 | 11.705  | -4.995 | 7.45E-07 | 7E-06     | 5.172 | Ribosome maturation protein SBDS                                  | Q9Y3A5  | 51119  | SBDS   |
| KPCI                   | -0.730 | 11.055  | -4.984 | 7.87E-07 | 7.34E-06  | 5.119 | Protein kinase C iota type                                        | P41743  | 5584   | PRKCI  |
| S100A4                 | -1.363 | 11.359  | -4.977 | 8.12E-07 | 7.52E-06  | 5.090 | Protein S100-A4                                                   | P26447  | 6275   | S100A4 |
| HGF                    | -0.815 | 11.305  | -4.967 | 8.56E-07 | 7.87E-06  | 5.039 | Hepatocyte growth factor                                          | P14210  | 3082   | HGF    |
| Ubiquitin+1            | -1.404 | 10.088  | -4.952 | 9.22E-07 | 8.42E-06  | 4.968 | Ubiquitin+1, truncated mutation for UbB                           | P62979  | 6233   | RPS27A |
| GRB2 adapter protein   | -1.966 | 9.992   | -4.949 | 9.33E-07 | 8.43E-06  | 4.956 | Growth factor receptor-bound protein 2                            | P62993  | 2885   | GRB2   |
| PA2G4                  | -1.452 | 9.606   | -4.949 | 9.36E-07 | 8.43E-06  | 4.953 | Proliferation-associated protein 2G4                              | Q9UQ80  | 5036   | PA2G4  |

Table S16

| vars                    | logFC  | AveExpr | t      | P.Value  | adj.P.Val | B     | TargetFullName                                                   | UniProt | GeneID | Symbol   |
|-------------------------|--------|---------|--------|----------|-----------|-------|------------------------------------------------------------------|---------|--------|----------|
| GOT1                    | -0.565 | 12.101  | -4.940 | 9.76E-07 | 8.73E-06  | 4.914 | Aspartate aminotransferase, cytoplasmic                          | P17174  | 2805   | GOT1     |
| 4EBP2                   | -0.677 | 10.380  | -4.934 | 1.01E-06 | 8.96E-06  | 4.881 | Eukaryotic translation initiation factor 4E-binding protein 2    | Q13542  | 1979   | EIF4EBP2 |
| DRR1                    | -0.460 | 8.509   | -4.925 | 1.05E-06 | 9.28E-06  | 4.842 | Protein FAM107A                                                  | O95990  | 11170  | FAM107A  |
| Cardiotrophin-1         | -0.444 | 10.093  | -4.911 | 1.13E-06 | 9.87E-06  | 4.777 | Cardiotrophin-1                                                  | Q16619  | 1489   | CTF1     |
| Carbonic anhydrase XIII | -1.897 | 12.261  | -4.908 | 1.14E-06 | 9.94E-06  | 4.763 | Carbonic anhydrase 13                                            | Q8N1Q1  | 377677 | CA13     |
| PTP-1C                  | -1.118 | 12.147  | -4.897 | 1.21E-06 | 1.04E-05  | 4.710 | Tyrosine-protein phosphatase non-receptor type 6                 | P29350  | 5777   | PTPN6    |
| CATC                    | -0.453 | 10.060  | -4.886 | 1.27E-06 | 1.09E-05  | 4.659 | Dipeptidyl peptidase 1                                           | P53634  | 1075   | CTSC     |
| TGF-b3                  | -0.417 | 9.620   | -4.879 | 1.32E-06 | 1.13E-05  | 4.622 | Transforming growth factor beta-3                                | P10600  | 7043   | TGFB3    |
| PPAC                    | -1.927 | 11.414  | -4.869 | 1.38E-06 | 1.17E-05  | 4.579 | Low molecular weight phosphotyrosine protein phosphatase         | P24666  | 52     | ACP1     |
| NDP kinase B            | -1.554 | 12.722  | -4.846 | 1.55E-06 | 1.31E-05  | 4.469 | Nucleoside diphosphate kinase B                                  | P22392  | 4831   | NME2     |
| SE6L2                   | -0.921 | 10.163  | -4.824 | 1.73E-06 | 1.44E-05  | 4.368 | Seizure 6-like protein 2                                         | Q6UXD5  | 26470  | SEZ6L2   |
| Tropomyosin 4           | -2.051 | 12.784  | -4.801 | 1.93E-06 | 1.6E-05   | 4.262 | Tropomyosin alpha-4 chain                                        | P67936  | 7171   | TPM4     |
| CAMK2B                  | -0.779 | 10.161  | -4.750 | 2.47E-06 | 2.03E-05  | 4.026 | Calcium/calmodulin-dependent protein kinase type II subunit beta | Q13554  | 816    | CAMK2B   |
| DUS3                    | -1.401 | 11.018  | -4.749 | 2.48E-06 | 2.03E-05  | 4.023 | Dual specificity protein phosphatase 3                           | P51452  | 1845   | DUSP3    |
| Coagulation Factor IXab | 0.692  | 12.855  | 4.745  | 2.53E-06 | 2.06E-05  | 4.004 | Coagulation factor IXab                                          | P00740  | 2158   | F9       |

Table S16

| vars                                | logFC  | AveExpr | t      | P.Value  | adj.P.Val | B     | TargetFullName                                                         | UniProt                    | GeneID    | Symbol                     |
|-------------------------------------|--------|---------|--------|----------|-----------|-------|------------------------------------------------------------------------|----------------------------|-----------|----------------------------|
| Stress-induced-phosphoprotein 1     | -1.227 | 11.561  | -4.734 | 2.66E-06 | 2.16E-05  | 3.954 | Stress-induced-phosphoprotein 1                                        | P31948                     | 10963     | STIP1                      |
| SGTA                                | -1.348 | 10.422  | -4.730 | 2.72E-06 | 2.19E-05  | 3.935 | Small glutamine-rich tetratricopeptide repeat-containing protein alpha | O43765                     | 6449      | SGTA                       |
| Semaphorin 3A                       | -0.597 | 11.164  | -4.722 | 2.83E-06 | 2.26E-05  | 3.898 | Semaphorin-3A                                                          | Q14563                     | 10371     | SEMA3A                     |
| CATE                                | -1.201 | 9.905   | -4.716 | 2.9E-06  | 2.31E-05  | 3.872 | Cathepsin E                                                            | P14091                     | 1510      | CTSE                       |
| 14-3-3 protein zeta/delta           | -1.133 | 15.152  | -4.707 | 3.03E-06 | 2.4E-05   | 3.832 | 14-3-3 protein zeta/delta                                              | P63104                     | 7534      | YWHAZ                      |
| PDE7A                               | -0.426 | 9.705   | -4.697 | 3.18E-06 | 2.5E-05   | 3.785 | High affinity cAMP-specific 3',5'-cyclic phosphodiesterase 7A          | Q13946                     | 5150      | PDE7A                      |
| FER                                 | -1.682 | 8.744   | -4.680 | 3.44E-06 | 2.69E-05  | 3.711 | Tyrosine-protein kinase Fer                                            | P16591                     | 2241      | FER                        |
| NID2                                | 0.617  | 12.169  | 4.647  | 4.02E-06 | 3.12E-05  | 3.562 | Nidogen-2                                                              | Q14112                     | 22795     | NID2                       |
| TACI                                | -0.413 | 11.183  | -4.639 | 4.19E-06 | 3.23E-05  | 3.523 | Tumor necrosis factor receptor superfamily member 13B                  | O14836                     | 23495     | TNFRSF13B                  |
| AMPK a2b2g1                         | -0.862 | 11.947  | -4.629 | 4.37E-06 | 3.35E-05  | 3.482 | AMP Kinase (alpha2beta2gamma1)                                         | P54646<br>O43741<br>P54619 | 5563 5565 | PRKAA2<br>PRKAB2<br>PRKAG1 |
| TSP4                                | 0.775  | 15.440  | 4.628  | 4.39E-06 | 3.35E-05  | 3.478 | Thrombospondin-4                                                       | P35443                     | 7060      | THBS4                      |
| HSP 90a/b                           | -0.738 | 11.770  | -4.627 | 4.43E-06 | 3.35E-05  | 3.470 | Heat shock protein HSP 90-alpha/beta                                   | P07900<br>P08238           |           | HSP90AA1<br>HSP90AB1       |
| Rab GDP dissociation inhibitor beta | -1.129 | 13.283  | -4.626 | 4.45E-06 | 3.35E-05  | 3.466 | Rab GDP dissociation inhibitor beta                                    | P50395                     | 2665      | GDI2                       |
| HSP 90b                             | -0.740 | 14.297  | -4.614 | 4.69E-06 | 3.51E-05  | 3.416 | Heat shock protein HSP 90-beta                                         | P08238                     | 3326      | HSP90AB1                   |
| BTK                                 | -1.491 | 11.151  | -4.608 | 4.84E-06 | 3.6E-05   | 3.386 | Tyrosine-protein kinase BTK                                            | Q06187                     | 695       | BTK                        |

Table S16

| vars       | logFC  | AveExpr | t      | P.Value  | adj.P.Val | B     | TargetFullName                                             | UniProt | GeneID | Symbol  |
|------------|--------|---------|--------|----------|-----------|-------|------------------------------------------------------------|---------|--------|---------|
| MBD4       | -0.552 | 10.124  | -4.589 | 5.27E-06 | 3.9E-05   | 3.305 | Methyl-CpG-binding domain protein 4                        | O95243  | 8930   | MBD4    |
| IGFBP-7    | 0.551  | 13.423  | 4.586  | 5.34E-06 | 3.94E-05  | 3.292 | Insulin-like growth factor-binding protein 7               | Q16270  | 3490   | IGFBP7  |
| EFNB1      | -0.474 | 12.033  | -4.577 | 5.57E-06 | 4.08E-05  | 3.252 | Ephrin-B1                                                  | P98172  | 1947   | EFNB1   |
| NKp30      | -0.585 | 9.294   | -4.570 | 5.75E-06 | 4.19E-05  | 3.221 | Natural cytotoxicity triggering receptor 3                 | O14931  | 259197 | NCR3    |
| BID        | -0.714 | 10.607  | -4.564 | 5.93E-06 | 4.29E-05  | 3.193 | BH3-interacting domain death agonist                       | P55957  | 637    | BID     |
| MIP-5      | -0.948 | 12.433  | -4.548 | 6.37E-06 | 4.58E-05  | 3.124 | C-C motif chemokine 15                                     | Q16663  | 6359   | CCL15   |
| VAV        | -1.749 | 12.151  | -4.548 | 6.38E-06 | 4.58E-05  | 3.122 | Proto-oncogene vav                                         | P15498  | 7409   | VAV1    |
| Clusterin  | -0.509 | 10.555  | -4.533 | 6.85E-06 | 4.88E-05  | 3.055 | Clusterin                                                  | P10909  | 1191   | CLU     |
| MIP-3a     | -0.813 | 8.789   | -4.531 | 6.91E-06 | 4.9E-05   | 3.047 | C-C motif chemokine 20                                     | P78556  | 6364   | CCL20   |
| BMP-7      | -0.702 | 10.521  | -4.516 | 7.38E-06 | 5.18E-05  | 2.984 | Bone morphogenetic protein 7                               | P18075  | 655    | BMP7    |
| GPVI       | -1.261 | 13.814  | -4.515 | 7.43E-06 | 5.18E-05  | 2.978 | Platelet glycoprotein VI                                   | Q9HCN6  | 51206  | GP6     |
| FGF-10     | -0.668 | 8.881   | -4.515 | 7.43E-06 | 5.18E-05  | 2.977 | Fibroblast growth factor 10                                | O15520  | 2255   | FGF10   |
| TNFSF18    | -0.278 | 10.337  | -4.513 | 7.5E-06  | 5.2E-05   | 2.969 | Tumor necrosis factor ligand superfamily member 18         | Q9UNG2  | 8995   | TNFSF18 |
| IL-15 Ra   | -0.442 | 11.056  | -4.496 | 8.09E-06 | 5.56E-05  | 2.897 | Interleukin-15 receptor subunit alpha                      | Q13261  | 3601   | IL15RA  |
| MP2K3      | -0.488 | 10.397  | -4.496 | 8.1E-06  | 5.56E-05  | 2.896 | Dual specificity mitogen-activated protein kinase kinase 3 | P46734  | 5606   | MAP2K3  |
| Esterase D | -0.707 | 10.645  | -4.473 | 8.99E-06 | 6.13E-05  | 2.797 | S-formylglutathione hydrolase                              | P10768  | 2098   | ESD     |

Table S16

| vars                | logFC  | AveExpr | t      | P.Value  | adj.P.Val | B     | TargetFullName                                                    | UniProt | GeneID | Symbol  |
|---------------------|--------|---------|--------|----------|-----------|-------|-------------------------------------------------------------------|---------|--------|---------|
| Dtk                 | -0.355 | 10.553  | -4.472 | 9.02E-06 | 6.13E-05  | 2.793 | Tyrosine-protein kinase receptor TYRO3                            | Q06418  | 7301   | TYRO3   |
| LCMT1               | -0.312 | 11.343  | -4.465 | 9.31E-06 | 6.29E-05  | 2.763 | Leucine carboxyl methyltransferase 1                              | Q9UIC8  | 51451  | LCMT1   |
| GP1BA               | -0.463 | 10.992  | -4.453 | 9.85E-06 | 6.62E-05  | 2.710 | Platelet glycoprotein Ib alpha chain                              | P07359  | 2811   | GP1BA   |
| CAMK2D              | -0.808 | 11.615  | -4.439 | 1.05E-05 | 7.01E-05  | 2.651 | Calcium/calmodulin-dependent protein kinase type II subunit delta | Q13557  | 817    | CAMK2D  |
| BCL2-like 1 protein | -0.361 | 10.386  | -4.438 | 1.05E-05 | 7.02E-05  | 2.645 | Bcl-2-like protein 1                                              | Q07817  | 598    | BCL2L1  |
| CRIS3               | -0.614 | 8.806   | -4.413 | 1.18E-05 | 7.8E-05   | 2.539 | Cysteine-rich secretory protein 3                                 | P54108  | 10321  | CRISP3  |
| kallikrein 12       | -0.431 | 12.158  | -4.396 | 1.27E-05 | 8.38E-05  | 2.466 | Kallikrein-12                                                     | Q9UKR0  | 43849  | KLK12   |
| JAM-C               | -0.732 | 11.553  | -4.388 | 1.32E-05 | 8.65E-05  | 2.432 | Junctional adhesion molecule C                                    | Q9BX67  | 83700  | JAM3    |
| ADAMTS-5            | -0.346 | 8.588   | -4.382 | 1.36E-05 | 8.83E-05  | 2.407 | A disintegrin and metalloproteinase with thrombospondin motifs 5  | Q9UNA0  | 11096  | ADAMTS5 |
| PCNA                | -0.505 | 8.799   | -4.373 | 1.41E-05 | 9.17E-05  | 2.367 | Proliferating cell nuclear antigen                                | P12004  | 5111   | PCNA    |
| Arylsulfatase A     | -0.444 | 10.399  | -4.371 | 1.42E-05 | 9.18E-05  | 2.361 | Arylsulfatase A                                                   | P15289  | 410    | ARSA    |
| MK08                | -1.114 | 9.460   | -4.370 | 1.43E-05 | 9.18E-05  | 2.357 | Mitogen-activated protein kinase 8                                | P45983  | 5599   | MAPK8   |
| SEPR                | 0.432  | 10.040  | 4.364  | 1.47E-05 | 9.4E-05   | 2.330 | Prolyl endopeptidase FAP                                          | Q12884  | 2191   | FAP     |
| RNase H1            | -0.941 | 8.282   | -4.348 | 1.58E-05 | 0.0001    | 2.264 | Ribonuclease H1                                                   | O60930  | 246243 | RNASEH1 |
| Cofilin-1           | -0.450 | 11.399  | -4.344 | 1.6E-05  | 0.000101  | 2.248 | Cofilin-1                                                         | P23528  | 1072   | CFL1    |
| AK1A1               | -0.867 | 11.280  | -4.320 | 1.79E-05 | 0.000113  | 2.144 | Alcohol dehydrogenase [NADP(+)]                                   | P14550  | 10327  | AKR1A1  |
| Contactin-5         | -0.440 | 9.748   | -4.319 | 1.8E-05  | 0.000113  | 2.140 | Contactin-5                                                       | O94779  | 53942  | CNTN5   |

Table S16

| vars                          | logFC  | AveExpr | t      | P.Value  | adj.P.Val | B     | TargetFullName                                         | UniProt          | GeneID    | Symbol           |
|-------------------------------|--------|---------|--------|----------|-----------|-------|--------------------------------------------------------|------------------|-----------|------------------|
| CSRP3                         | -0.628 | 11.210  | -4.301 | 1.94E-05 | 0.000121  | 2.065 | Cysteine and glycine-rich protein 3                    | P50461           | 8048      | CSRP3            |
| Myokinase, human              | -1.860 | 13.445  | -4.295 | 1.99E-05 | 0.000124  | 2.042 | Adenylate kinase isoenzyme 1                           | P00568           | 203       | AK1              |
| B7                            | -0.339 | 10.274  | -4.283 | 2.1E-05  | 0.00013   | 1.994 | T-lymphocyte activation antigen CD80                   | P33681           | 941       | CD80             |
| PSD7                          | -0.456 | 9.004   | -4.281 | 2.12E-05 | 0.00013   | 1.985 | 26S proteasome non-ATPase regulatory subunit 7         | P51665           | 5713      | PSMD7            |
| SARP-2                        | 0.699  | 12.811  | 4.280  | 2.13E-05 | 0.00013   | 1.980 | Secreted frizzled-related protein 1                    | Q8N474           | 6422      | SFRP1            |
| EDAR                          | -1.259 | 11.071  | -4.279 | 2.14E-05 | 0.00013   | 1.977 | Tumor necrosis factor receptor superfamily member EDAR | Q9UNE0           | 10913     | EDAR             |
| Antithrombin III              | 0.626  | 16.175  | 4.275  | 2.17E-05 | 0.000132  | 1.960 | Antithrombin-III                                       | P01008           | 462       | SERPINC1         |
| Vasoactive Intestinal Peptide | -0.548 | 8.531   | -4.261 | 2.31E-05 | 0.000139  | 1.903 | Vasoactive Intestinal Peptide                          | P01282           | 7432      | VIP              |
| Chymase                       | -0.462 | 10.231  | -4.253 | 2.4E-05  | 0.000144  | 1.867 | Chymase                                                | P23946           | 1215      | CMA1             |
| MK13                          | -0.642 | 9.927   | -4.248 | 2.45E-05 | 0.000146  | 1.847 | Mitogen-activated protein kinase 13                    | O15264           | 5603      | MAPK13           |
| PIK3CA/PIK3R1                 | -0.484 | 9.742   | -4.235 | 2.59E-05 | 0.000154  | 1.795 | PIK3CA/PIK3R1                                          | P42336<br>P27986 | 5290 5295 | PIK3CA<br>PIK3R1 |
| NKp44                         | -0.364 | 9.074   | -4.229 | 2.66E-05 | 0.000157  | 1.769 | Natural cytotoxicity triggering receptor 2             | O95944           | 9436      | NCR2             |
| CREL1                         | 0.772  | 11.570  | 4.224  | 2.71E-05 | 0.00016   | 1.751 | Cysteine-rich with EGF-like domain protein 1           | Q96HD1           | 78987     | CRELD1           |
| PKC-A                         | -0.891 | 11.798  | -4.219 | 2.77E-05 | 0.000163  | 1.730 | Protein kinase C alpha type                            | P17252           | 5578      | PRKCA            |
| PLPP                          | -1.033 | 10.916  | -4.214 | 2.84E-05 | 0.000166  | 1.707 | Pyridoxal phosphate phosphatase                        | Q96GD0           | 57026     | PDXP             |
| EPHAA                         | -0.475 | 9.176   | -4.212 | 2.87E-05 | 0.000167  | 1.699 | Ephrin type-A receptor 10                              | Q5JZY3           | 284656    | EPHA10           |

Table S16

| vars           | logFC  | AveExpr | t      | P.Value  | adj.P.Val | B     | TargetFullName                                       | UniProt | GeneID | Symbol     |
|----------------|--------|---------|--------|----------|-----------|-------|------------------------------------------------------|---------|--------|------------|
| BMP-1          | 0.741  | 11.304  | 4.207  | 2.92E-05 | 0.000169  | 1.681 | Bone morphogenetic protein 1                         | P13497  | 649    | BMP1       |
| FGF-8A         | -0.799 | 8.554   | -4.182 | 3.26E-05 | 0.000188  | 1.576 | Fibroblast growth factor 8 isoform A                 | P55075  | 2253   | FGF8       |
| IMDH2          | -0.356 | 13.152  | -4.177 | 3.32E-05 | 0.000191  | 1.559 | Inosine-5'-monophosphate dehydrogenase 2             | P12268  | 3615   | IMPDH2     |
| Thyroglobulin  | -0.433 | 8.777   | -4.144 | 3.82E-05 | 0.000218  | 1.427 | Thyroglobulin                                        | P01266  | 7038   | TG         |
| Lamin-B1       | -0.362 | 9.867   | -4.142 | 3.86E-05 | 0.00022   | 1.417 | Lamin-B1                                             | P20700  | 4001   | LMNB1      |
| AMNLS          | -0.604 | 8.019   | -4.131 | 4.04E-05 | 0.000229  | 1.375 | Protein amnionless                                   | Q9BXJ7  | 81693  | AMN        |
| EF-1-beta      | -0.625 | 9.714   | -4.129 | 4.08E-05 | 0.00023   | 1.364 | Elongation factor 1-beta                             | P24534  | 1933   | EEF1B2     |
| EP15R          | -0.845 | 10.149  | -4.124 | 4.17E-05 | 0.000234  | 1.345 | Epidermal growth factor receptor substrate 15-like 1 | Q9UBC2  | 58513  | EPS15L1    |
| CLC4K          | -0.418 | 8.351   | -4.122 | 4.2E-05  | 0.000235  | 1.337 | C-type lectin domain family 4 member K               | Q9UJ71  | 50489  | CD207      |
| AURKB          | -0.397 | 10.246  | -4.115 | 4.33E-05 | 0.000241  | 1.309 | Aurora kinase B                                      | Q96GD4  | 9212   | AURKB      |
| PSA1           | -0.455 | 10.100  | -4.114 | 4.35E-05 | 0.000241  | 1.305 | Proteasome subunit alpha type-1                      | P25786  | 5682   | PSMA1      |
| DPP2           | -0.506 | 12.367  | -4.098 | 4.65E-05 | 0.000257  | 1.242 | Dipeptidyl peptidase 2                               | Q9UHL4  | 29952  | DPP7       |
| Sonic Hedgehog | -0.520 | 9.790   | -4.087 | 4.87E-05 | 0.000267  | 1.199 | Sonic hedgehog protein                               | Q15465  | 6469   | SHH        |
| RGM-C          | 0.499  | 10.654  | 4.082  | 4.99E-05 | 0.000273  | 1.176 | Hemojuvelin                                          | Q6ZVN8  | 148738 | HFE2       |
| HNRPQ          | -0.416 | 11.269  | -4.065 | 5.34E-05 | 0.000291  | 1.111 | Heterogeneous nuclear ribonucleoprotein Q            | O60506  | 10492  | SYNCRIP    |
| CLC1B          | -0.770 | 10.318  | -4.057 | 5.53E-05 | 0.0003    | 1.079 | C-type lectin domain family 1 member B               | Q9P126  | 51266  | CLEC1B     |
| UB2L3          | -0.684 | 10.400  | -4.044 | 5.84E-05 | 0.000316  | 1.027 | Ubiquitin-conjugating enzyme E2 L3                   | P68036  | 7332   | UBE2L3     |
| H2B2E          | -1.190 | 16.219  | -4.040 | 5.93E-05 | 0.000319  | 1.012 | Histone H2B type 2-E                                 | Q16778  | 8349   | HIST2H2B E |



Table S16

| vars            | logFC  | AveExpr | t      | P.Value  | adj.P.Val | B     | TargetFullName                             | UniProt | GeneID | Symbol  |
|-----------------|--------|---------|--------|----------|-----------|-------|--------------------------------------------|---------|--------|---------|
| MAPK14          | -0.438 | 9.914   | -4.029 | 6.21E-05 | 0.000333  | 0.970 | Mitogen-activated protein kinase 14        | Q16539  | 1432   | MAPK14  |
| Moesin          | -0.685 | 10.683  | -4.021 | 6.42E-05 | 0.000342  | 0.939 | Moesin                                     | P26038  | 4478   | MSN     |
| CPNE1           | -0.836 | 9.871   | -4.019 | 6.47E-05 | 0.000344  | 0.931 | Copine-1                                   | Q99829  | 8904   | CPNE1   |
| NCC27           | -0.545 | 11.549  | -4.017 | 6.54E-05 | 0.000346  | 0.921 | Chloride intracellular channel protein 1   | O00299  | 1192   | CLIC1   |
| GAPDH, liver    | -1.190 | 14.550  | -4.010 | 6.71E-05 | 0.000354  | 0.897 | Glyceraldehyde-3-phosphate dehydrogenase   | P04406  | 2597   | GAPDH   |
| ACE2            | -0.456 | 9.623   | -3.998 | 7.06E-05 | 0.000371  | 0.849 | Angiotensin-converting enzyme 2            | Q9BYF1  | 59272  | ACE2    |
| b-Endorphin     | -0.469 | 10.096  | -3.994 | 7.17E-05 | 0.000375  | 0.834 | Beta-endorphin                             | P01189  | 5443   | POMC    |
| S100A6          | -0.962 | 11.119  | -3.977 | 7.71E-05 | 0.000402  | 0.766 | Protein S100-A6                            | P06703  | 6277   | S100A6  |
| XPNPEP1         | -0.768 | 12.221  | -3.971 | 7.89E-05 | 0.000409  | 0.744 | Xaa-Pro aminopeptidase 1                   | Q9NQW7  | 7511   | XPNPEP1 |
| IL-17B          | -0.514 | 8.075   | -3.964 | 8.12E-05 | 0.00042   | 0.717 | Interleukin-17B                            | Q9UHF5  | 27190  | IL17B   |
| UCRP            | -0.989 | 11.379  | -3.963 | 8.16E-05 | 0.00042   | 0.713 | Ubiquitin-like protein ISG15               | P05161  | 9636   | ISG15   |
| K-ras           | -0.472 | 10.049  | -3.941 | 8.93E-05 | 0.000458  | 0.628 | GTPase KRas                                | P01116  | 3845   | KRAS    |
| DLRB1           | -0.798 | 10.659  | -3.923 | 9.62E-05 | 0.000491  | 0.558 | Dynein light chain roadblock-type 1        | Q9NP97  | 83658  | DYNLRB1 |
| Peroxiredoxin-5 | -0.335 | 9.988   | -3.908 | 0.000102 | 0.000519  | 0.503 | Peroxiredoxin-5, mitochondrial             | P30044  | 25824  | PRDX5   |
| TIMP-3          | 1.326  | 12.396  | 3.906  | 0.000103 | 0.000522  | 0.493 | Metalloproteinase inhibitor 3              | P35625  | 7078   | TIMP3   |
| C2              | 0.407  | 11.470  | 3.902  | 0.000105 | 0.000526  | 0.480 | Complement C2                              | P06681  | 717    | C2      |
| WISP-1          | -0.510 | 15.167  | -3.902 | 0.000105 | 0.000526  | 0.480 | WNT1-inducible-signaling pathway protein 1 | O95388  | 8840   | WISP1   |
| IL-7 Ra         | -0.743 | 9.417   | -3.900 | 0.000106 | 0.000529  | 0.471 | Interleukin-7 receptor subunit alpha       | P16871  | 3575   | IL7R    |
| TFPI            | 0.558  | 15.653  | 3.889  | 0.00011  | 0.00055   | 0.431 | Tissue factor pathway inhibitor            | P10646  | 7035   | TFPI    |

Table S16

| vars                 | logFC  | AveExpr | t      | P.Value  | adj.P.Val | B      | TargetFullName                                     | UniProt | GeneID | Symbol |
|----------------------|--------|---------|--------|----------|-----------|--------|----------------------------------------------------|---------|--------|--------|
| Coagulation Factor X | 0.428  | 12.705  | 3.849  | 0.000129 | 0.000642  | 0.282  | Coagulation Factor X                               | P00742  | 2159   | F10    |
| dopa decarboxylase   | -0.366 | 8.461   | -3.840 | 0.000134 | 0.000665  | 0.245  | Aromatic-L-amino-acid decarboxylase                | P20711  | 1644   | DDC    |
| Protein S            | 0.443  | 12.271  | 3.836  | 0.000136 | 0.000673  | 0.230  | Vitamin K-dependent protein S                      | P07225  | 5627   | PROS1  |
| SMAD2                | -1.051 | 12.119  | -3.833 | 0.000138 | 0.000677  | 0.221  | Mothers against decapentaplegic homolog 2          | Q15796  | 4087   | SMAD2  |
| LYN                  | -1.104 | 11.893  | -3.832 | 0.000138 | 0.000677  | 0.218  | Tyrosine-protein kinase Lyn                        | P07948  | 4067   | LYN    |
| BCL6                 | -0.333 | 11.148  | -3.828 | 0.000141 | 0.000683  | 0.203  | B-cell lymphoma 6 protein                          | P41182  | 604    | BCL6   |
| MMP-9                | -0.820 | 9.286   | -3.828 | 0.000141 | 0.000683  | 0.202  | Matrix metalloproteinase-9                         | P14780  | 4318   | MMP9   |
| bFGF                 | -1.511 | 11.608  | -3.827 | 0.000141 | 0.000683  | 0.199  | Fibroblast growth factor 2                         | P09038  | 2247   | FGF2   |
| PECAM-1              | -0.282 | 11.025  | -3.823 | 0.000144 | 0.000693  | 0.182  | Platelet endothelial cell adhesion molecule        | P16284  | 5175   | PECAM1 |
| AREG                 | -1.013 | 10.467  | -3.813 | 0.000149 | 0.000717  | 0.147  | Amphiregulin                                       | P15514  | 374    | AREG   |
| AIP                  | -0.387 | 11.458  | -3.801 | 0.000156 | 0.000748  | 0.102  | AH receptor-interacting protein                    | O00170  | 9049   | AIP    |
| HSP 70               | -0.616 | 12.592  | -3.801 | 0.000157 | 0.000748  | 0.100  | Heat shock 70 kDa protein 1A                       | P0DMV8  | 3303   | HSPA1A |
| AFP                  | -0.446 | 10.442  | -3.795 | 0.000161 | 0.000763  | 0.078  | alpha-Fetoprotein                                  | P02771  | 174    | AFP    |
| CKAP2                | -0.553 | 13.807  | -3.786 | 0.000166 | 0.000786  | 0.047  | Cytoskeleton-associated protein 2                  | Q8WWK9  | 26586  | CKAP2  |
| GPC2                 | -0.520 | 8.852   | -3.784 | 0.000168 | 0.000791  | 0.038  | Glypican-2                                         | Q8N158  | 221914 | GPC2   |
| Neurotrophin-3       | -0.546 | 8.094   | -3.773 | 0.000175 | 0.000818  | 0.000  | Neurotrophin-3                                     | P20783  | 4908   | NTF3   |
| STAT6                | -0.511 | 9.507   | -3.773 | 0.000175 | 0.000818  | -0.001 | Signal transducer and activator of transcription 6 | P42226  | 6778   | STAT6  |

Table S16

| vars        | logFC  | AveExpr | t      | P.Value  | adj.P.Val | B      | TargetFullName                                        | UniProt | GeneID | Symbol    |
|-------------|--------|---------|--------|----------|-----------|--------|-------------------------------------------------------|---------|--------|-----------|
| ghrelin     | -0.445 | 11.216  | -3.772 | 0.000176 | 0.00082   | -0.006 | Appetite-regulating hormone                           | Q9UBU3  | 51738  | GHRL      |
| eIF-5A-1    | -0.869 | 10.008  | -3.768 | 0.000179 | 0.00083   | -0.021 | Eukaryotic translation initiation factor 5A-1         | P63241  | 1984   | EIF5A     |
| TSLP        | -0.458 | 9.306   | -3.764 | 0.000181 | 0.000839  | -0.034 | Thymic stromal lymphopoietin                          | Q969D9  | 85480  | TSLP      |
| TWEAKR      | -1.012 | 9.760   | -3.763 | 0.000182 | 0.000839  | -0.037 | Tumor necrosis factor receptor superfamily member 12A | Q9NP84  | 51330  | TNFRSF12A |
| RAC1        | -1.040 | 12.343  | -3.759 | 0.000185 | 0.000849  | -0.052 | Ras-related C3 botulinum toxin substrate 1            | P63000  | 5879   | RAC1      |
| ASM3A       | -0.443 | 15.116  | -3.758 | 0.000186 | 0.000851  | -0.058 | Acid sphingomyelinase-like phosphodiesterase 3a       | Q92484  | 10924  | SMPDL3A   |
| p53         | -0.447 | 12.394  | -3.755 | 0.000187 | 0.000856  | -0.066 | Cellular tumor antigen p53                            | P04637  | 7157   | TP53      |
| KI2L4       | -0.689 | 10.384  | -3.748 | 0.000193 | 0.000878  | -0.093 | Killer cell immunoglobulin-like receptor 2DL4         | Q99706  | 3805   | KIR2DL4   |
| MDM2        | -0.404 | 8.481   | -3.745 | 0.000195 | 0.000885  | -0.104 | E3 ubiquitin-protein ligase Mdm2                      | Q00987  | 4193   | MDM2      |
| PAK6        | -0.474 | 9.411   | -3.734 | 0.000204 | 0.000921  | -0.144 | Serine/threonine-protein kinase PAK 6                 | Q9NQU5  | 56924  | PAK6      |
| Prothrombin | 0.665  | 16.642  | 3.720  | 0.000215 | 0.00097   | -0.196 | Prothrombin                                           | P00734  | 2147   | F2        |
| IL-2 sRg    | -0.704 | 10.902  | -3.718 | 0.000217 | 0.000974  | -0.203 | Cytokine receptor common subunit gamma                | P31785  | 3561   | IL2RG     |
| ALK-1       | -0.376 | 11.236  | -3.706 | 0.000227 | 0.001017  | -0.247 | Serine/threonine-protein kinase receptor R3           | P37023  | 94     | ACVRL1    |
| DC-SIGNR    | -0.343 | 13.240  | -3.698 | 0.000234 | 0.001043  | -0.273 | C-type lectin domain family 4 member M                | Q9H2X3  | 10332  | CLEC4M    |

Table S16

| vars          | logFC  | AveExpr | t      | P.Value  | adj.P.Val | B      | TargetFullName                                                       | UniProt | GeneID | Symbol |
|---------------|--------|---------|--------|----------|-----------|--------|----------------------------------------------------------------------|---------|--------|--------|
| C1QBP         | -0.254 | 13.459  | -3.689 | 0.000242 | 0.001076  | -0.306 | Complement component 1 Q subcomponent-binding protein, mitochondrial | Q07021  | 708    | C1QBP  |
| Layilin       | -0.281 | 11.139  | -3.686 | 0.000246 | 0.001087  | -0.319 | Layilin                                                              | Q6UX15  | 143903 | LAYN   |
| Kallikrein 11 | -0.495 | 11.305  | -3.642 | 0.00029  | 0.001281  | -0.475 | Kallikrein-11                                                        | Q9UBX7  | 11012  | KLK11  |
| PGP9.5        | -0.492 | 10.872  | -3.630 | 0.000304 | 0.001335  | -0.516 | Ubiquitin carboxyl-terminal hydrolase isozyme L1                     | P09936  | 7345   | UCHL1  |
| IF4A3         | -0.534 | 9.586   | -3.617 | 0.000319 | 0.001398  | -0.562 | Eukaryotic initiation factor 4A-III                                  | P38919  | 9775   | EIF4A3 |
| GV            | -0.344 | 9.067   | -3.607 | 0.000332 | 0.001451  | -0.600 | Calcium-dependent phospholipase A2                                   | P39877  | 5322   | PLA2G5 |
| PLCG1         | -0.645 | 9.529   | -3.603 | 0.000337 | 0.001469  | -0.614 | 1-phosphatidylinositol 4,5-bisphosphate phosphodiesterase gamma-1    | P19174  | 5335   | PLCG1  |
| ULBP-2        | -0.730 | 9.229   | -3.600 | 0.00034  | 0.001475  | -0.621 | NKG2D ligand 2                                                       | Q9BZM5  | 80328  | ULBP2  |
| CD30 Ligand   | -0.361 | 11.577  | -3.592 | 0.000351 | 0.001514  | -0.651 | Tumor necrosis factor ligand superfamily member 8                    | P32971  | 944    | TNFSF8 |
| b-ECGF        | -0.316 | 7.958   | -3.592 | 0.000351 | 0.001514  | -0.652 | Fibroblast growth factor 1                                           | P05230  | 2246   | FGF1   |
| BMX           | -0.314 | 9.091   | -3.589 | 0.000355 | 0.001526  | -0.662 | Cytoplasmic tyrosine-protein kinase BMX                              | P51813  | 660    | BMX    |
| PFD5          | -0.481 | 9.347   | -3.579 | 0.000369 | 0.001578  | -0.697 | Prefoldin subunit 5                                                  | Q99471  | 5204   | PFDN5  |
| NKG2D         | -0.454 | 10.832  | -3.578 | 0.00037  | 0.001581  | -0.701 | NKG2-D type II integral membrane protein                             | P26718  | 22914  | KLRK1  |
| FGF-5         | -0.591 | 10.446  | -3.574 | 0.000375 | 0.001596  | -0.713 | Fibroblast growth factor 5                                           | P12034  | 2250   | FGF5   |

Table S16

| vars            | logFC  | AveExpr | t      | P.Value  | adj.P.Val | B      | TargetFullName                                     | UniProt | GeneID | Symbol  |
|-----------------|--------|---------|--------|----------|-----------|--------|----------------------------------------------------|---------|--------|---------|
| TYK2            | 0.642  | 12.372  | 3.568  | 0.000384 | 0.001628  | -0.735 | Non-receptor tyrosine-protein kinase TYK2          | P29597  | 7297   | TYK2    |
| IL-1Rrp2        | -0.375 | 10.235  | -3.564 | 0.00039  | 0.001648  | -0.749 | Interleukin-1 receptor-like 2                      | Q9HB29  | 8808   | IL1RL2  |
| Chk2            | -1.398 | 9.112   | -3.562 | 0.000393 | 0.001655  | -0.756 | Serine/threonine-protein kinase Chk2               | O96017  | 11200  | CHEK2   |
| Somatostatin-28 | -0.320 | 10.372  | -3.560 | 0.000396 | 0.001664  | -0.764 | Somatostatin-28                                    | P61278  | 6750   | SST     |
| WNK3            | -0.859 | 9.330   | -3.544 | 0.000421 | 0.001759  | -0.819 | Serine/threonine-protein kinase WNK3               | Q9BYP7  | 65267  | WNK3    |
| HMG-1           | -0.346 | 11.660  | -3.540 | 0.000426 | 0.001771  | -0.831 | High mobility group protein B1                     | P09429  | 3146   | HMGB1   |
| CD22            | -0.255 | 10.583  | -3.540 | 0.000426 | 0.001771  | -0.831 | B-cell receptor CD22                               | P20273  | 933    | CD22    |
| CSK21           | -0.463 | 9.234   | -3.531 | 0.000441 | 0.001826  | -0.862 | Casein kinase II subunit alpha                     | P68400  | 1457   | CSNK2A1 |
| AMPM2           | -0.810 | 13.322  | -3.530 | 0.000442 | 0.001826  | -0.865 | Methionine aminopeptidase 2                        | P50579  | 10988  | METAP2  |
| IFNA7           | -0.610 | 9.321   | -3.529 | 0.000444 | 0.001826  | -0.868 | Interferon alpha-7                                 | P01567  |        | IFNA7   |
| IL-4            | -0.456 | 9.735   | -3.526 | 0.00045  | 0.001846  | -0.881 | Interleukin-4                                      | P05112  | 3565   | IL4     |
| SPHK2           | -0.317 | 10.126  | -3.519 | 0.000462 | 0.001889  | -0.906 | Sphingosine kinase 2                               | Q9NRA0  | 56848  | SPHK2   |
| Survivin        | -0.250 | 10.308  | -3.499 | 0.000496 | 0.002023  | -0.972 | Baculoviral IAP repeat-containing protein 5        | O15392  | 332    | BIRC5   |
| Granzyme B      | -0.627 | 8.496   | -3.492 | 0.00051  | 0.002069  | -0.998 | Granzyme B                                         | P10144  | 3002   | GZMB    |
| HB-EGF          | -0.527 | 8.390   | -3.491 | 0.00051  | 0.002069  | -0.998 | Heparin-binding EGF-like growth factor             | Q99075  | 1839   | HBEGF   |
| kallikrein 13   | -0.277 | 10.509  | -3.487 | 0.000519 | 0.002098  | -1.014 | Kallikrein-13                                      | Q9UKR3  | 26085  | KLK13   |
| C3d             | 0.526  | 13.948  | 3.481  | 0.00053  | 0.002133  | -1.033 | Complement C3d fragment                            | P01024  | 718    | C3      |
| LRP8            | -0.378 | 11.749  | -3.480 | 0.000532 | 0.002137  | -1.037 | Low-density lipoprotein receptor-related protein 8 | Q14114  | 7804   | LRP8    |
| Activin RIB     | -0.402 | 9.077   | -3.478 | 0.000537 | 0.00215   | -1.046 | Activin receptor type-1B                           | P36896  | 91     | ACVR1B  |
| Cystatin-S      | -0.542 | 8.532   | -3.452 | 0.000589 | 0.00235   | -1.132 | Cystatin-S                                         | P01036  | 1472   | CST4    |

Table S16

| vars                 | logFC  | AveExpr | t      | P.Value  | adj.P.Val | B      | TargetFullName                                            | UniProt           | GeneID    | Symbol  |
|----------------------|--------|---------|--------|----------|-----------|--------|-----------------------------------------------------------|-------------------|-----------|---------|
| PGCB                 | -0.460 | 10.512  | -3.451 | 0.000591 | 0.00235   | -1.134 | Brevican core protein                                     | Q96GW7            | 63827     | BCAN    |
| NovH                 | -0.326 | 10.696  | -3.451 | 0.000592 | 0.00235   | -1.136 | Protein NOV homolog                                       | P48745            | 4856      | NOV     |
| Factor H             | 0.315  | 16.093  | 3.441  | 0.000615 | 0.002432  | -1.171 | Complement factor H                                       | P08603            | 3075      | CFH     |
| ITI heavy chain H4   | 0.948  | 14.807  | 3.437  | 0.000623 | 0.002456  | -1.183 | Inter-alpha-trypsin inhibitor heavy chain H4              | Q14624            | 3700      | ITIH4   |
| CK-MB                | 1.252  | 9.310   | 3.423  | 0.000655 | 0.002575  | -1.230 | Creatine kinase M-type:Creatine kinase B-type heterodimer | P12277<br>P06732  | 1152 1158 | CKB CKM |
| CD40 ligand, soluble | -0.615 | 9.319   | -3.420 | 0.000661 | 0.002592  | -1.238 | CD40 ligand                                               | P29965            | 959       | CD40LG  |
| RAN                  | -1.289 | 10.158  | -3.419 | 0.000666 | 0.002598  | -1.244 | GTP-binding nuclear protein Ran                           | P62826            | 5901      | RAN     |
| FLRT1                | -0.412 | 10.017  | -3.418 | 0.000667 | 0.002598  | -1.246 | Leucine-rich repeat transmembrane protein FLRT1           | Q9NZU1            | 23769     | FLRT1   |
| JAK2                 | 0.764  | 17.310  | 3.414  | 0.000678 | 0.002633  | -1.261 | Tyrosine-protein kinase JAK2                              | O60674            | 3717      | JAK2    |
| suPAR                | -0.344 | 9.756   | -3.407 | 0.000694 | 0.002687  | -1.283 | Urokinase plasminogen activator surface receptor          | Q03405            | 5329      | PLAUR   |
| MFRP                 | -0.418 | 10.059  | -3.394 | 0.000729 | 0.002808  | -1.328 | Membrane frizzled-related protein                         | Q9BY79            | 83552     | MFRP    |
| Lymphotoxin a2/b1    | -0.339 | 11.545  | -3.393 | 0.00073  | 0.002808  | -1.329 | Lymphotoxin alpha2:beta1                                  | P01374,<br>Q06643 | 4049 4050 | LTA LTB |
| GIIE                 | -0.356 | 9.273   | -3.377 | 0.000774 | 0.002972  | -1.384 | Group IIE secretory phospholipase A2                      | Q9NZK7            | 30814     | PLA2G2E |
| NXPH1                | 0.427  | 11.628  | 3.369  | 0.000795 | 0.003042  | -1.408 | Neurexophilin-1                                           | P58417            | 30010     | NXPH1   |
| IGFBP-4              | 0.456  | 11.566  | 3.367  | 0.0008   | 0.003052  | -1.414 | Insulin-like growth factor-binding protein 4              | P22692            | 3487      | IGFBP4  |
| IL-3 Ra              | -0.566 | 9.909   | -3.364 | 0.000809 | 0.003077  | -1.424 | Interleukin-3 receptor subunit alpha                      | P26951            | 3563      | IL3RA   |
| ULBP-3               | -0.444 | 9.626   | -3.358 | 0.000827 | 0.003137  | -1.445 | NKG2D ligand 3                                            | Q9BZM4            | 79465     | ULBP3   |

Table S16

| vars                    | logFC  | AveExpr | t      | P.Value  | adj.P.Val | B      | TargetFullName                                       | UniProt | GeneID | Symbol   |
|-------------------------|--------|---------|--------|----------|-----------|--------|------------------------------------------------------|---------|--------|----------|
| IL-10                   | -0.501 | 8.693   | -3.348 | 0.000858 | 0.003245  | -1.479 | Interleukin-10                                       | P22301  | 3586   | IL10     |
| RANTES                  | 0.969  | 15.561  | 3.343  | 0.000872 | 0.003287  | -1.493 | C-C motif chemokine 5                                | P13501  | 6352   | CCL5     |
| PCI                     | 2.257  | 15.112  | 3.324  | 0.000934 | 0.003512  | -1.557 | Plasma serine protease inhibitor                     | P05154  | 5104   | SERPINA5 |
| Angiopoietin-2          | 0.473  | 6.915   | 3.319  | 0.000951 | 0.003566  | -1.573 | Angiopoietin-2                                       | O15123  | 285    | ANGPT2   |
| MATK                    | -0.399 | 9.818   | -3.314 | 0.000969 | 0.003608  | -1.590 | Megakaryocyte-associated tyrosine-protein kinase     | P42679  | 4145   | MATK     |
| Galectin-4              | -0.319 | 9.853   | -3.313 | 0.000969 | 0.003608  | -1.591 | Galectin-4                                           | P56470  | 3960   | LGALS4   |
| Thrombopoietin Receptor | -0.356 | 8.634   | -3.313 | 0.000971 | 0.003608  | -1.592 | Thrombopoietin Receptor                              | P40238  | 4352   | MPL      |
| NCK1                    | -0.574 | 10.695  | -3.307 | 0.000992 | 0.00367   | -1.612 | Cytoplasmic protein NCK1                             | P16333  | 4690   | NCK1     |
| KPCT                    | -0.440 | 11.387  | -3.306 | 0.000993 | 0.00367   | -1.613 | Protein kinase C theta type                          | Q04759  | 5588   | PRKCQ    |
| TSLP R                  | -0.312 | 11.047  | -3.299 | 0.001019 | 0.003756  | -1.637 | Cytokine receptor-like factor 2                      | Q9HC73  | 64109  | CRLF2    |
| Cyclophilin F           | -1.209 | 11.766  | -3.295 | 0.001034 | 0.003798  | -1.650 | Peptidyl-prolyl cis-trans isomerase F, mitochondrial | P30405  | 10105  | PPIF     |
| GPC6                    | -0.314 | 12.806  | -3.293 | 0.001043 | 0.00382   | -1.658 | Glypican-6                                           | Q9Y625  | 10082  | GPC6     |
| EPHA3                   | -0.545 | 7.834   | -3.290 | 0.001052 | 0.003842  | -1.666 | Ephrin type-A receptor 3                             | P29320  | 2042   | EPHA3    |
| IL-18 Rb                | -0.410 | 8.898   | -3.288 | 0.001058 | 0.003854  | -1.671 | Interleukin-18 receptor accessory protein            | O95256  | 8807   | IL18RAP  |
| OX40 Ligand             | -0.469 | 9.352   | -3.281 | 0.001086 | 0.003941  | -1.695 | Tumor necrosis factor ligand superfamily member 4    | P23510  | 7292   | TNFSF4   |
| C5a                     | 0.729  | 14.239  | 3.280  | 0.001088 | 0.003941  | -1.697 | C5a anaphylatoxin                                    | P01031  | 727    | C5       |
| IL-7                    | -0.370 | 8.602   | -3.276 | 0.001105 | 0.003994  | -1.712 | Interleukin-7                                        | P13232  | 3574   | IL7      |

Table S16

| vars                 | logFC  | AveExpr | t      | P.Value  | adj.P.Val | B      | TargetFullName                                                                         | UniProt          | GeneID     | Symbol                                           |
|----------------------|--------|---------|--------|----------|-----------|--------|----------------------------------------------------------------------------------------|------------------|------------|--------------------------------------------------|
| IgG                  | 0.341  | 17.605  | 3.263  | 0.001158 | 0.004171  | -1.754 | Immunoglobulin G                                                                       | P01857           | 3500 3501  | IGHG1<br>IGHG2<br>IGHG3<br>IGHG4<br>IGK@<br>IGL@ |
| WIF-1                | -0.407 | 11.518  | -3.249 | 0.001213 | 0.004358  | -1.797 | Wnt inhibitory factor 1                                                                | Q9Y5W5           | 11197      | WIF1                                             |
| BAD                  | -0.874 | 11.790  | -3.246 | 0.001227 | 0.004395  | -1.807 | Bcl2-associated agonist<br>of cell death                                               | Q92934           | 572        | BAD                                              |
| Catalase             | -1.085 | 13.139  | -3.245 | 0.001231 | 0.004398  | -1.810 | Catalase                                                                               | P04040           | 847        | CAT                                              |
| Mesothelin           | -0.702 | 9.371   | -3.231 | 0.00129  | 0.004597  | -1.854 | Mesothelin                                                                             | Q13421           | 10232      | MSLN                                             |
| IL-9                 | -0.462 | 9.212   | -3.228 | 0.001304 | 0.004633  | -1.863 | Interleukin-9                                                                          | P15248           | 3578       | IL9                                              |
| HSP 40               | -0.612 | 8.615   | -3.217 | 0.001354 | 0.004797  | -1.897 | DnaJ homolog<br>subfamily B member 1                                                   | P25685           | 3337       | DNAJB1                                           |
| FST                  | -0.272 | 9.727   | -3.196 | 0.001457 | 0.00515   | -1.965 | Follistatin                                                                            | P19883           | 10468      | FST                                              |
| RANK                 | -0.312 | 10.565  | -3.194 | 0.001468 | 0.005172  | -1.972 | Tumor necrosis factor<br>receptor superfamily<br>member 11A                            | Q9Y6Q6           | 8792       | TNFRSF11<br>A                                    |
| DHH                  | -0.586 | 9.266   | -3.186 | 0.001505 | 0.005289  | -1.994 | Desert hedgehog<br>protein N-product                                                   | O43323           | 50846      | DHH                                              |
| CLF-1/CLC Complex    | -0.375 | 9.741   | -3.175 | 0.001562 | 0.005475  | -2.029 | Cytokine receptor-like<br>factor 1:Cardiotrophin-<br>like cytokine factor 1<br>Complex | O75462<br>Q9UBD9 | 9244 23529 | CRLF1<br>CLCF1                                   |
| Carbonic anhydrase I | -1.491 | 13.750  | -3.175 | 0.001566 | 0.005476  | -2.031 | Carbonic anhydrase 1                                                                   | P00915           | 759        | CA1                                              |
| INGR2                | -0.484 | 9.968   | -3.172 | 0.001578 | 0.005502  | -2.038 | Interferon gamma<br>receptor 2                                                         | P38484           | 3460       | IFNGR2                                           |
| ERP29                | 0.428  | 11.866  | 3.156  | 0.001668 | 0.0058    | -2.089 | Endoplasmic reticulum<br>resident protein 29                                           | P30040           | 10961      | ERP29                                            |



Table S16

| vars                            | logFC  | AveExpr | t      | P.Value  | adj.P.Val | B      | TargetFullName                             | UniProt | GeneID | Symbol   |
|---------------------------------|--------|---------|--------|----------|-----------|--------|--------------------------------------------|---------|--------|----------|
| PSA6                            | -0.417 | 9.836   | -3.147 | 0.001721 | 0.00597   | -2.118 | Proteasome subunit alpha type-6            | P60900  | 5687   | PSMA6    |
| PIM1                            | -0.365 | 10.359  | -3.141 | 0.001754 | 0.006066  | -2.135 | Serine/threonine-protein kinase pim-1      | P11309  | 5292   | PIM1     |
| Kallikrein 4                    | -0.395 | 9.299   | -3.130 | 0.001818 | 0.006272  | -2.167 | Kallikrein-4                               | Q9Y5K2  | 9622   | KLK4     |
| COMMD7                          | -0.415 | 11.703  | -3.124 | 0.001859 | 0.006395  | -2.188 | COMM domain-containing protein 7           | Q86VX2  | 149951 | COMMD7   |
| DERM                            | 0.456  | 11.908  | 3.120  | 0.001884 | 0.006465  | -2.200 | Dermatopontin                              | Q07507  | 1805   | DPT      |
| Aflatoxin B1 aldehyde reductase | -1.009 | 12.455  | -3.118 | 0.001897 | 0.006493  | -2.206 | Aflatoxin B1 aldehyde reductase member 2   | O43488  | 8574   | AKR7A2   |
| TMA                             | -0.290 | 11.537  | -3.111 | 0.001943 | 0.006631  | -2.228 | Thyroid peroxidase                         | P07202  | 7173   | TPO      |
| MMP-13                          | -0.661 | 10.185  | -3.102 | 0.002    | 0.006809  | -2.255 | Collagenase 3                              | P45452  | 4322   | MMP13    |
| RSPO3                           | -0.449 | 11.215  | -3.094 | 0.002051 | 0.006965  | -2.278 | R-spondin-3                                | Q9BXY4  | 84870  | RSPO3    |
| RAD51                           | -0.401 | 11.701  | -3.093 | 0.00206  | 0.006976  | -2.282 | DNA repair protein RAD51 homolog 1         | Q06609  | 5888   | RAD51    |
| p27Kip1                         | -0.911 | 10.518  | -3.092 | 0.002065 | 0.006976  | -2.284 | Cyclin-dependent kinase inhibitor 1B       | P46527  | 1027   | CDKN1B   |
| CD244                           | -0.494 | 8.867   | -3.090 | 0.002083 | 0.007018  | -2.292 | Natural killer cell receptor 2B4           | Q9BZW8  | 51744  | CD244    |
| Endothelin-converting enzyme 1  | 0.292  | 14.324  | 3.088  | 0.002096 | 0.007043  | -2.297 | Endothelin-converting enzyme 1             | P42892  | 1889   | ECE1     |
| MSP R                           | -0.280 | 9.806   | -3.085 | 0.002119 | 0.007101  | -2.307 | Macrophage-stimulating protein receptor    | Q04912  | 4486   | MST1R    |
| Histone H1.2                    | -1.252 | 12.776  | -3.070 | 0.002221 | 0.007426  | -2.350 | Histone H1.2                               | P16403  | 3006   | HIST1H1C |
| MO2R1                           | -0.496 | 10.518  | -3.067 | 0.002248 | 0.007496  | -2.361 | Cell surface glycoprotein CD200 receptor 1 | Q8TD46  | 131450 | CD200R1  |
| EG-VEGF                         | -0.421 | 8.577   | -3.060 | 0.002296 | 0.007636  | -2.380 | Prokineticin-1                             | P58294  | 84432  | PROK1    |
| ERBB2                           | -0.411 | 9.749   | -3.037 | 0.002482 | 0.008232  | -2.451 | Receptor tyrosine-protein kinase erbB-2    | P04626  | 2064   | ERBB2    |
| GX                              | -0.292 | 9.848   | -3.017 | 0.002641 | 0.008739  | -2.508 | Group 10 secretory phospholipase A2        | O15496  | 8399   | PLA2G10  |

Table S16

| vars            | logFC  | AveExpr | t      | P.Value  | adj.P.Val | B      | TargetFullName                                                   | UniProt | GeneID | Symbol  |
|-----------------|--------|---------|--------|----------|-----------|--------|------------------------------------------------------------------|---------|--------|---------|
| Tpo             | -0.492 | 9.130   | -3.010 | 0.002702 | 0.008919  | -2.528 | Thrombopoietin                                                   | P40225  | 7066   | THPO    |
| HO-2            | -0.437 | 9.999   | -3.008 | 0.002725 | 0.008972  | -2.536 | Heme oxygenase 2                                                 | P30519  | 3163   | HMOX2   |
| PPIE            | -0.725 | 9.378   | -3.001 | 0.002784 | 0.00914   | -2.555 | Peptidyl-prolyl cis-trans isomerase E                            | Q9UNP9  | 10450  | PPIE    |
| ATS1            | -0.363 | 9.234   | -2.992 | 0.00287  | 0.009401  | -2.583 | A disintegrin and metalloproteinase with thrombospondin motifs 1 | Q9UHI8  | 9510   | ADAMTS1 |
| MDHC            | -0.698 | 13.721  | -2.989 | 0.002897 | 0.009465  | -2.592 | Malate dehydrogenase, cytoplasmic                                | P40925  | 4190   | MDH1    |
| Sialoadhesin    | -0.411 | 7.671   | -2.986 | 0.002927 | 0.009537  | -2.601 | Sialoadhesin                                                     | Q9BZZ2  | 6614   | SIGLEC1 |
| LKHA4           | 1.287  | 11.372  | 2.978  | 0.003001 | 0.009755  | -2.624 | Leukotriene A-4 hydrolase                                        | P09960  | 4048   | LTA4H   |
| Peroxiredoxin-6 | -1.110 | 14.865  | -2.972 | 0.003058 | 0.009915  | -2.641 | Peroxiredoxin-6                                                  | P30041  | 9588   | PRDX6   |
| ABL2            | -0.288 | 11.960  | -2.971 | 0.003074 | 0.009942  | -2.645 | Abelson tyrosine-protein kinase 2                                | P42684  | 27     | ABL2    |
| Keratin 18      | -0.342 | 10.657  | -2.967 | 0.003113 | 0.010042  | -2.657 | Keratin, type I cytoskeletal 18                                  | P05783  | 3875   | KRT18   |
| BMPR1A          | -0.414 | 9.912   | -2.966 | 0.003122 | 0.010049  | -2.659 | Bone morphogenetic protein receptor type-1A                      | P36894  | 657    | BMPR1A  |
| FGF-4           | -0.351 | 8.678   | -2.960 | 0.003184 | 0.01022   | -2.677 | Fibroblast growth factor 4                                       | P08620  | 2249   | FGF4    |
| MK01            | -0.948 | 11.256  | -2.949 | 0.003293 | 0.010547  | -2.708 | Mitogen-activated protein kinase 1                               | P28482  | 5594   | MAPK1   |
| GFAP            | -0.439 | 9.886   | -2.947 | 0.003311 | 0.010578  | -2.713 | Glial fibrillary acidic protein                                  | P14136  | 2670   | GFAP    |
| DAN             | -0.460 | 11.971  | -2.935 | 0.00344  | 0.010963  | -2.747 | Neuroblastoma suppressor of tumorigenicity 1                     | P41271  | 4681   | NBL1    |
| ANGL3           | -0.283 | 9.776   | -2.930 | 0.003501 | 0.011131  | -2.763 | Angiopoietin-related protein 3                                   | Q9Y5C1  | 27329  | ANGPTL3 |

Table S16

| vars                        | logFC  | AveExpr | t      | P.Value  | adj.P.Val | B      | TargetFullName                                                    | UniProt | GeneID | Symbol   |
|-----------------------------|--------|---------|--------|----------|-----------|--------|-------------------------------------------------------------------|---------|--------|----------|
| Cytidylate kinase           | -0.328 | 13.902  | -2.925 | 0.003554 | 0.011272  | -2.777 | UMP-CMP kinase                                                    | P30085  | 51727  | CMPK1    |
| paraoxonase 1               | -0.338 | 8.368   | -2.921 | 0.003596 | 0.011374  | -2.787 | Serum paraoxonase/arylesterase 1                                  | P27169  | 5444   | PON1     |
| SET                         | 0.307  | 14.151  | 2.916  | 0.003655 | 0.011533  | -2.802 | Protein SET                                                       | Q01105  | 6418   | SET      |
| MK12                        | -0.403 | 9.545   | -2.915 | 0.003672 | 0.011559  | -2.806 | Mitogen-activated protein kinase 12                               | P53778  | 6300   | MAPK12   |
| BGH3                        | 0.423  | 14.985  | 2.913  | 0.003695 | 0.011603  | -2.812 | Transforming growth factor-beta-induced protein ig-h3             | Q15582  | 7045   | TGFB1    |
| DnaJ homolog                | -0.301 | 9.710   | -2.912 | 0.003704 | 0.011603  | -2.814 | Mitochondrial import inner membrane translocase subunit TIM14     | Q96DA6  | 131118 | DNAJC19  |
| Coagulation Factor Xa       | 0.346  | 12.345  | 2.909  | 0.003741 | 0.011692  | -2.823 | Coagulation factor Xa                                             | P00742  | 2159   | F10      |
| STX1a                       | -0.293 | 9.942   | -2.905 | 0.003783 | 0.011796  | -2.833 | Syntaxin-1A                                                       | Q16623  | 6804   | STX1A    |
| discoidin domain receptor 1 | -0.426 | 8.630   | -2.896 | 0.003901 | 0.012132  | -2.861 | Epithelial discoidin domain-containing receptor 1                 | Q08345  | 780    | DDR1     |
| DBNL                        | -0.462 | 10.887  | -2.892 | 0.00394  | 0.012226  | -2.870 | Drebrin-like protein                                              | Q9UJU6  | 28988  | DBNL     |
| EGF                         | -0.607 | 11.509  | -2.890 | 0.003967 | 0.012261  | -2.876 | Epidermal growth factor                                           | P01133  | 1950   | EGF      |
| ATS15                       | -0.253 | 9.028   | -2.890 | 0.00397  | 0.012261  | -2.877 | A disintegrin and metalloproteinase with thrombospondin motifs 15 | Q8TE58  | 170689 | ADAMTS15 |
| 14-3-3 protein theta        | -0.195 | 11.337  | -2.884 | 0.004044 | 0.012448  | -2.893 | 14-3-3 protein theta                                              | P27348  | 10971  | YWHAQ    |
| Apo E4                      | 0.493  | 17.690  | 2.884  | 0.00405  | 0.012448  | -2.895 | Apolipoprotein E (isoform E4)                                     | P02649  | 348    | APOE     |
| FYN                         | -1.040 | 12.486  | -2.864 | 0.004307 | 0.013206  | -2.950 | Tyrosine-protein kinase Fyn                                       | P06241  | 2534   | FYN      |
| IL-34                       | -0.451 | 10.066  | -2.857 | 0.004407 | 0.013482  | -2.971 | Interleukin-34                                                    | Q6ZMJ4  | 146433 | IL34     |

Table S16

| vars                      | logFC  | AveExpr | t      | P.Value  | adj.P.Val | B      | TargetFullName                                       | UniProt | GeneID | Symbol   |
|---------------------------|--------|---------|--------|----------|-----------|--------|------------------------------------------------------|---------|--------|----------|
| a1-Antichymotrypsin       | 0.217  | 17.978  | 2.849  | 0.004508 | 0.013756  | -2.991 | Alpha-1-antichymotrypsin                             | P01011  | 12     | SERPINA3 |
| Coactosin-like protein    | -0.292 | 12.199  | -2.849 | 0.004519 | 0.013758  | -2.993 | Coactosin-like protein                               | Q14019  | 23406  | COTL1    |
| IL-1F6                    | -0.949 | 12.940  | -2.838 | 0.004669 | 0.014183  | -3.023 | Interleukin-36 alpha                                 | Q9UHA7  | 27179  | IL36A    |
| SAP                       | 0.360  | 15.222  | 2.836  | 0.004706 | 0.014261  | -3.030 | Serum amyloid P-component                            | P02743  | 325    | APCS     |
| TPSG1                     | -0.528 | 8.855   | -2.832 | 0.004752 | 0.014367  | -3.039 | Tryptase gamma                                       | Q9NRR2  | 25823  | TPSG1    |
| OCAD1                     | -0.257 | 10.728  | -2.823 | 0.004885 | 0.014735  | -3.064 | OCIA domain-containing protein 1                     | Q9NX40  | 54940  | OCIAD1   |
| SMAC                      | -0.214 | 11.859  | -2.822 | 0.004914 | 0.014744  | -3.069 | Diablo homolog, mitochondrial                        | Q9NR28  | 56616  | DIABLO   |
| EMR2                      | 0.417  | 9.371   | 2.821  | 0.004919 | 0.014744  | -3.070 | Adhesion G protein-coupled receptor E2               | Q9UHX3  | 30817  | ADGRE2   |
| CD70                      | -0.514 | 9.156   | -2.821 | 0.004922 | 0.014744  | -3.070 | CD70 antigen                                         | P32970  | 970    | CD70     |
| NLGNX                     | -0.405 | 10.187  | -2.819 | 0.004951 | 0.014773  | -3.076 | Neuroigin-4, X-linked                                | Q8N0W4  | 57502  | NLGN4X   |
| TBK1                      | -0.286 | 8.811   | -2.819 | 0.004955 | 0.014773  | -3.076 | Serine/threonine-protein kinase TBK1                 | Q9UHD2  | 29110  | TBK1     |
| GSTA3                     | -0.542 | 8.587   | -2.816 | 0.004998 | 0.014867  | -3.084 | Glutathione S-transferase A3                         | Q16772  | 2940   | GSTA3    |
| Gro-a                     | -0.258 | 10.891  | -2.814 | 0.005027 | 0.01492   | -3.089 | Growth-regulated alpha protein                       | P09341  | 2919   | CXCL1    |
| Topoisomerase I           | -0.405 | 9.967   | -2.813 | 0.005052 | 0.014929  | -3.094 | DNA topoisomerase 1                                  | P11387  | 7150   | TOP1     |
| phosphoglycerate kinase 1 | -0.218 | 12.466  | -2.813 | 0.005053 | 0.014929  | -3.094 | Phosphoglycerate kinase 1                            | P00558  | 5230   | PGK1     |
| DC-SIGN                   | 0.522  | 11.239  | 2.804  | 0.005193 | 0.015306  | -3.118 | CD209 antigen                                        | Q9NNX6  | 30835  | CD209    |
| RSPO4                     | -0.374 | 8.959   | -2.790 | 0.005414 | 0.015923  | -3.156 | R-spondin-4                                          | Q210M5  | 343637 | RSPO4    |
| LRRT3                     | -0.306 | 8.845   | -2.788 | 0.005453 | 0.016002  | -3.162 | Leucine-rich repeat transmembrane neuronal protein 3 | Q86VH5  | 347731 | LRRTM3   |
| CD30                      | -0.241 | 11.119  | -2.784 | 0.005517 | 0.016153  | -3.173 | Tumor necrosis factor receptor superfamily member 8  | P28908  | 943    | TNFRSF8  |

Table S16

| vars                       | logFC  | AveExpr | t      | P.Value  | adj.P.Val | B      | TargetFullName                                           | UniProt       | GeneID    | Symbol   |
|----------------------------|--------|---------|--------|----------|-----------|--------|----------------------------------------------------------|---------------|-----------|----------|
| Livin B                    | -0.303 | 7.536   | -2.778 | 0.005614 | 0.016398  | -3.188 | Baculoviral IAP repeat-containing protein 7 Isoform beta | Q96CA5        | 79444     | BIRC7    |
| MIF                        | -0.383 | 10.378  | -2.775 | 0.005662 | 0.016504  | -3.196 | Macrophage migration inhibitory factor                   | P14174        | 4282      | MIF      |
| PKC-B-II                   | -0.751 | 12.900  | -2.770 | 0.005752 | 0.016726  | -3.210 | Protein kinase C beta type (splice variant beta-II)      | P05771        | 5579      | PRKCB    |
| Sphingosine kinase 1       | -0.665 | 10.121  | -2.766 | 0.00582  | 0.016887  | -3.221 | Sphingosine kinase 1                                     | Q9NYA1        | 8877      | SPHK1    |
| IL-17 RC                   | 0.394  | 11.037  | 2.758  | 0.005971 | 0.017288  | -3.244 | Interleukin-17 receptor C                                | Q8NAC3        | 84818     | IL17RC   |
| ULBP-1                     | -0.474 | 10.101  | -2.754 | 0.006047 | 0.017468  | -3.255 | NKG2D ligand 1                                           | Q9BZM6        | 80329     | ULBP1    |
| Glutamate carboxypeptidase | -0.293 | 11.237  | -2.750 | 0.006115 | 0.017598  | -3.265 | Cytosolic non-specific dipeptidase                       | Q96KP4        | 55748     | CNDP2    |
| Kallistatin                | 0.270  | 15.201  | 2.750  | 0.00612  | 0.017598  | -3.266 | Kallistatin                                              | P29622        | 5267      | SERPINA4 |
| IL-17 RD                   | -0.323 | 9.743   | -2.749 | 0.006133 | 0.017598  | -3.268 | Interleukin-17 receptor D                                | Q8NFM7        | 54756     | IL17RD   |
| Lymphotoxin b R            | -0.302 | 13.130  | -2.745 | 0.00621  | 0.01778   | -3.279 | Tumor necrosis factor receptor superfamily member 3      | P36941        | 4055      | LTBR     |
| HCG                        | -1.272 | 10.870  | -2.737 | 0.00635  | 0.01814   | -3.299 | Human Chorionic Gonadotropin                             | P01215,P01233 | 1081 1082 | CGA CGB  |
| CATF                       | -0.324 | 11.903  | -2.732 | 0.006447 | 0.018379  | -3.312 | Cathepsin F                                              | Q9UBX1        | 8722      | CTSF     |
| IL-10 Ra                   | -0.142 | 11.060  | -2.729 | 0.006509 | 0.018514  | -3.321 | Interleukin-10 receptor subunit alpha                    | Q13651        | 3587      | IL10RA   |
| HMGR                       | -0.388 | 9.315   | -2.727 | 0.006544 | 0.018573  | -3.326 | 3-hydroxy-3-methylglutaryl-coenzyme A reductase          | P04035        | 3156      | HMGCR    |
| vWF                        | 0.848  | 14.199  | 2.721  | 0.006677 | 0.018908  | -3.344 | von Willebrand factor                                    | P04275        | 7450      | VWF      |
| Cytochrome P450 3A4        | -0.264 | 10.156  | -2.712 | 0.006859 | 0.01938   | -3.368 | Cytochrome P450 3A4                                      | P08684        | 1576      | CYP3A4   |
| HDAC8                      | -0.269 | 11.371  | -2.701 | 0.007073 | 0.019942  | -3.395 | Histone deacetylase 8                                    | Q9BY41        | 55869     | HDAC8    |

Table S16

| vars            | logFC  | AveExpr | t      | P.Value  | adj.P.Val | B      | TargetFullName                                              | UniProt | GeneID | Symbol   |
|-----------------|--------|---------|--------|----------|-----------|--------|-------------------------------------------------------------|---------|--------|----------|
| BLC             | 0.664  | 11.428  | 2.700  | 0.007106 | 0.019957  | -3.399 | C-X-C motif chemokine 13                                    | O43927  | 10563  | CXCL13   |
| Persephin       | -0.311 | 8.625   | -2.700 | 0.007109 | 0.019957  | -3.400 | Persephin                                                   | O60542  | 5623   | PSPN     |
| PH              | -0.472 | 11.513  | -2.698 | 0.007141 | 0.020005  | -3.404 | Pancreatic hormone                                          | P01298  | 5539   | PPY      |
| PSME3           | -0.368 | 9.293   | -2.695 | 0.007202 | 0.020132  | -3.411 | Proteasome activator complex subunit 3                      | P61289  | 10197  | PSME3    |
| GM-CSF          | -0.652 | 8.586   | -2.684 | 0.007435 | 0.020739  | -3.440 | Granulocyte-macrophage colony-stimulating factor            | P04141  | 1437   | CSF2     |
| Neurotrophin-5  | -0.373 | 8.395   | -2.669 | 0.007781 | 0.021656  | -3.480 | Neurotrophin-4                                              | P34130  | 4909   | NTF4     |
| TGF-b2          | -0.463 | 9.040   | -2.667 | 0.007835 | 0.02176   | -3.486 | Transforming growth factor beta-2                           | P61812  | 7042   | TGFB2    |
| SLAF7           | 0.765  | 15.378  | 2.660  | 0.007993 | 0.02215   | -3.504 | SLAM family member 7                                        | Q9NQ25  | 57823  | SLAMF7   |
| IL-22           | -0.392 | 8.113   | -2.659 | 0.008015 | 0.022164  | -3.506 | Interleukin-22                                              | Q9GZX6  | 50616  | IL22     |
| RS3A            | -0.555 | 9.866   | -2.655 | 0.008099 | 0.022351  | -3.516 | 40S ribosomal protein S3a                                   | P61247  | 6189   | RPS3A    |
| Mcl-1           | -0.579 | 10.195  | -2.646 | 0.008337 | 0.022959  | -3.542 | Induced myeloid leukemia cell differentiation protein Mcl-1 | Q07820  | 4170   | MCL1     |
| FGF-16          | -0.562 | 10.528  | -2.640 | 0.008474 | 0.023285  | -3.556 | Fibroblast growth factor 16                                 | O43320  | 8823   | FGF16    |
| NACA            | -0.766 | 12.761  | -2.637 | 0.008549 | 0.023443  | -3.564 | Nascent polypeptide-associated complex subunit alpha        | Q13765  | 4666   | NACA     |
| BMP-14          | -0.711 | 12.129  | -2.635 | 0.008594 | 0.023515  | -3.568 | Growth/differentiation factor 5                             | P43026  | 8200   | GDF5     |
| ERAB            | -0.388 | 10.002  | -2.630 | 0.008726 | 0.023827  | -3.582 | 3-hydroxyacyl-CoA dehydrogenase type-2                      | Q99714  | 3028   | HSD17B10 |
| ZNRF3           | -0.507 | 9.771   | -2.627 | 0.008801 | 0.023981  | -3.590 | E3 ubiquitin-protein ligase ZNRF3                           | Q9ULT6  | 84133  | ZNRF3    |
| Peroxiredoxin-1 | -0.560 | 10.738  | -2.621 | 0.00896  | 0.024363  | -3.606 | Peroxiredoxin-1                                             | Q06830  | 5052   | PRDX1    |

Table S16

| vars             | logFC  | AveExpr | t      | P.Value  | adj.P.Val | B      | TargetFullName                                        | UniProt          | GeneID    | Symbol       |
|------------------|--------|---------|--------|----------|-----------|--------|-------------------------------------------------------|------------------|-----------|--------------|
| GNS              | -0.403 | 12.122  | -2.619 | 0.009    | 0.02442   | -3.609 | N-acetylglucosamine-6-sulfatase                       | P15586           | 2799      | GNS          |
| TWEAK            | -0.351 | 11.109  | -2.617 | 0.009062 | 0.024538  | -3.616 | Tumor necrosis factor ligand superfamily member 12    | O43508           | 8742      | TNFSF12      |
| Notch-3          | 0.342  | 9.191   | 2.615  | 0.009104 | 0.02459   | -3.620 | Neurogenic locus notch homolog protein 3              | Q9UM47           | 4854      | NOTCH3       |
| IDE              | -0.479 | 11.498  | -2.615 | 0.009122 | 0.02459   | -3.621 | Insulin-degrading enzyme                              | P14735           | 3416      | IDE          |
| FCN1             | -0.402 | 9.605   | -2.614 | 0.009138 | 0.02459   | -3.623 | Ficolin-1                                             | O00602           | 2219      | FCN1         |
| HSP 60           | -0.257 | 10.436  | -2.610 | 0.009235 | 0.024789  | -3.632 | 60 kDa heat shock protein, mitochondrial              | P10809           | 3329      | HSPD1        |
| SSRP1            | -0.381 | 9.693   | -2.610 | 0.00925  | 0.024789  | -3.634 | FACT complex subunit SSRP1                            | Q08945           | 6749      | SSRP1        |
| a2-Macroglobulin | 0.563  | 15.404  | 2.590  | 0.009791 | 0.026184  | -3.684 | Alpha-2-macroglobulin                                 | P01023           | 2         | A2M          |
| CSH              | -0.327 | 13.399  | -2.587 | 0.009872 | 0.026345  | -3.691 | Chorionic somatomammotropin hormone                   | PODML2<br>PODML3 | 1442 1443 | CSH1<br>CSH2 |
| Thrombin         | 0.470  | 15.840  | 2.578  | 0.010133 | 0.026986  | -3.715 | Thrombin                                              | P00734           | 2147      | F2           |
| PACAP-38         | -0.355 | 8.781   | -2.567 | 0.010473 | 0.027835  | -3.744 | Pituitary adenylate cyclase-activating polypeptide 38 | P18509           | 116       | ADCYAP1      |
| IL-6             | -0.386 | 9.351   | -2.559 | 0.010698 | 0.028375  | -3.763 | Interleukin-6                                         | P05231           | 3569      | IL6          |
| IL-20 Ra         | -0.363 | 9.139   | -2.556 | 0.010787 | 0.028541  | -3.770 | Interleukin-20 receptor subunit alpha                 | Q9UHF4           | 53832     | IL20RA       |
| CTLA-4           | -0.637 | 7.232   | -2.556 | 0.010805 | 0.028541  | -3.771 | Cytotoxic T-lymphocyte protein 4                      | P16410           | 1493      | CTLA4        |
| sFRP-3           | 0.294  | 11.687  | 2.549  | 0.011014 | 0.029034  | -3.788 | Secreted frizzled-related protein 3                   | Q92765           | 2487      | FRZB         |

Table S16

| vars                      | logFC  | AveExpr | t      | P.Value  | adj.P.Val | B      | TargetFullName                                                   | UniProt | GeneID | Symbol   |
|---------------------------|--------|---------|--------|----------|-----------|--------|------------------------------------------------------------------|---------|--------|----------|
| RSPO2                     | -0.300 | 9.241   | -2.545 | 0.011131 | 0.029283  | -3.798 | R-spondin-2                                                      | Q6UXX9  | 340419 | RSPO2    |
| MP2K4                     | 0.538  | 15.497  | 2.540  | 0.011306 | 0.029683  | -3.811 | Dual specificity mitogen-activated protein kinase kinase 4       | P45985  | 6416   | MAP2K4   |
| Galectin-3                | 0.295  | 14.246  | 2.538  | 0.01135  | 0.029739  | -3.815 | Galectin-3                                                       | P17931  | 3958   | LGALS3   |
| PTH                       | 0.719  | 11.525  | 2.536  | 0.011421 | 0.029866  | -3.820 | Parathyroid hormone                                              | P01270  | 5741   | PTH      |
| Angiostatin               | 0.315  | 14.220  | 2.532  | 0.011543 | 0.030123  | -3.830 | Angiostatin                                                      | P00747  | 5340   | PLG      |
| calgranulin B             | 0.670  | 11.118  | 2.523  | 0.011845 | 0.030849  | -3.852 | Protein S100-A9                                                  | P06702  | 6280   | S100A9   |
| Flt3 ligand               | -0.380 | 10.150  | -2.521 | 0.011925 | 0.030995  | -3.858 | Fms-related tyrosine kinase 3 ligand                             | P49771  | 2323   | FLT3LG   |
| ADAMTS-4                  | -0.351 | 8.072   | -2.517 | 0.012058 | 0.031278  | -3.868 | A disintegrin and metalloproteinase with thrombospondin motifs 4 | O75173  | 9507   | ADAMTS4  |
| Elafin                    | 0.582  | 13.502  | 2.513  | 0.01221  | 0.031574  | -3.879 | Elafin                                                           | P19957  | 5266   | PI3      |
| PLK-1                     | -0.310 | 8.773   | -2.511 | 0.012247 | 0.031574  | -3.882 | Serine/threonine-protein kinase PLK1                             | P53350  | 5347   | PLK1     |
| Lectin, mannose-binding 2 | -0.462 | 16.394  | -2.511 | 0.012251 | 0.031574  | -3.882 | Vesicular integral-membrane protein VIP36                        | Q12907  | 10960  | LMAN2    |
| Testican-2                | 0.283  | 9.913   | 2.511  | 0.012269 | 0.031574  | -3.883 | Testican-2                                                       | Q92563  | 9806   | SPOCK2   |
| MMP-3                     | 0.494  | 10.365  | 2.487  | 0.013106 | 0.033659  | -3.941 | Stromelysin-1                                                    | P08254  | 4314   | MMP3     |
| Glypican 3                | -0.400 | 10.104  | -2.484 | 0.013241 | 0.033939  | -3.950 | Glypican-3                                                       | P51654  | 2719   | GPC3     |
| Marapsin                  | -0.241 | 14.617  | -2.474 | 0.013588 | 0.03476   | -3.973 | Serine protease 27                                               | Q9BQR3  | 83886  | PRSS27   |
| prostatic binding protein | -0.703 | 11.005  | -2.464 | 0.013964 | 0.035649  | -3.997 | Phosphatidylethanolamine-binding protein 1                       | P30086  | 5037   | PEBP1    |
| NRX1B                     | -0.414 | 10.138  | -2.464 | 0.01399  | 0.035649  | -3.999 | Neurexin-1-beta                                                  | P58400  | 9378   | NRXN1    |
| CK-MM                     | 0.420  | 10.375  | 2.455  | 0.014317 | 0.03641   | -4.019 | Creatine kinase M-type                                           | P06732  | 1158   | CKM      |
| Mammaglobin 2             | -0.185 | 15.035  | -2.450 | 0.014527 | 0.036872  | -4.032 | Mammaglobin-B                                                    | O75556  | 4246   | SCGB2A1  |
| MAPK2                     | -0.356 | 11.230  | -2.435 | 0.015146 | 0.038369  | -4.068 | MAP kinase-activated protein kinase 2                            | P49137  | 9261   | MAPKAPK2 |



Table S16

| vars         | logFC  | AveExpr | t      | P.Value  | adj.P.Val | B      | TargetFullName                            | UniProt                    | GeneID    | Symbol                     |
|--------------|--------|---------|--------|----------|-----------|--------|-------------------------------------------|----------------------------|-----------|----------------------------|
| Soggy-1      | -0.262 | 14.942  | -2.433 | 0.015237 | 0.038523  | -4.074 | Dickkopf-like protein 1                   | Q9UK85                     | 27120     | DKKL1                      |
| PTHrP        | -0.315 | 9.974   | -2.430 | 0.015333 | 0.038689  | -4.079 | Parathyroid hormone-related protein       | P12272                     | 5744      | PTHLH                      |
| GCKR         | -0.334 | 10.204  | -2.424 | 0.015601 | 0.03929   | -4.094 | Glucokinase regulatory protein            | Q14397                     | 2646      | GCKR                       |
| MCP-4        | -0.445 | 9.912   | -2.417 | 0.01591  | 0.039992  | -4.111 | C-C motif chemokine 13                    | Q99616                     | 6357      | CCL13                      |
| RGMA         | 0.334  | 14.041  | 2.410  | 0.016188 | 0.04061   | -4.127 | Repulsive guidance molecule A             | Q96B86                     | 56963     | RGMA                       |
| PBEF         | -0.587 | 10.591  | -2.408 | 0.016291 | 0.040789  | -4.132 | Nicotinamide phosphoribosyltransferase    | P43490                     | 10135     | NAMPT                      |
| EphA5        | -0.366 | 10.626  | -2.403 | 0.016506 | 0.041249  | -4.144 | Ephrin type-A receptor 5                  | P54756                     | 2044      | EPHA5                      |
| BMPER        | -0.395 | 9.992   | -2.402 | 0.016554 | 0.04129   | -4.146 | BMP-binding endothelial regulator protein | Q8N8U9                     | 168667    | BMPER                      |
| ARSB         | -0.316 | 11.255  | -2.393 | 0.016977 | 0.042263  | -4.168 | Arylsulfatase B                           | P15848                     | 411       | ARSB                       |
| AMPK a1b1g1  | -0.338 | 9.558   | -2.389 | 0.017141 | 0.042541  | -4.177 | AMP Kinase (alpha1beta1gamma1)            | Q13131<br>Q9Y478<br>P54619 | 5562 5564 | PRKAA1<br>PRKAB1<br>PRKAG1 |
| IFN-lambda 2 | -0.261 | 8.607   | -2.389 | 0.017154 | 0.042541  | -4.177 | Interferon lambda-2                       | Q8IZJ0                     | 282616    | IFNL2                      |
| IL-17F       | -0.475 | 9.691   | -2.385 | 0.01734  | 0.042921  | -4.187 | Interleukin-17F                           | Q96PD4                     | 112744    | IL17F                      |
| CAD15        | -0.440 | 13.128  | -2.384 | 0.017404 | 0.042995  | -4.190 | Cadherin-15                               | P55291                     | 1013      | CDH15                      |
| LPPL         | -0.315 | 10.567  | -2.382 | 0.017498 | 0.043146  | -4.194 | Galectin-10                               | Q05315                     | 1178      | CLC                        |
| AGR2         | -0.230 | 11.155  | -2.371 | 0.018017 | 0.044342  | -4.220 | Anterior gradient protein 2 homolog       | O95994                     | 10551     | AGR2                       |
| ROBO3        | -0.336 | 9.482   | -2.367 | 0.018206 | 0.044721  | -4.229 | Roundabout homolog 3                      | Q96MS0                     | 64221     | ROBO3                      |
| Artemin      | -0.359 | 9.795   | -2.362 | 0.018431 | 0.045188  | -4.240 | Artemin                                   | Q5T4W7                     | 9048      | ARTN                       |
| MBL          | 0.785  | 13.837  | 2.359  | 0.018606 | 0.045449  | -4.248 | Mannose-binding protein C                 | P11226                     | 4153      | MBL2                       |

Table S16

| <b>vars</b>    | <b>logFC</b> | <b>AveExpr</b> | <b>t</b> | <b>P.Value</b> | <b>adj.P.Val</b> | <b>B</b> | <b>TargetFullName</b>               | <b>UniProt</b> | <b>GeneID</b> | <b>Symbol</b> |
|----------------|--------------|----------------|----------|----------------|------------------|----------|-------------------------------------|----------------|---------------|---------------|
| Nogo Receptor  | 0.341        | 10.770         | 2.359    | 0.018607       | 0.045449         | -4.248   | Reticulon-4 receptor                | Q9BZR6         | 65078         | RTN4R         |
| DRAK2          | -0.268       | 13.109         | -2.342   | 0.019439       | 0.047392         | -4.286   | Serine/threonine-protein kinase 17B | O94768         | 9262          | STK17B        |
| FGF-6          | -0.383       | 8.936          | -2.338   | 0.01969        | 0.047913         | -4.297   | Fibroblast growth factor 6          | P10767         | 2251          | FGF6          |
| IL-1F8         | -0.328       | 9.889          | -2.336   | 0.019782       | 0.048047         | -4.301   | Interleukin-36 beta                 | Q9NZH7         | 27177         | IL36B         |
| gp130, soluble | 0.278        | 12.912         | 2.327    | 0.020229       | 0.049042         | -4.321   | Interleukin-6 receptor subunit beta | P40189         | 3572          | IL6ST         |
